# Supplementary material for: Does Dark-Spot Syndrome Experimentally Transmit among Caribbean Corals?
Source: PLoS One. 2016 Jan 20;11(1):e0147493. doi: 10.1371/journal.pone.0147493 (PMC4720368; doi:10.1371/journal.pone.0147493)
Supplement: S3 Table — Nucleotide sequences for all operational taxonomic units (OTUs) identified on Siderastrea siderea corals tested in waterborne transmission experiments of dark-spot syndrome. (XLSX) [file pone.0147493.s008.xlsx]

## Sheet: Sheet1
S3 Table. Nucleotide sequences for OTUs. Nucleotide sequences for all operational taxonomic units (OTUs) identified on Siderastrea siderea corals tested in waterborne transmission experiments of dark-spot syndrome.
>OTU_1
AGTGAACGCTGGCGGTAGGCCTAACACATGCAAGTCGAACGGCAGCACAGTAAGAGCTTGCTCTTATGGGTGGCGAGTGG
CGGACGGGTGAGGAATACATCGGAATCTACTCTGTCGTGGgggATAACGTAGGGAAACTTACGCTAATACCGCATACGAC
CTACGGGTGAAAGCAGGGGATCTTCGGACCTTGCGCGATTGAATGAGCCGATGTCGGATTAGCTAGTTGGCGGGGTAAAG
GCCCACCAAGGCGACGATCCGTAGCTGGTCTGAGAGGATGATCAGCCACACTGGAACTGAGACACGGTCCAGACTCCTAC
GGGAGGCAGCAGTGGGGAATATTGGACAATGGGCGCAAGCCTGATCCAGCCATACCGCGTGGGTGAAGAAGGCCTTCGGG
TTGTAAAGCCCTTTTGTTGGGAAAGAAATCCAGCCGGCTAATACCTGGTTGGGATGACGGTACCCAAAGAATAAGCACCG
GCTAACTTCGTGCCAGCCGCCGCCGTAACAC
>OTU_2
GATGAACGCTAGCGGCAGGCTTAACACATGCAAGTCGAGGGGTAACAGCAGagagCTTGCTTTCTGGCTGACGACCGGCG
AACGGGTGCGTAACGCGTATGCAACCTACCTCTTACTGGgggATAGCCCGGAGAAATTCGGATTAAGACCCCATAGTATT
TCAATTTCGCATGATTTTGAAATTAAAGGTTACGGTAAGAGATGGGCATGCGTCCCATTAGCTAGATGGTAAGGTAACGG
CTTACCATGGCAACGATGGGTAGGgggCCTGAGAGGGTGATCCcccACACTGGTACTGAGACACGGACCAGACTCCTACG
GGAGGCAGCAGTGAGGAATATTGGACAATGGACGCAAGTCTGATCCAGCCATGCCGCGTGCAGGAAGAATGCCCTATGGG
TTGTAAACTGCTTTTATTTGGGAATAAACCCCTTCTCGTGAGGAGGGCTGAAGGTACCAAACGAATAAGCACCGGCTAAC
TCCGTGCCAGCCGCCGCCGTAACAC
>OTU_3
AACGAACGCTGGCGGCAGGCCTAACACATGCAAGTCGAGCgcgcCTTTCGGGGTGAGCGGCGGACGGGTTAGTAACGCGT
GGGAATATGCCCTTTGGTACGGAATAGCCTCTGGAAACGGAGAGTAATACCGTATGAGCCCTTCGGgggAAAGATTTATC
GCCAAAGGATTAGCCCGCGTTAGATTAGGTAGTTGGTGGGGTAATGGCCTACCAAGCCTACGATCTATAGCTGGTTTTAG
AGGATGATCAGCAACACTGGGACTGAGACACGGCCCAGACTCCTACGGGAGGCAGCAGTGGGGAATCTTGGACAATGGgg
gCAACCCTGATCCAGCCATGCCGCGTGAGTGATGAAGGCCTTAGGGTCGTAAAGCTCTTTCGCCTGTGAAGATAATGACG
GTAGCAGGTAAAGAAACCCCGGCTAACTCCGTGCCAGCCGCCGCCGTAACAC
>OTU_4
AACGAACGCTGGCGGCAGGCTTAACACATGCAAGTCGAACGATCTCTTCGGAGATAGTGGCAGACGGGTGAGTAACGCGT
GGGAACCTACCTTATTCTACGGAATAACACAGAGAAATTTGTGCTAATACCGTATACGCCCTTTGGgggAAAGATTTATC
GGAGTAAGATGGGCCCGCGTTGGATTAGCTAGTTGGTGGGGTAATGGCCTACCAAGGCGACGATCTATAGCTGGTCTGAG
AGGATGATCAGCCACACTGGGACTGAGACACGGCCCAGACTCCTACGGGAGGCAGCAGTGGGGAATATTGGACAATGGGC
GCAAGCCTGATCCAGCCATGCCGCGTGAGTGATGAAGGCCTTAGGGTTGTAAAGCTCTTTCAACGGTGAAGATAATGACG
GTAACCGTAGAAGAAGCCCCGGCTAACTTCGTGCCAGCCGCCGCCGTAACAC
>OTU_5
AACGAACGCTGGCGGCAGGCCTAACACATGCAAGTCGAGCgcgcCCTTCGGGGTGAGCGGCGGACGGGTTAGTAACGCGT
GGGAACGTGCCCTTCTCTAAGGAATAGCCACTGGAAACGGTGAGTAATACCTTATACGCCCTTCGGgggAAAGATTTATC
GGAGAAGGATCGGCCCGCGTTAGATTAGATAGTTGGTGGGGTAACGGCCTACCAAGTCTACGATCTATAGCTGGTTTTAG
AGGATGATCAGCAACACTGGGACTGAGACACGGCCCAGACTCCTACGGGAGGCAGCAGTGGGGAATCTTGGACAATGGgg
gCAACCCTGATCCAGCCATGCCGCGTGAGTGATGAAGGCCTTAGGGTCGTAAAGCTCTTTCGCCTGTGATGATAATGACA
GTAGCAGGTAAAGAAACCCCGGCTAACTCCGTGCCAGCCGCCGCCGTAACAC
>OTU_6
AACGAACGCTGGCGGCAGGCCTAACACATGCAAGTCGAGCGCCCTCTTCGGAGGGAGCGGCGGACGGGTTAGTAACGCGT
GGGAACGTGCCCAGATCTAAGGAATAGCCACTGGAAACGGTGAGTAATACCTTATACGCCCTTCGGgggAAAGATTTATC
GGATTTGGATCGGCCCGCGTTAGATTAGGTAGTTGGTGGGGTAATGGCCTACCAAGCCTACGATCTATAGCTGGTTTTAG
AGGATGATCAGCAACACTGGGACTGAGACACGGCCCAGACTCCTACGGGAGGCAGCAGTGGGGAATCTTGGACAATGGGC
GCAAGCCTGATCCAGCCATGCCGCGTGAGTGATGAAGGCCCTAGGGTCGTAAAGCTCTTTCGCCTGTGAAGATAATGACG
GTAGCAGGTAAAGAAACCCCGGCTAACTCCGTGCCAGCCGCCGCCGTAACAC
>OTU_7
AATGAACGTTGGCGGCATGGATTAGGCATGCAAGTCGAGCGAGAAGTCTTAGTTTGACGCTTCGGTTGATTTCTAAGATG
GACAGCGGCGAAAGGGTGAGTAACGCGTAGTTACCTGCCTCAGGGTCTGGAATAGCCTCGGGAAACTGAGGGTAATGCCA
GATAATATCTCCGGATCAAAGGTGAGATTCCGCCCTGAGAGGGGACTGCGTCCTACTAGCTTGTTGGTGGGGTAAAGGCC
TACCAAGGCTCAGATGGGTAGCGGGCGTGAGAGCGTGGCCCGTCACACTGGGACTGAGACACTGCCCAGACACCTACGGG
TGGCTGCAGTCGAGAATCTTCGGCAATGCGCGAAAGCGTGACCGAGCAATGCCGCGTGCGGGATGAAGGCCCTCGGGTTG
TAAACCGCGAAAGTTGGGAGGAAGGACTTGTGAAGAGCAAGTTTTGACCGATCTTCAGTAAGGACGGGCTAAGTTCGTGC
CAGCCGCCGCCGTAACAC
>OTU_8
GACGAACGCTGGCGGTGTGCTTAATACATGCAAGTTGAACGATAAGGCCCTTTCGGgggTACATAAGTAGCGGACGGGTG
AGTAATGCATAGGTAATCTGCCTTAAGGCGGgggATAACATTGAGAAATTAGTGCTAATACCCCATATGTCATAAGTTGA
AATATTTATGATAAAAGTTCAGGCACCTTAAGATGAGCCTATGTCTGATTAGCTAGTTGGTGAGGTAAAGGCTTACCAAG
GCAACGATCAGTAGCTGGTCTGAGAGGATGATCAGCCACAATGGGACTGAGACACGGCCCATACTCCTACGGGAGGCAGC
AGTAGGGAATTTTGCGCAATGGGCGAAAGCCTGACGCAGCAACACCGCGTGAACGATGAAGCTTtttGGAGTGTAAAGTT
CTGTCAGTAGGGACGAAACGATGACGGTACCTACAGAGGAAGCATCGGCTAACTACGTGCCAGCCGCCGCCGTAACAC
>OTU_9
GATGAACGCTAGCGGCAGGCCTAACACATGCAAGTCGAACGGTAACAGCAGAGCTTGCTCTGGCTGACGAGTGGCGCACG
GGTGCGTAACGCGTATACAATCTACCTATTACAGGGGTATAGCCTTTAGAAATGAAGAATAATCCcccATAGTATTtttA
TTTGGCATCAGATAGAGATTAAAGATTTATCGGTAATAGATGAGTATGCGTTCTATTAGCTAGTAGGTGAGGTAACGGCT
CACCTAGGCGACGATAGATAGGGGCCCTGAGAGGgggATCCcccACACTGGTACTGAGACACGGACCAGACTCCTACGGG
AGGCAGCAGTGAGGAATATTGGACAATGGGCGAGAGCCTGATCCAGCCATGCCGCGTGCAGGAAGACTGCCCTATGGGTT
GTAAACTGCTTTTAtataGGAAGAAACCATTCTACGTGTAGAGTGCTGACGGTACTATAAGAATAAGCATCGGCTAACTC
CGTGCCAGCCGCCGCCGTAACAC
>OTU_10
GATGAACGCTGGCGAGATGCTTTACACATGCAAGTCATACGAGAGTTtttAACTCAAGTGGCGGACGGGTGAGTAACACG
TAAGAATTTACCTTTAGGAGGgggATAACAACGAGAAATTGTTGCTAATACCCCATATGCTTTCGAGTGAAATGGATTtt
tCCGCCTAGagagaAGCTTGCGCCTGATTAGCTTGTTGGTAAGGTAATGGCTTACCAAGGCGACGATCAGTATCTGGTTT
GAGAGGATGATCAGACacacTGGAACTGAGACACGGTCCAGACTCCTACGGGAGGCAGCAGTGGGGAATTTTCCGCAATG
GGCGAAAGCCTGACGGAGCAATCTCGCGTGAGGGATGACGGCCTATGGGTTGTAAACCTCTTttttCAGGGAGGAATAAA
ATGACGTGTACCTGAAGAATAAGCATCGGCTAACTCCGTGCCAGCCGCCGCCGTAACAC
>OTU_11
AGTTAACGCTAGTGGCgcgcATCAATACATGCAAGTTtttGTTGATTttttCTAATTTATTAGGAAAAGGAAATTAAGCG
AACGGGTGAGGATAAAACGAGTATTTGCCTTTAGGTCTGGGATAAGAGTCTAAGTTTTCATCAAATTtttGAAGTTAATA
TGACTTAATACCGGATATTGAAAATTACGATGCCTAAAGATAAGCTGGTTGAAGATTAGGTAGTTGGTAAGGTAACAGCT
TACCAAGCCAATGATCTTTAGTGGTACTGAGAGGTAGAACCACCACACGGGAACTGAGACAAGGTCCCGACTCATTTAGA
GGCAGCAGTAGGGAATTTTGGACAATGAAGGAAACTTTGATCCAGCGACGCCACATGGAGGAAAACCTAAACGAAGGCAA
AAGTGTTGTAAACTCCATATCTTTGGGAAGAAAATGACATTACCAAAAGACAAGTCCTGGCTAATCTTGTGCCAGCCGCC
GCCGTAACAC
>OTU_12
AACGAACGCTGGCGGCAGGCCTAACACATGCAAGTCGAGCGCCCTCTTCGGAGGGAGCGGCGGACGGGTTAGTAACGCGT
GGGAACGTGCCTctctctTGGGAATAGCCATTGGAAACGATGATTAATGCCCGATACGCCCTTTGGgggAAAGATTTATC
GGAgagagaTCGGCCCGCGTTAGATTAGTTAGTTGGTGGGGTAACGGCTTACCAAGACGACGATCTATAGCTGGTTTGAG
AGGATGATCAGCAACACTGGGACTGAGACACGGCCCAGACTCCTACGGGAGGCAGCAGTGGGGAATCTTAGACAATGGGC
GCAAGCCTGATCTAGCCATGCCGCGTGAGTGAAGAAGGCCTTAGGGTCGTAAAGCTCTTTCGCCTGTGAAGATAATGACG
GTAGCAGGTAAAGAAACCCCGGCTAACTCCGTGCCAGCCGCCGCCGTAACAC
>OTU_13
ATTGAACGCTGGCGGTATGCTTAACACATGCAAGTCGAACGGTAACAGGTCTAGCTTGCTAGACGCTGACGAGTGGCGGA
CGGGTGAGTAACGCGTAGGGATCTGTCTAGAAGTTTGGGACAACACGGGGAAACTCGTGCTAATACCGGATACGCTCTAC
GGAGGAAAGACTGGATTTATTCAGTTGCTTTTGGGTGAACCTGCGTTGGATTAGCTTGTTGGTGGGGTAAAGGCCTACCA
AGGCGACGATCCATAGCTGTTCTGAGAGGAAGATCAGCCACACTGGGACTGAGACACGGCCCAGACTCCTACGGGAGGCA
GCAGTGGGGAATATTGGACAATGGGCGCAAGCCTGATCCAGCAATACCGCGTgtgtgAAGAAGGCCTGAGGGTTGTAAAG
CACTTTCAGCGAGGAGGAAGGTGATGATGTTAATAGCATTGTTATTTGACGTTACTCGCAGAAGAAGCACCGGCTAACTC
TGTGCCAGCCGCCGCCGTAACAC
>OTU_14
AACGAACGCTGGCGGCAGGCCTAACACATGCAAGTCGAGCGCTCACTTCGGTGGGAGCGGCGGACGGGTTAGTAACGCGT
GGGAACGTGCCCTTCTCTACGGAATAGCCATTGGAAACGATGAGTAATACCGTATACGCCCTTCGGgggAAAGATTTATC
GGAGAAGGATCGGCCCGCGTTAGATTAGATAGTTGGTGGGGTAACGGCCTACCAAGTCTACGATCTATAGCTGGTTTTAG
AGGATGATCAGCAACACTGGGACTGAGACACGGCCCAGACTCCTACGGGAGGCAGCAGTGGGGAATCTTAGACAATGGGC
GCAAGCCTGATCTAGCCATGCCGCGTGAGTGATGAAGGCCCTAGGGTCGTAAAGCTCTTTCGCCAGGGATGATAATGACA
GTACCTGGTAAAGAAACCCCGGCTAACTCCGTGCCAGCCGCCGCCGTAACAC
>OTU_15
ATTGAACGCTGGCGGCAGGCCTAACACATGCAAGTCGAGCGGATGAAGGGAGCTTGCTCCTGGATTCAGCGGCGGACGGG
TGAGTAATGCCTAGGAATCTGCCTGGTAGTGGgggATAACGTCCGGAAACGGGCGCTAATACCGCATACGTCCTGAGGGA
GAAAGTGGgggATCTTCGGACCTCACGCTATCAGATGAGCCTAGGTCGGATTAGCTAGTTGGTGGGGTAAAGGCCTACCA
AGGCGACGATCCGTAACTGGTCTGAGAGGATGATCAGTCACACTGGAACTGAGACACGGTCCAGACTCCTACGGGAGGCA
GCAGTGGGGAATATTGGACAATGGGCGAAAGCCTGATCCAGCCATGCCGCGTgtgtgAAGAAGGTCTTCGGATTGTAAAG
CACTTTAAGTTGGGAGGAAGGGCAGTAAGTTAATACCTTGCTGTTTTGACGTTACCAACAGAATAAGCACCGGCTAACTT
CGTGCCAGCCGCCGCCGTAACAC
>OTU_16
GATGAACGCTGGCGGCGTGCCTAACACATGCAAGTCGAGCGAGAAGGTTATGACTGATTCTTCGGATGAAGGATTAACTG
GAAAGCGGCGGACGGGTGAGTAACGCGTGGGTAACCTGCCCCATACACAGGGATAGCCATTGGAAACGATGATTAATACC
TGATAACACTATAGTATCGCATGATACATTAGTCAAAGATTTATCGGTATGGGATGGACCCGCGTCTGATTAGCTAGTTG
GTAAGGTAATGGCTTACCAAGGCGACGATCAGTAGCCGACCTGAGAGGGTGATCGGCCACACTGGAACTGAGACACGGTC
CAGACTCCTACGGGAGGCAGCAGTGGGGAATATTGCACAATGGGCGCAAGCCTGATGCAGCAACGCCGCGTGAACGACGA
AGGCCTTCGGGTCGTAAAGTTCTTTTCTTAGGGAAGAAaaaTGACGGTACCTAAGGAATAAGCACCGGCTAAATACGTGC
CAGCCGCCGCCGTAACAC
>OTU_17
ATTGAACGCTGGCGGCAGGCCTAACACATGCAAGTCGAGCGGAAACGAAGAGTAGCTTGCTACTCTGGCGTCGAGCGGCG
GACGGGTGAGTAATGCTTGGGAACATGCCTTGAGGTGGgggACAACAGTTGGAAACGACTGCTAATACCGCATAATGTCT
ACGGACCAAAGGgggCTTCGGCTCTCGCCTTTAGATTGGCCCAAGTGGGATTAGCTAGTTGGTGAGGTAATGGCTCACCA
AGGCGACGATCCCTAGCTGGTTTGAGAGGATGATCAGCCACACTGGGACTGAGACACGGCCCAGACTCCTACGGGAGGCA
GCAGTGGGGAATATTGCACAATGGGCGCAAGCCTGATGCAGCCATGCCGCGTgtgtgAAGAAGGCCTTCGGGTTGTAAAG
CACTTTCAGTCAGGAGGAAAGGTTAGTAGTTAATACCTGCTAGCTGTGACGTTACTGACAGAAGAAGCACCGGCTAACTC
CGTGCCAGCCGCCGCCGTAACAC
>OTU_18
ATTGAACGCTGGCGGCAGGCCTAACACATGCAAGTCGAACGGTAACATTTCTAGCTTGCTAGAAGATGACGAGTGGCGGA
CGGGTGAGTAATGCTTGGGAACTTGCCTTTGCGAGGgggATAACAGTTGGAAACGACTGCTAATACCGCATAATGTCTTC
GGACCAAACGGGGCTTTTAGCTCCGGCGCAAAGagagGCCCAAGTGAGATTAGCTAGTTGGTAAGGTAACGGCTTACCAA
GGCGACGATCTCTAGCTGTTCTGAGAGGAAGATCAGCCACACTGGGACTGAGACACGGCCCAGACTCCTACGGGAGGCAG
CAGTGGGGAATATTGCACAATGGgggAAACCCTGATGCAGCCATGCCGCGTgtgtgAAGAAGGCCTTCGGGTTGTAAAGC
ACTTTCAGTTGTGAGGAAAAGTTAGTAGTTAATACCTGCTAGCCGTGACGTTAACAACAGAAGAAGCACCGGCTAACTCC
GTGCCAGCCGCCGCCGTAACAC
>OTU_19
AATGAACGTTGGCGGCGTGGATTAGGCATGCAAGTCGTGCGAGAAGCTTCCTTCGGGAAGTGGACAGCGGCGAAAGGGAG
AGTAATACGTAGAAATCTGCCCCTGAGTCCGGGATAGCGTTGGGAAACTGGCGGTAATACCGGATAACGTCTTCGGACCA
AAGGTGTGATTCCGCTTGGGGATGAGTCTACGTCCTATTAGCTAGTTGGTGGGGTAATGGCCTACCAAGGCAACGATGGG
TAGCGGGTGTGAGAGCATGATCCGCCTCACTGGGACTGAGACACTGCCCAGACACCTACGGGTGGCTGCAGTCGAGAATC
TTTGTCAATGGACGAAAGTCTGAACAAGCGACGCCGCGTGCGGGATGAAGGCCTTCGGGTTGTAAACCGCTGTCAGTTGG
GAGGAAAGATCTGTGAAGAGCAGATCCTGACCGATCTTCAGAGGAAGGACGGGCTAAGTTCGTGCCAGCCGCCGCCGTAA
CAC
>OTU_20
GATGAACGCTAGCGGCAGGCCTAACACATGCAAGTCGAGGGGTAACAGGGAAAAGCTTGCTTTTCTGCTGACGACCGGCG
CACGGGTGCGGAACGCGTATGGAACCTGCCCCTGTCAGGGGAATAGCCCAGAGAAATTTGGATTAATGCCCCATGGTAAC
ATTATATCGCATGATATTATGTTTAAAGATTTATCGGACAGGGATGGCCATGCGTACCATTAGTCAGATGGTGAGGTAAC
GGCTCACCATAACTACGATGGTTAGGGGCCCTGAGAGGgggATCCcccACACTGGTACTGAGACACGGACCAGACTCCTA
CGGGAGGCAGCAGTGAGGAATATTGGACAATGGTCGGGAGACTGATCCAGCCATGCCGCGTGCAGGATGACTGCCCTATG
GGTTGTAAACTGCTTTTATACGGGAAGAAACCTATCCACGTGTGGATAGCTGACGGTACCGTAAGAATAAGGACCGGCTA
ACTCCGTGCCAGCCGCCGCCGTAACAC
>OTU_21
GACGAACGCTGGCGGCGTGCCTAATACATGCAAGTCGAGCGGACTTTAAAAGCTTGCTTTTAAAGTTAGCGGCGGACGGG
TGAGTAACACGTGGGCAACCTGCCTGTAAGACTGGGATAACTTCGGGAAACCGGAGCTAATACCGGATAATCCTTTTCTA
CTCATGTAGAAAAGCTGAAAGACGGTTTACGCTGTCACTTACAGATGGGCCCGCGGCGCATTAGCTAGTTGGTGAGGTAA
CGGCTCACCAAGGCAACGATGCGTAGCCGACCTGAGAGGGTGATCGGCCACACTGGGACTGAGACACGGCCCAGACTCCT
ACGGGAGGCAGCAGTAGGGAATCTTCCGCAATGGACGAAAGTCTGACGGAGCAACGCCGCGTGAGTGATGAAGGTTTTCG
GATCGTAAAACTCTGTTGTTAGGGAAGAACAAGTACAAGAGTAACTGCTTGTACCTTGACGGTACCTAACCAGAAAGCCA
CGGCTAACTACGTGCCAGCCGCCGCCGTAACAC
>OTU_22
GACGAACGCTGGCGGCGTGCCTAACACATGCAAGTCAAGGAGAACGTTTCCTTCGGGAAATTATTAAACTGGCGCACGGG
TGAGTAACACGTGGATAATCTGCCCTTAACACAGACATAACCCAGGGAAACTTGGACTAATATCTGATGAGGCCTCCGGG
TCAAAGCTACGGCGGTTAAGGATGAGTCTGCGTATGATTAGCTAGTTGGTAAGGTAATGGCTTACCAAGGCGACGATCAT
TAACTGGTCTGAGAGGACGATCAGTCACACTGGAACTGAGACACGGTCCAGACTCCTACGGGAGGCAGCAGTGAGGAATT
TTGGACAATGGgggAAACCCTGATCCAGCGACGCCGCGTGTGGGATGAATGGGTTATGCCCTGTAAACCACTGTCAGCAG
AGAAGAAAAGGCTCCTTTGGAGCCCGGGACTGTATCTGCAGAGGAAGGACCGGCTAACTACGTGCCAGCCGCCGCCGTAA
CAC
>OTU_23
GATGAACGCTGGCGGCGTGCCTAACACATGCAAGTCGAGCGAGAATTCTTTAGTTGATCCTTCGGGTGATTCTAAAGAAG
GACAGCGGCGGACGGGTGAGTAACGCGTAGGCAACCTGCCCCATACATTGGGATAGCCCTGGGAAACTGGGTGTAATACC
GAATAACACTTTGAAATGGCATCTTTTCAAAGTCAAAACTCCGGTGGTATGGGATGGGCCTGCGTCTGATTAGCTAGTTG
GTAAGGTAATGGCTTACCAAGGCGACGATCAGTAGCCGACCTGAGAGGGTGATCGGCCACACTGGAACTGAGACACGGTC
CAGACTCCTACGGGAGGCAGCAGTGGGGAATATTGCACAATGGGCGAAAGCCTGATGCAGCAACGCCGCGTGAGTGATGA
AGGCTTTCGGGTCGTAAAACTCTGTCCTAAAGGAAGAATAATGACGGTACTTTAGGAGGAAGCCCCGGCTAACTACGTGC
CAGCCGCCGCCGTAACAC
>OTU_24
GACGAACGCTGGCGGCGTGCCTAACACATGCAAGTCGAGCGATGAAATTTTCTTCGGAAAATGGATTAGCGGCGGACGGG
TGAGTAACACGTGAGTAACCTGCCTCAAAGAGGgggATAGCCTTCCGAAAGGGAGATTAATACCGCATAATATCAGATGA
TCGCATGGTCGACTGATTAAAGGAGCAATCCGCTTTGAGATGGACTCGCGGCGCATTAGCTAGTTGGTAAGGTAACGGCT
TACCAAGGCGACGATGCGTAGCCGACCTGAGAGGGTGATCGGCCACATTGGGACTGAGACACGGCCCAGACTCCTACGGG
AGGCAGCAGTGGGGAATATTGCGCAATGGACGAAAGTCTGACGCAGCAACGCCGCGTGGGTGATGAAGGTCTTCGGATTG
TAAAGCCCTGTCTTCGAGGACGATAATGACGGTACTCGAGGAGGAAGCCACGGCTAACTACGTGCCAGCCGCCGCCGTAA
CAC
>OTU_25
ATTGAACGCTGGCGGCAGGCCTAACACATGCAAGTCGAGCGGTAGagagaAGCTTGCTTCTCTTGAGAGCGGCGGACGGG
TGAGTAATGCCTAGGAATCTGCCTGGTAGTGGgggATAACGTTCGGAAACGGACGCTAATACCGCATACGTCCTACGGGA
GAAAGCAGGGGACCTTCGGGCCTTGCGCTATCAGATGAGCCTAGGTCGGATTAGCTAGTTGGTGGGGTAATGGCTCACCA
AGGCGACGATCCGTAACTGGTCTGAGAGGATGATCAGTCACACTGGAACTGAGACACGGTCCAGACTCCTACGGGAGGCA
GCAGTGGGGAATATTGGACAATGGGCGAAAGCCTGATCCAGCCATGCCGCGTgtgtgAAGAAGGTCTTCGGATTGTAAAG
CACTTTAAGTTGGGAGGAAGGGCAGTAAATTAATACTTTGCTGTTTTGACGTTACCGACAGAATAAGCACCGGCTAACTC
TGTGCCAGCCGCCGCCGTAACAC
>OTU_26
GACGAACGCTGGCGGCAGGCTTAACACATGCAAGTCGAACGCCCTCTTCGGAGGGAGTGGCAGACGGGTGAGTAACGCGT
GGGAATCTACCCTATTCTACGGAACAACAGTTAGAAATGACTGCTAATACCGTATACGCCCTCCGGgggAAAGATTTATC
GGAGTAGGATGAGCCCGCGTTTGATTAGCTAGTTGGTGAGGTAATGGCTCACCAAGGCGACGATCAATAGCTGGTCTGAG
AGGATGATCAGCCACACTGGGACTGAGACACGGCCCAGACTCCTACGGGAGGCAGCAGTGGGGAATATTGGACAATGGGC
GCAAGCCTGATCCAGCCATGCCGCGTgtgtgATGAAGGCCCTAGGGTTGTAAAGCACTTTCAACGGTGAAGATAATGACG
GTAACCGTAGAAGAAGCTCCGGCTAACTTCGTGCCAGCCGCCGCCGTAACAC
>OTU_27
AATGAACGCTGGCGGCGTGGATAAGACATGCAAGTCGAACGAAGagagaTTTAGTTTACTAATGATCTCTTAGTGGCGGA
CGGGTTAGTAACGCGTGAGCAACTTGCCTCAAAGAGGgggATAGTCCTGGGAAACTGGGTTTAATACCGCATGTGCTCTT
CGGAGTAAAGCTGGCTTCGGCTGGTGCTTTGAGATAGGCTCGCGTCCTATCAGCTAGTTGGTGAGGTAACGGCTCACCAA
GGCGACGACGGGTAGTTGGTCTGAGAGGACGATCAGCAACACTGGAACTGAGACACGGTCCAGACACCTACGGGTGGCAG
CAGTCGAGAATCATTCACAATGGgggCAACCCTGATGGTGCAACGCCGCGTGGAGGATGAAGGCCCTAGGGTCGTAAACT
CCTGTCATATGAGAGTAAGGCATATTAGTTAATAGCTAGTATGTTTGATAGTATCATAAGAGGAAGGGACGGCTAACTTC
GTGCCAGCCGCCGCCGTAACAC
>OTU_28
AATGAACGTTGGCGGCATGGATTAGGCATGCAAGTCGAGCGAGAAGGTTATGATTGACGCTTCGGTTGATTTCATAGCTG
GACAGCGGCGCAAGGGTGAGTAACGCGTAGTTATCTGCCCGAGGGTTCGGGATAGCCACGGGAAACTGTGGGTAATACCG
AATAACATCTCCGGATCAAAGGTGTGATTCCGCCCTCGGAGGGGACTGCGTTCTACTAGCTTGTTGGTGGGGTAATGGCC
TACCAAGGCTTTGATGGATAGCGGGCGTGAGAGCGTGGCCCGTCACACTGGGACTGAGACACTGCCCAGACACCTACGGG
TGGCTGCAGTCGAGAATCTTCGGCAATGGGCGAAAGCCTGACCGAGCAATGCCGCGTGCGGGATGAAGGCCCTCGGGTTG
TAAACCGCGAAAGTGAGGAGGAAGGGCCCGTGAAGAGCGGGTCTTGACCGATACACAGTAAGGACGGGCTAAGTTCGTGC
CAGCCGCCGCCGTAACAC
>OTU_29
AATGAACGCTATAAGTATGCTTAACACATGCAAGTTTAACGGAAATTtttttCGTAGCGTACGGGTGAGTAGTAGCAGAA
TTTTACCTTTTAGTTCAGCACAAAGACTTTTATAAGTTTAAATACTGAATATTtttAAAGGTTAGTAATTtttCCGCTAA
AAGATAAATCTGCATAAGATTATGGTTGTTGGTAATTTAAAAGCTTACCAAGCCTATGATCTTTAGTTGGTCTGAGAGGA
TGATCAACCACACTAGAACTGAAACAAGGTTTAGGCTGAATTTTCGGCCAGCAGTGAGGAATATTGGACAATGAACGAAA
GTTTGATCCAGCAATACTAACTAGGTGACGACGGCTTATTTAAGTTGTAAAGCCTTTTCATTAAAGAAGATAATGACATT
ATTTAATGTAATAAGTCCTGGCTAATACTCGTGCCAGCCGCCGCCGTAACAC
>OTU_30
GATGAACGCTGGCGGTGCGCCTAACACATGCAAGTCGAGCGAGATTATTATTTGAGATTTCTTCGGAATGATCTGTTAAT
ATGAAAGCGGCGAACGGGTGAGTAACACGTTGATACCTGCCCTCAACTCAGGGATAGCCCATCGAAAGATGGATTAATAC
CGGATAGTCCCTACGGGGTAAAGATTTATCGGTTGAGGAGGGGTCTGCGGCCTATCAGCTAGTAGGTAGTGTAATAGACT
ACCTAGGCAATGACGGGTAGCTGGTCTGAGAGGATGATCAGCCACAATGGAACTGAGACACGGTCCATACACCTACGGGT
GGCAGCAGTGAGGAATCTTCCGCAATGGGCGAAAGCCTGACGGAGCGACACCGCGTGGAGGATGACAGCTTTGTTGTTGT
AAACTCCTTTTGTGAAGGAAGATAATGACGGTACTTCACGAATAAGGGACGGCTAACTACGTGCCAGCCGCCGCCGTAAC
AC
>OTU_31
AATGAACGTTGGCGGCGTGGATTAGGCATGCAAGTCGAGCGCGAAGGTTTCTTTTGCTTGCATTAGAAACTGGAAAGCGG
CGAAAGGGAGAGTAACGCGTAGAATACCTGCCCCGAGGCCTGGGATAGCGGTGGGAAACCGCCGGTAATACCAGATAATG
TTTCCGAACCAAAGGTGTGATTCCGCCTCGGGATGGTTCTGCGTCCTATTAGCTTGTTGGTGGGGTAATAGCCTACCAAG
GCAATGATGGGTAGCGGGCGTGAGAGCGTGGCCCGTCTCACTGGGACTGAGACACTGCCCAGACACCTACGGGTGGCTGC
AGTCGAGAATCTTCCGCAATGGACGAAAGTCTGACGGAGCGACGCCGCGTGCGGGATGAAGGCCTTCGGGTTGTAAACCG
CTGTCAGTGGGGTGGAAATGTATTGAGGTTCTCCTCTTTATTTGACCTAACCGCAGAGGAAGTCCGGGCTAAGTACGTGC
CAGCCGCCGCCGTAACAC
>OTU_32
AACGAACGCTGGCGGCAGGCTTAACACATGCAAGTCGAACGCTCACTTCGGTGAGAGTGGCAGACGGGTGAGTAACGCGT
GGGAATATACCTATCAGTACGGAACAACAGTTGGAAACGACTGCTAATACCGTATACGCCCTTCGGgggAAAGATTCATC
GCTGATAGATTAGCCCGCGTTAGATTAGCTAGTTGGTGGGGTAAAGGCCTACCAAGGCGACGATCTATAGCTGGTCTGAG
AGGATGATCAGCCACACTGGGACTGAGACACGGCCCAGACTCCTACGGGAGGCAGCAGTGGGGAATATTGGACAATGGGC
GCAAGCCTGATCCAGCCATGCCGCGTgtgtgATGAAGGCCTTAGGGTTGTAAAGCACTTTCAACGGTGAAGATAATGACG
GTAACCGTAGAAGAAGCCCCGGCTAACTTCGTGCCAGCCGCCGCCGTAACAC
>OTU_33
AACGAACGCTGGCGGCAGGCTTAACACATGCAAGTCGAACGCCCTCTTCGGAGGGAGTGGCAGACGGGTGAGTAACGCGT
GGGAACCTACCTTTAGGTACGGAATAACAGTTAGAAATGACTGCTAATACCGTATGTGCCCGAGAGGGGAAAGATTTATC
GCCTTTAGATGGGCCCGCGTTGGATTAGCTAGTTGGTGAGGTAACGGCTCACCAAGGCGACGATCCATAGCTGGTTTGAG
AGGATGATCAGCCACACTGGGACTGAGACACGGCCCAGACTCCTACGGGAGGCAGCAGTGGGGAATATTGGACAATGGgg
gAAACCCTGATCCAGCCATGCCGCGTGAGTGATGAAGGCCTTAGGGTTGTAAAGCTCTTTCGCTGGGGAAGATAATGACG
GTACCCAGTAAAGAAGCCCCGGCTAACTTCGTGCCAGCCGCCGCCGTAACAC
>OTU_34
GATGAACGCTAGTAGTATGCTTAACACATGCAAGTCGTACGGAATatatTTTCGTGGCGAACGGGTGAGTAAACGCAGAA
TTTTCCCTTATAGTTCAGCACAAATACTCTTTTAGAGTAAAATTCTGAATATTTCTTAAAGGTACTTtttAAGTTTCCGC
TATAAGATAAATCTGCTTAAGATTAGGTTGTTGGTAATTTAAAAGCTTACCAAGCCTACGATCTTTAGTTGGTCTTAGAG
GATGATCAACCACACTGGAACTGAAATAAGGTCCAGGCTGACATGTCGGCCAGCAGTGAGGAATATTGGACAATGAACGA
AAGTTTGATCCAGCAATACTAACTGGGTGACGACGGCTTATTTAAGTTGTAAGATCCTTTAATTAAAGAAGATAATGACA
TTATTTAATTGAATTTAGTCCTGGCTAATACTCGTGCCAGCCGCCGCCGTAACAC
>OTU_35
GATGAACGCTGGCGGCGTGCTTAACACATGCAAGTCGAGCGAGAAGGCTATGACTGATTCTTCGGATGAAGGAATAGCTG
GAAAGCGGCGGACGGGTGAGTAACGCGTGGGTAACCTGCCTTGTACAGAGGGATAGCCACTGGAAACGGTGATTAATACC
TCATAAAACTATAGCGTCGCATGGCGCAATAGTCAAAACTCAGGTGGTACAAGATGGACCCGCGTCTGATTAGCTAGTTG
GTGGGGTAAAGGCCTACCAAGGCGACGATCAGTAGCCGACCTGAGAGGGTGATCGGCCACACTGGAACTGAGACACGGTC
CAGACTCCTACGGGAGGCAGCAGTGGGGAATATTGCACAATGGGCGAAAGCCTGATGCAGCAACGCCGCGTGAGTGAAGA
AGGCTTTCGGGTCGTAAAACTCTGTCCTAAGGGAAGAATAATGACGGTACCTTAGGAGGAAGCCCCGGCTAACTACGTGC
CAGCCGCCGCCGTAACAC
>OTU_36
AACTAACGCTGGCGGCGCGTCTTAAACATGCAAGTCGAACGGTGAAAATGAGGCTTCGGCCGAAACACGAGTGGCGAACG
GGTGAGTAACACGTAGGTAATCTACCTTTCAGTGGgggACAACTCAGGGAAACTTGAGCTAATACCGCATATTCCATTTG
ATCCACGGGTCGAATGGTGAAAGCCTTCGGGCGCTGATTGATGAGCCTGCGTCCTATTAGCTTGTTGGTGGGGTAACGGC
CCACCAAGGCGACGATGGGTAGCCGGCCTGAGAGGGTGATCGGCCACACTGGAACTGAGACACGGTCCAGACTCCTACGG
GAGGCAGCAGTTAAGAATCTTGCGCAATGGgggCAACCCTGACGCAGCGACGCCGCGTGAAGGACGAAGGCTCTCGGGTT
GTAAACTTCAATAAACAGGGAAGAATTTTGACGGTACCTGTTGATAGCACCGGCTAAATACGTGCCAGCCGCCGCCGTAA
CAC
>OTU_37
GATGAACGCTGGCGGCATGGATTAGGCATGCAAGTCGAACGAAGAATTTGAAGCTTGCTTCAAAGGACGAGTGGCGAAAG
GGTGAGTAACGCGTGAGTAATTTACCCTCAAGTTGGGAATAACACTTGGAAACGAGTGCTAATACCGAATGTGGATatat
aAACGCCTGTTTAAATATCTAAAGATTTATTGCTTGAGGATGGGCTCGCGTCCCATTAGCTAGTTGGTGAGGTAACGGCT
CACCGAGGCAACGATGGGTAGGTGGTCTGAGAGGATGGTCACCCACACTGGGACTGAGACACTGCCCAGACTCCTACGGG
AGGCTGCAGTCGAGAATCTTCCGCAATGCGCGAAAGCGTGACGGAGCAATGCCGCGTGATTGATGAAGGCCTTAGGGTTG
TAAAGATCTGTCAACAGGGACGAATAAATGACGGTACCTGTAGAGGAAGCCACGGCTAACTACGTGCCAGCCGCCGCCGT
AACAC
>OTU_38
AGCGAACGCTGGCGGCAGGCCTAACACATGCAAGTCGAACGAAGTCTTCGGACTTAGTGGCGGACGGGTGAGTAACACGT
GGGAACGTGCCTTTAGGTTCGGAATAACTCAGGGAAACTTGTGCTAATACCGAATGTGCCCTTCGGgggAAAGATTTATC
GCCTTTAGAGCGGCCCGCGTCTGATTAGCTAGTTGGTGAGGTAAAGGCTCACCAAGGCGACGATCAGTAGCTGGTCTGAG
AGGATGATCAGCCACATTGGGACTGAGACACGGCCCAAACTCCTACGGGAGGCAGCAGTGGGGAATCTTGCGCAATGGGC
GAAAGCCTGACGCAGCCATGCCGCGTGAATGATGAAGGTCTTAGGATTGTAAAATTCTTTCACCGGGGACGATAATGACG
GTACCCGGAGAAGAAGCCCCGGCTAACTTCGTGCCAGCCGCCGCCGTAACAC
>OTU_39
GACGAACGCTGGCGGCGTGCCTAATACATGCAAGTCGAGCGAAGAGAAGTAGAGCTTGCTCTACGGATCTTAGCGGCGGA
CGGGTGAGTAACACGTGGGTAACCTGCCTATTAGACTGGGATAACCCCGGGAAACCGGAGCTAATACCAGATAAGCTGAT
ACTACAGAAGTAGATATCAGGGAAAGATGGCGTAAGCTATCACTAATAGATGGGCCCGCGTCGCATTAGCTAGTTGGTGG
GGTAAAGGCCTACCAAGGCGACGATGCGTAGCCGACCTGAGAGGGTGATCGGCCACACTGGGACTGAGACACGGCCCAGA
CTCCTACGGGAGGCAGCAGTAGGGAATCTTCCGCAATGGACGAAAGTCTGACGGAGCAACGCCGCGTGAGTGATGAAGGT
TTTCGGATCGTAAAACTCTGTCATTAGGGAAGAACAGTTGTAGTTTAAATAAGGCTATGATGTGACGGTACCTAAAGAGG
AAGCCCCGGCTAACTACGTGCCAGCCGCCGCCGTAACAC
>OTU_40
ATTGAACGCTGGCGGCAGGCCTAACACATGCAAGTCGAGCGGAAACGAGTTATCAAAGCCTTCGGGTGGAGATAACGGCG
TCGAGCGGCGGACGGGTGAGTAATGCCTGGGAAATTGCCCTGATGTGGgggATAACCATTGGAAACGATGGCTAATACCG
CATAATAGCTTCGGCTCAAAGAGGgggACCTTCGGGCCTCTCGCGTCAGGATATGCCCAGGTGGGATTAGCTAGTTGGTG
AGGTAATGGCTCACCAAGGCGACGATCCCTAGCTGGTCTGAGAGGATGATCAGCCACACTGGAACTGAGACACGGTCCAG
ACTCCTACGGGAGGCAGCAGTGGGGAATATTGCACAATGGGCGCAAGCCTGATGCAGCCATGCCGCGTGTATGAAGAAGG
CCTTCGGGTTGTAAAGTACTTTCAGCAGTGAGGAAGGTGGTGTCGTTAATAGCGGCATCATTTGACGTTAGCTGCAGAAG
AAGCACCGGCTAACTCCGTGCCAGCCGCCGCCGTAACAC
>OTU_41
ATTGAACGCTGGCGGCAGGCTTAACACATGCAAGTCGAGCGGAAACGATGGGAGCTTGCTCCCAGGCGTCGAGCGGCGGA
CGGGTGAGTAACACTTAGGAATCTACCTAGTAGTGGgggATAGCTCGGGGAAACTCGAATTAATACCGCATACGTCCTAC
GGGAGAAAGGgggCAGTTTACTGCTCTCGCTATTAGATGAGCCTAAGTCGGATTAGCTAGATGGTGGGGTAAAGGCCTAC
CATGGCGACGATCTGTAGCTGGTCTGAGAGGATGATCAGCCACACCGGGACTGAGACACGGCCCGGACTCCTACGGGAGG
CAGCAGTGGGGAATATTGGACAATGGgggAAACCCTGATCCAGCCATGCCGCGTgtgtgAAGAAGGCCTTTTGGTTGTAA
AGCACTTTAAGCAGTGAAGAAGACCTAACGGTTAATACCCGTTAGCGATGACATTAGCTGCAGAATAAGCACCGGCTAAC
TCTGTGCCAGCCGCCGCCGTAACAC
>OTU_42
GACGAACGCTGGCGGCGTGCTTAACACATGCAAGTCGAGCGATGAAACTTCCTTCGGGAAGTGGATTAGCGGCGGACGGG
TGAGTAACACGTGAGTAACCTGCCTCAAAGAGGgggATAGCCTTCCGAAAGGAAGATTAATACCGCATAATATACAGAGA
TCACATGTTCTCTGTATCAAAGGAGCAATCCGCTTTGAGATGGACTCGCGGCGCATTAGCTAGTTGGTAGGGTAACGGCC
TACCAAGGCGACGATGCGTAGCCGACCTGAGAGGGTGATCGGCCACATTGGGACTGAGACACGGCCCAGACTCCTACGGG
AGGCAGCAGTGGGGAATATTGCGCAATGGGCGAAAGCCTGACGCAGCAACGCCGCGTGGGTGATGACGGTCTTCGGATTG
TAAAACCCTGTCTTCAGGGACGATAATGACGGTACCTGAGGAGGAAGCCACGGCTAACTACGTGCCAGCCGCCGCCGTAA
CAC
>OTU_43
AATGAACGTTGGCGGCGTGGATTAGGCATGCAAGTCGTGCGAGAAGTTCTTTTAGCTTGCTTTAAGAACGGACAGCGGCG
AAAGGGAGAGTAACGCGTGGTTACGTGCCCCGAGGTCCAGGATAGCGTTGGGAAACCGGCGGTAATACTGGATGATATCT
TCGGATCAAAGGTGTGATTCCGCCTTGGGATCGGACCGCGTACTATTAGCTTGTTGGTGGGGTAATGGCCTACCAAGGCT
GCGATGGTTACCGGGTGTGAGAGCATGGCCCGGCTCACTGGGACTGAGACACTGCCCAGACACCTACGGGTGGCTGCAGT
CGAGAATCTTCGGCAATGGACGAAAGTCTGACCGAGCGACGCCGCGTGCGGGATGAAGGCCCTCGGGTTGTAAACCGCTG
TCAGTTGGGAGGAAAGCTTTGTGAAGAGCAAAGCTTGACCGATCTTCAGAGGAAGGACGGGCTAAGTTCGTGCCAGCCGC
CGCCGTAACAC
>OTU_44
AATGAACGTTGGCGGCGTGGATTAGGCATGCAAGTCGAGCGAGAAGCTTttttAAGATACTTCGGTTGATTtttAAAGTG
GACAGCGGCGAAAGGGAGAGTAACGAGTAGATACGTACCCAGGGGTTCGGGATAGCCATGCGAAAGCGTGAGTAATACCG
AATAATGTCTCCGGACCAAAGATTTATTGCCCTTGGAGCGGTTTGCTTACTATTAGCTAGTTGGTGGGGTAAAGGCCTAC
CAAGGCAAAGATGGTTAGCGGGTGTGAGAGCATGGCCCGTCTCACTGGGACTGAGACACTGCCCAGACACCTACGGGTGG
CTGCAGTCGAGAATCTTCCGCAATGGACGAAAGTCTGACGGAGCGACGCCGCGTGCTGGATGAAGGCCCTCGGGTTGTAA
ACAGCTGTCGTAGGGGAGGAAATTTTGACCGATCCTAGGAGGAAGCACAGGCTAAGTTCGTGCCAGCCGCCGCCGTAACA
C
>OTU_45
GATGAACGCTGGCGGCGTGCTTAACACATGCAAGTCGAGCGAGAAGTTACCTAAGGAATCTTCGGAGGAATTAAGTAATG
GAAAGCGGCGGACGGGTGAGTAACGCGTGGATAACCTACCCTGAACAGGgggACAACAGTTAGAAATGACTGCTAATACC
CCATAAGACTACGATATCGCATGATAAAGTAGTAAaaaCTCCGGTGGTACAGGATGGATCCGCGTCTGATTAGCTAGTTG
GTAAGGTAAAAGCTTACCAAGGCGACGATCAGTAGCCGGCCTGAGAGGGTGGACGGCCACATTGGGACTGAGACACGGCC
CAAACTCCTACGGGAGGCAGCAGTGGGGAATATTGCACAATGGgggAAACCCTGATGCAGCGACGCCGCGTGAAGGAAGA
AGGTTTTCGGATCGTAAACTTCTATCAGCAGGGAAGAAAATGACGGTACCTGACTAAGAAGCCCCGGCTAACTACGTGCC
AGCCGCCGCCGTAACAC
>OTU_46
AACGAACGCTGGCGGCATGCCTAATACATGCAAGTCGAACGAGATCTTCGGATCTAGTGGCGCACGGGTGCGTAACGCGT
GGGAATCTGCCCTTGGGTTCGGAATAACTTCTGGAAACGGAAGCTAATACCGGATGATGACGTAAGTCCAAAGATTTATC
GCCCAAGGATGAGCCCGCGTAGGATTAGCTAGTTGGTGGGGTAAAGGCCCACCAAGGCGACGATCCTTAGCTGGTCTGAG
AGGATGATCAGCCACACTGGGACTGAGACACGGCCCAGACTCCTACGGGAGGCAGCAGTAGGGAATATTGGACAATGGGC
GAAAGCCTGATCCAGCAATGCCGCGTGAGTGATGAAGGCCTTAGGGTTGTAAAGCTCTTTTACCCGGGATGATAATGACA
GTACCGGGAGAATAAGCTCCGGCTAACTCCGTGCCAGCCGCCGCCGTAACAC
>OTU_47
GATGAACGCTAGCGGGAGGCTTAATACATGCAAGTCGAGGGGTAACATGAGAGCTTGCTCTTGATGACGACCGGCGCACG
GGTGAGTAACGCGTACACAATCTGCCCTTAAGTGGGGAATAGCCCTGGGAAACTGGGATTAATGCCCCATAGTATTCAAC
TATCGCATGATAGATGAATTAAAGTTCCGATGCTTAAGGATGAGTGTGCGTCCCATTAGCTTGTTGGTAAGGTAACGGCT
TACCAAGGCAACGATGGGTAGGgggCGTGAGAGCGTGATCCcccACACGGGTACTGAGACACGGACCCGACTCCTACGGG
AGGCAGCAGTAAGGAATATTGGACAATGCCCGAAAGGGTGATCCAGCCATCCCGCGTGAAGGAAGACTGCCCTACGGGTT
GTAAACTTCTTTTAtataCCAAGAAACCCCGGGATTCATCCCGGGCTGACGGTAGTATATGAATAAGCACCGGCTAACTC
CGTGCCAGCCGCCGCCGTAACAC
>OTU_48
GATGAACGCTGGCGGCGTGCTTAACACATGCAAGTCGAGCGAGAAACTACTTATTGAACCTTCGGgggATATAAGTAGTG
GAAAGCGGCGGACGGGTGAGTAACGCGTGGGTAACCTGCCCTATGCAGGgggATAACACATTGAAAAGTGTGCTAATACC
GCATAAGACCACAAAGTCGCATGACATAGTGGTAAaaaCTCCGGTAGCATAGGATGGACCCGCGTCTGATTAGCTAGTAG
GTAAGGTAACGGCTTACCTAGGCGACGATCAGTAGCCGACCTGAGAGGGTGATCGGCCACATTGGGACTGAGACACGGCC
CAAACTCCTACGGGAGGCAGCAGTGGGGAATATTGCACAATGGgggAAACCCTGATGCAGCGACGCCGCGTGAAGGAAGA
AGGTTTTCGGATCGTAAACTTCTATCAGCAGGGAAGATAGTGACAGTACCTGACTAAGAAGCCCCGGCTAACTACGTGCC
AGCCGCCGCCGTAACAC
>OTU_49
AACGAACGCTGGCGGCAGGCTTAACACATGCAAGTCGAACGAACTCTTCGGAGTTAGTGGCAGACGGGTGAGTAACGCGT
GGGAATATACCTTTCGGTACGGAACAACAGTTGGAAACGGCTGCTAATACCGTATACGCCCTATGGgggAAAGATTTATC
GCCGAGGGATTAGCCCGCGTTAGATTAGCTAGTTGGTGAGGTAATGGCTCACCAAGGCGACGATCTATAGCTGGTCTGAG
AGGATGATCAGCCACACTGGGACTGAGACACGGCCCAGACTCCTACGGGAGGCAGCAGTGGGGAATATTGGACAATGGgg
gCAACCCTGATCCAGCCATGCCGCGTGAGTGATGAAGGCCCTAGGGTTGTAAAGCTCTTTCAGCGAGGAGGATAATGACG
TTACTCGCAGAAGAAGCCCCGGCTAACTTCGTGCCAGCCGCCGCCGTAACAC
>OTU_50
GATGAACGCTGGCGGCGTGCTTAACACATGCAAGTCGAGCGAGAAGTTAACTATTGATTCTTCGGATGATTTAGTTAATG
GACAGCGGCGGACGGGTGAGTAACGCGTGGGTAACCTGCCCTACACTGGgggACAACAGTTGGAAACGACTGCTAATACC
GCATAAGACTACGGTATCGCATGATACAGTAGTAAaaaCTCCGGTGGTGTAGGATGGACCCGCGTCTGATTAGCTAGTTG
GTGAGGTAATGGCTCACCAAGGCGACGATCAGTAGCCGGCCTGAGAGGGTGGACGGCCACATTGGGACTGAGACACGGCC
CAAACTCCTACGGGAGGCAGCAGTGGGGAATATTGCACAATGGgggAAACCCTGATGCAGCGACGCCGCGTGAAGGAAGA
AGGTTTTCGGATCGTAAACTTCTATCAGCAGGGAAGAAAGTGACGGTACCTGACTAAGAAGCCCCGGCTAACTACGTGCC
AGCCGCCGCCGTAACAC
>OTU_51
AATGAACGTTGGCGGCGTGGATTAGGCATGCAAGTCGTGCGAGAAGCTTCCTTCGGGAAGTGGACAGCGGCGAAAGGGAG
AGTAATACGTAGAAATCTGCCCCGGAGTCTGGGATAGCGTCGGGAAACTGGCGGTAATACCGGATAACGTCTTCGGACCA
AAGGTGTGATTCCGCTCTGGGATGAGTCTACGACCTATTAGCTAGTTGGCGGGGTAATGGCCCACCAAGGCGACGATGGG
TAGCGGGTGTGAGAGCATGGCCCGCCTCACTGGGACTGAGACACTGCCCAGACATCTACGGATGGCTGCAGTCGAGAATC
TTTGTCAATGGACGAAAGTCTGAACAAGCGACGCCGCGTGCGGGATGAAGGCCCTCGGGTTGTAAACCGCTGTCGTAAGG
GAACAAATCTATAGGGGTTCtctcCTATAGTTGAGTGATCTTAGGAGGAAGGACGGGCTAAGTTCGTGCCAGCCGCCGCC
GTAACAC
>OTU_52
AACGAACGCTGGCGGCAGGCTTAAGACATGCAAGTCGAGCGCACCCTTCGGGGTGAGCGGCGGACGGGTGAGTAACGCGT
GGGAACGTGCCTTTCTCTAAGGAATAGCCTCTGGAAACGGAGAGTAATACCTTATACGCCCTTCGGgggAAAGATTTATC
GGAgagagaTCGGCCCGCGTTGGATTAGGTAGTTGGTGGGGTAATGGCCTACCAAGCCGACGATCCATAGCTGGTTTGAG
AGGATGATCAGCCACACTGGGACTGAGACACGGCCCAGACTCCTACGGGAGGCAGCAGTCGGGAATCTTGGACAATGGgg
gAAACCCTGATCCAGCCATGCCGCGTgtgtgACGAAGGCCCTAGGGTCGTAAAGCACTTTCGCCAGGGATGATAATGACA
GTACCTGGTAAAGAAACCCCGGCTAACTCCGTGCCAGCCGCCGCCGTAACAC
>OTU_53
AATGAACGTTGGCGGCATGGATTAGGCATGCAAGTCGCACGAGAAACCAATTAGCTTGCTATGAGGTGGACAGTGGCGAA
AGGGAGAGTAACGTGTGGTTACTTGCCCTCCAGACCGGGATAGCGTCGGGAAACTGGCGGTAATACCGGATAACATCTTC
GGATCAAATGGTGTGATTCCGCTGGAGGATAGGACCGCATACTATTAGCTTGTTGGTGAGGTAACGGCTCACCAAGGCTG
CGATGGTTACCGGGTGTGAGAGCATGGCCCGGCTCACTGGGACTGAGACACTGCCCAGACATCTACGGATGGCTGCAGTC
GAGAATCTTCGGCAATGGACGAAAGTCTGACCGAGCGATGCCGCGTGCGGGATGAAGGCCCTCGGGTTGTAAACCGCTGT
CAGTTGTTAGGAAATGCTATAGGGTTCtctctATAGTTTGACCGATCTTCAGAGGAAGGACGGGCTAAGTTCGTGCCAGC
CGCCGCCGTAACAC
>OTU_54
GACGAACGCTGGCGGCGTGCCTAACACATGCAAGTCGAGCGATGAAGCTTCCTTCGGGAAGTGGATTAGCGGCGGACGGG
TGAGTAACACGTGAGCAACCTGCCTCAAAGAGGgggATAGCCTCCCGAAAGGGAGATTAATACCGCATAATATCAGAAAT
TCGCATGTTtttCTGATTAAAGGAGTAATCCACTTTGAGATGGGCTCGCGGCGCATTAGCTAGTTGGTGAGGTAACGGCT
CACCAAGGCGACGATGCGTAGCCGACCTGAGAGGGTGATCGGCCACATTGGGACTGAGACACGGCCCAGACTCCTACGGG
AGGCAGCAGTGGGGAATATTGCGCAATGGACGAAAGTCTGACGCAGCAACGCCGCGTGGGTGATGAAGGTCTTCGGATTG
TAAAGCCCTGTCTTCGAGGACGATAATGACGGTACTCGAGGAGGAAGCCACGGCTAACTACGTGCCAGCCGCCGCCGTAA
CAC
>OTU_55
AACGAACGCTGGCGGCAGGCCTAACACATGCAAGTCGAACGAACCTTCGGGTGAGTGGCGCACGGGTGCGTAACGCGTGG
GAATATACACATAGGTGAGGAATAACGTAGAGAAATTTGCGCTAATACCTCATAATGACTCCGGTCCAAAGATTTATCGC
CTATGAATTAGCCCGCGTCAGATTAGATAGTTGGTGAGGTAAAGGCTCACCAAGTCTACGATCTGTAGGgggTCTGAGAG
GATGATCCcccACACTGGTACTGAGACACGGACCAGACTCCTACGGGAGGCAGCAGTGAGGAATATTGGACAATGGgggC
AACCCTGATCCAGCCATGCCGCGTGAGTGAAGAAGGCCTTAGGGTTGTAAAGCTCTTTCAATAGTGAAGATAATGACGGT
AACTATACAAGAAGCTCCGGCTAAATTCGTGCCAGCCGCCGCCGTAACAC
>OTU_56
ATTGAACGCTAGCGGCATGCCTAACACATGCAAGTCGAACGGCAGCGCGAGGAGCTTGCTCCTTGGCGGCGAGTGGCGGA
CGGGTGAGTAACGCGTAGGAATCTGCCTAGTAGTGGgggACAACTCGGGGAAACTCGAGCTAATACCGCATAATCTCTAC
GGAGCAAAGTGGgggACCTTTTGGCCTCACGCTATTAGATGAGCCTGCGTCAGATTAGATTGTTGGTGGGGTAATGGCCT
ACCAAGTCGACGATCTGTAGCTGGTCTGAGAGGATGACCAGCCACACTGGGACTGAGACACGGCCCAGACTCCTACGGGA
GGCAGCAGTGGGGAATATTGGACAATGGGCGAAAGCCTGATCCAGCAATGCCGCGTgtgtgAAGAAGGCCTTCGGGTTGT
AAAGCACTTTCAATAGGGAAGAAaaaGCCAAAGATAATACCTTTGGAAATTGACGTTACCTATAGAAGAAGCACTGGCTA
ACTCTGTGCCAGCCGCCGCCGTAACAC
>OTU_57
ATTGAACGCTGGCGGCAGGCCTAACACATGCAAGTCGAGCGGAAACGACACTAACAATCCTTCGGGTGCGTTAATGGGCG
TCGAGCGGCGGACGGGTGAGTAATGCCTAGGAAATTGCCTTGATGTGGgggATAACCATTGGAAACGATGGCTAATACCG
CATGATGCCTACGGGCCAAAGAGGgggACCTTCGGGCCTCTCGCGTCAAGATATGCCTAGGTGGGATTAGCTAGTTGGTG
AGGTAATGGCTCACCAAGGCGACGATCCCTAGCTGGTCTGAGAGGATGATCAGCCACACTGGAACTGAGACACGGTCCAG
ACTCCTACGGGAGGCAGCAGTGGGGAATATTGCACAATGGGCGCAAGCCTGATGCAGCCATGCCGCGTGTATGAAGAAGG
CCTTCGGGTTGTAAAGTACTTTCAGTTGTGAGGAAGGgggTAGTGTTAATAGCGCTATCTCTTGACGTTAGCAACAGAAG
AAGCACCGGCTAACTCCGTGCCAGCCGCCGCCGTAACAC
>OTU_58
AACGAACGCTGGCGGCAGGCTTAACACATGCAAGTCGAACGATCCCTTCGGGGATAGTGGCAGACGGGTGAGTAACGCGT
GGGAACCTACCTTTAGGTACGGAACAACAGTTGGAAACGACTGCTAATACCGTATGTGCCCTATGGgggAAAGATTTATC
GCCTAAGGATGGGCCCGCGTTGGATTAGCTAGTTGGTGGGGTAATGGCCTACCAAGGCGACGATCCATAGCTGGTCTGAG
AGGATGATCAGCCACACTGGGACTGAGACACGGCCCAGACTCCTACGGGAGGCAGCAGTGGGGAATATTGGACAATGGgg
gCAACCCTGATCCAGCCATGCCGCGTGAGTGATGAAGGCCCTAGGGTTGTAAAGCTCTTTCAGCGAGGAGGATAATGACG
TTACTCGCAGAAGAAGCCCCGGCTAACTTCGTGCCAGCCGCCGCCGTAACAC
>OTU_59
AACGAACGCTGGCGGCAGGCCTAACACATGCAAGTCGAACGAAGCCTTCGGGCTTAGTGGCGGACGGGTGAGTAACGCGT
GGGAACGTGCCCTTCTCTACGGAATAGTCCTGGGAAACTGGGTTTAATACCGTATACGCCCTTCGGgggAAAGAATTTCG
GGGAAGGATCGGCCCGCGTTGGATTAGGTAGTTGGTGGGGTAATGGCCCACCAAGCCGACGATCCATAGCTGGTTTGAGA
GGATGATCAGCCACACTGGGACTGAGACACGGCCCAGACTCCTACGGGAGGCAGCAGTGGGGAATCTTAGACAATGGggg
CAACCCTGATCTAGCCATGCCGCGTGAGTGACGAAGGCCCTAGGGTCGTAAAGCTCTTTCGCCAGGGATGATAATGACAG
TACCTGGTAAAGAAACCCCGGCTAACTCCGTGCCAGCCGCCGCCGTAACAC
>OTU_60
ATTGAACGCTAGCGGTATGCTTAACACATGCAAGTCGAACGGTAACAGGCCCAGCTTGCTGGGTGCTGACGAGTGGCGGA
CGGGTGAGTAACGCGTAGGAATCTACCTTAAAGTGGgggATAACCTGAGGAAACTCAGGCTAATACCGCATGTGCCTTAA
GAGGTAAAGCAGGGGATCTTCGGACCTTGTGCTTTAAGATGAGCCTGCGTCGGATTAGCTTGTTGGTGGGGTAAAGGCCT
ACCAAGGCGACGATCCGTAGCTGGTCTGAGAGGATGATCAGCCACACTGGGACTGAGACACGGCCCAGACTCCTACGGGA
GGCAGCAGTGGGGAATATTGGACAATGGGCGAAAGCCTGATCCAGCAATACCGCGTgtgtgAAGAAGGCCTGAGGGTTGT
AAAGCACTTTCAGTAGGGAGGAAGGACTTAGTATTAATACTGCTAAGTATTGACGTTACCTACAGAAGAAGCACCGGCTA
ACTCTGTGCCAGCCGCCGCCGTAACAC
>OTU_61
ATTGAACGCTGGCGGCAGGCCTAACACATGCAAGTCGAGCGGATGACGGGAGCTTGCTCCTTGATTCAGCGGCGGACGGG
TGAGTAATGCCTAGGAATCTGCCTGGTAGTGGgggACAACGTTTCGAAAGGAACGCTAATACCGCATACGTCCTACGGGA
GAAAGCAGGGGACCTTCGGGCCTTGCGCTATCAGATGAGCCTAGGTCGGATTAGCTTGTTGGTGAGGTAATGGCTCACCA
AGGCGACGATCCGTAACTGGTCTGAGAGGATGATCAGTCACACTGGAACTGAGACACGGTCCAGACTCCTACGGGAGGCA
GCAGTGGGGAATATTGGACAATGGGCGAAAGCCTGATCCAGCCATGCCGCGTgtgtgAAGAAGGTCTTCGGATTGTAAAG
CACTTTAAGTTGGGAGGAAGGGCAGTAAGTTAATACCTTGCTGTTTTGACGTTACCGACAGAATAAGCACCGGCTAACTC
TGTGCCAGCCGCCGCCGTAACAC
>OTU_62
AATGAACGTTGGCGGCGTGGATTAGGCATGCAAGTCGAGCGAGAAGCTTTTAATTGATCCTTCGGGTGATTTTAAAAGTG
GACAGCGGCGAAAGGGAGAGTAACACGTAGATCACGTACCCAGGGGTTCGGGATAGCGGggggAAACCGCCGGTAATACC
GAATGATGTCTCCGGACCAAAGATTTATCGCCCTTGGAGCGGTCTGCGTCCTATTAGTTTGTTGGTGAGGTAAAGGCTCA
CCAAGGCAAAGATGGGTAGCGGGTGTGAGAGCATGGCCCGTCTCACTGGGACTGAGACACTGCCCAGACACCTACGGGTG
GCTGCAGTCGAGAATCTTCCGCAATGGACGAAAGTCTGACGGAGCGACGCCGCGTGCGGGATTAAGGCCTTCGGGTTGTA
AACCGCTGTCAGAGGGGAGCAAATTTTGAGCGATCCTCAGAGGAAGCACAGGCTAAGTTCGTGCCAGCCGCCGCCGTAAC
AC
>OTU_63
GATGAACGCTGGCGGCGTGCCTAATACATGCAAGTCGAGCGAATGGATTAAGAGCTTGCTCTTATGAAGTTAGCGGCGGA
CGGGTGAGTAACACGTGGGTAACCTGCCCATAAGACTGGGATAACTCCGGGAAACCGGGGCTAATACCGGATAACATTTT
GAACCGCATGGTTCGAAATTGAAAGGCGGCTTCGGCTGTCACTTATGGATGGACCCGCGTCGCATTAGCTAGTTGGTGAG
GTAACGGCTCACCAAGGCAACGATGCGTAGCCGACCTGAGAGGGTGATCGGCCACACTGGGACTGAGACACGGCCCAGAC
TCCTACGGGAGGCAGCAGTAGGGAATCTTCCGCAATGGACGAAAGTCTGACGGAGCAACGCCGCGTGAGTGATGAAGGCT
TTCGGGTCGTAAAACTCTGTTGTTAGGGAAGAACAAGTGCTAGTTGAATAAGCTGGCACCTTGACGGTACCTAACCAGAA
AGCCACGGCTAACTACGTGCCAGCCGCCGCCGTAACAC
>OTU_64
AACGAACGCTGGCGGCAGGCCTAACACATGCAAGTCGAGCGCACCCTTCGGGGTGAGCGGCGGACGGGTTAGTAACGCGT
GGGAACATACCCTTTTCTACGGAATAGCCTCGGGAAACTGAGAGTAATACCGTATACGCCCTTCGGgggAAAGATTTATC
GGAGAAGGATTGGCCCGCGTTAGATTAGATAGTTGGTGGGGTAACGGCCTACCAAGTCTACGATCTATAGCTGGTTTTAG
AGGATGATCAGCAACACTGGGACTGAGACACGGCCCAGACTCCTACGGGAGGCAGCAGTGGGGAATCTTAGACAATGGGC
GCAAGCCTGATCTAGCCATGCCGCGTgtgtgATGAAGGCCTTAGGGTCGTAAAGCACTTTCGCCAGGGATGATAATGACA
GTACCTGGTAAAGAAACCCCGGCTAACTCCGTGCCAGCCGCCGCCGTAACAC
>OTU_65
AACGAACGCTGGCGGCAGGCTTAACACATGCAAGTCGAGCGCGACCTTCGGGTTGAGCGGCGGACGGGTGAGTAACGCGT
GGGAACATGCCCTTCTCTGCGGAATAGCCTCTGGAAACGGAGAGTAATACCGCATACGCCCTACGGgggAAAGATTTATC
GGAGAAGGATTGGCCCGCGTTGGATTAGGTAGTTGGTGGGGTAACGGCCTACCAAGCCGACGATCCATAGCTGGTTTGAG
AGGATGATCAGCCACACTGGGACTGAGACACGGCCCAGACTTCTACGGAAGGCAGCAGTGGGGAATCTTAGACAATGGgg
gAAACCCTGATCTAGCCATGCCGCGTGAGTGATGAAGGCCCTAGGGTCGTAAAGCTCTTTCGCTGGGGAAGATAATGACG
GTACCCAGTAAAGAAACCCCGGCTAACTCCGTGCCAGCCGCCGCCGTAACAC
>OTU_66
GATGAACGCTAGCGGCAGGCCTAACACATGCAAGTCGAGGGGCAGCGGGGAAAAGCTTGCTTTTCTGCCGGCGACCGGCG
CACGGGTGCGGAACGCGTATGGAACCTGCCCCTGTCAGGGGAATAGCCCAGAGAAATTTGGATTAATGCCCCATGGTATC
CAACCACTGCATGGTgtgtTGGATTAAAGATTTATCGGACAGGGATGGCCATGCGTACCATTAGCTGGTTGGTGGGGTAA
CGGCTTACCAAGGCAACGATGGTTAGGGGCCCTGAGAGGgggATCCcccACACTGGTACTGAGACACGGACCAGACTCCT
ACGGGAGGCAGCAGTGAGGAATATTGGACAATGGGCGGGAGCCTGATCCAGCCATGCCGCGTGCAGGATGACCGCCCTAT
GGGTCGTAAACTGCTTTTGTACGGGAAGAAACCTATCTACGTGTAGATAGCTGACGGTACCGTAAGAATAAGGACCGGCT
AACTCCGTGCCAGCCGCCGCCGTAACAC
>OTU_67
AATGAACGTTGGCGGCGTGGATTAGGCATGCAAGTCGAGCGAGAAATTTATTGTTGAAGCCTCGGTGGATTCAATAAATG
GAAAGCGGCAAACGGCGTAGTAATGCGTAGGTACGTGCCCCTAGATCGGGAATAGCCATGGGAAACCGTGGGTAATGCCC
GATAATGTCTGTGGACCAAAGGTGTGATTCCGTCTAGGGAGCGGCTTACGTGATATTAGCTTGTTGGTGGGGTAATGGCC
TACCAAGGCTACGATGTCTAGGgggTGTGAGAGCATGGCCcccACGACCGGAACTGAGACACTGTCCGGACACCTACGGG
TGGCTGCAGTCGAGAATCTTCCGCAATGGACGAAAGTCTGACGGAGCGACGCCGCGTGCGGGATGAAGGCCCTTGGGTTG
TAAACCGCTGTCAGAGGGGATGAAATCATGGTTGGCTATCCTTCCATGTTGACAGAGCCTCAGAGGAAGCACGGGCTAAG
TACGTGCCAGCCGCCGCCGTAACAC
>OTU_68
ATTGAACGCTGGCGGCATGCTTAACACATGCAAGTCGAACGGCAGCACGAGGAGCTTGCTCCTTGGTGGCGAGTGGCGGA
CGGGTGAGTAACGCGTAGGGATCTGCCCTCTAGCGGgggACAACTCGGGGAAACTCGAGCTAATACCGCATAATCTCGAA
AGAGCAAAGCCTGGGATCTTCGGACCAGGCACTAGAGGATGAACCTGCGTCAGATTAGCTTGTTGGTGGGGTAATGGCCT
ACCAAGGCGATGATCTGTAGCTGGTCTGAGAGGATGATCAGCCACACTGGGACTGAGACACGGCCCAGACTCCTACGGGA
GGCAGCAGTGGGGAATATTGGACAATGGgggAAACCCTGATCCAGCGATGCCGCGTgtgtgAAGAAGGCCTGCGGGTTGT
AAAGCACTTTCAGTTGGGAAGAAGCAATTTACTTTAATAGGGTAATGCGTTGACATTACCAACAGAAGAAGCACCGGCTA
ACTCTGTGCCAGCCGCCGCCGTAACAC
>OTU_69
AACGAACGCTGGCGGCGTGGATTAGGCATGCAAGTCGAGCGGGATCTATCGAAGCTTGCTTTGATAGTGAGAGCGGCGAA
CGGGTGAGGAATACTTGGGTAATTTGCCCTAAAGTCTGGAATAGCTTCGGGAAACTGGAGGTAATGCCGGATGTGATCGA
TCATCATAAGATGATCTGTTTAAAGTGTGGGATCTTCGGACCACACGCTTTAGGATAGGCCCGAGTCCTATCAGCTTGTT
GGTGAGGTAACGGCTCACCAAGGCTAAGACGGGTAGCTGGTCTGAGAGGATGGTCAGCCACACTGGGACTGAGACACTGC
CCAGACTCCTACGGGAGGCTGCAGTCGAGAATCATTCACAATGCACGAAAGTGTGATGATGCGACGCCGCGTGAAGGATG
AAGGCCCTAGGGTCGTAAACTTCTGTCAGAAGGAAAGAACGGTCATTGAGTTAATAGCTCTTTGATTTGACGGTACCTTC
AGAGGAAGCCACGGCTAACTCTGTGCCAGCCGCCGCCGTAACAC
>OTU_70
ATTGAACGCTGGCGGCAGGCTTAACACATGCAAGTCGAGCGGAAACGATGATAGCTTGCTATCAGGCGTCGAGCGGCGGA
CGGGTGAGTAACGCGTAGGAACCTACCCAGTAGTTCGGGATAGCCCAGAGAAATTTGGATTAATACCGGATACGCCCTAC
GGgggAAAGGgggCTTCGGCTCTCGCTATTGGATGGGCCTGCGTGAGATTAGCTAGTTGGTGAGGTAATGGCTCACCAAG
GCGACGATCTCTAGCTGGTTTGAGAGGATGATCAGCCACACTGGGACTGAGACACGGCCCAGACTCCTACGGGAGGCAGC
AGTGGGGAATATTGCACAATGGGCGCAAGCCTGATGCAGCCATGCCGCGTgtgtgAAGAAGGCTCTAGGGTTGTAAAGCA
CTTTCAGCAGTGAGGAAAGGTTAGTAGTTAATACCTGCTAGCTGTGACGTTAACTGCAGAAGAAGCACCGGCTAACTCCG
TGCCAGCCGCCGCCGTAACAC
>OTU_71
GATGAACGCTAGCGGCAGGCCTAACACATGCAAGTCGAACGGTAACATAAAGTGCTTGCACTTTGATGACGAGTGGCGCA
CGGGTGCGTAACGCGTATACAATCTACCTTTTACAGGgggATAGCCTTTAGAAATGAAGATTAATACCCCATAGTATAAT
GAAGTGGCATCGCTTTATTATTAAAGATTCGTCGGTAAAAGATGAGTATGCGTTCTATTAGCTAGATGGTTTGGTAACGG
CAGACCATGGCAACGATAGATAGGGGCCCTGAGAGGgggATCCcccACACTGGTACTGAGACACGGACCAGACTCCTACG
GGAGGCAGCAGTGAGGAATATTGGACAATGGAGGCAACTCTGATCCAGCCATGCCGCGTGCAGGAAGACTGCCCTATGGG
TTGTAAACTGCTTTTATACAGGAAGAAACCACTCTACGTGTAGAGTTCTGACGGTACTGTAAGAATAAGGATCGGCTAAC
TCCGTGCCAGCCGCCGCCGTAACAC
>OTU_72
GATGAACGCTGGCGGCGTGCTTAACACATGCAAGTCGAGCGAGAAGGAAGATATGGAATCTTCGGAGGAAATATCTACTG
GAAAGCGGCGGACGGGTGAGTAACGCGTGGGTAACCTGCCTTGTACAGAGGGATAGCCACTGGAAACGGTGATTAAAACC
TCATAAAACTATATTATCGCATGGTGATATAGTCAAAACTCAGGTGGTACAAGATGGACCCGCGTCTGATTAGCTAGTTG
GTGAGGTAAGGGCTCACCAAGGCGACGATCAGTAGCCGACCTGAGAGGGTGAACGGCCACACTGGAACTGAGAAACGGTC
CAGACTCCTACGGGAGGCAGCAGTGGGGAATATTGCACAATGGGCGAAAGCCTGATGCAGCAACGCCGCGTGAGCGAAGA
AGGCTTTCGGGTCGTAAAGCTCTGTCCTATGGGAAGAAGAAGTGACGGTACCATAGGAGGAAGCCCCGGCTAACTACGTG
CCAGCCGCCGCCGTAACAC
>OTU_73
ATTGAACGCTGGCGGCAGGCCTAACACATGCAAGTCGAGCGGTAACATTTCTAGCTTGCTAGAAGATGACGAGCGGCGGA
CGGGTGAGTAATGCTTGGGAACATGCCTTGAGGTGGgggACAACAGTTGGAAACGACTGCTAATACCGCATAATGTCTAC
GGACCAAAGGgggCTTCGGCTCTCGCCTTTAGATTGGCCCAAGTGGGATTAGCTAGTTGGTGAGGTAATGGCTCACCAAG
GCGACGATCCCTAGCTGGTTTGAGAGGATGATCAGCCACACTGGGACTGAGACACGGCCCAGACTCCTACGGGAGGCAGC
AGTGGGGAATATTGCACAATGGGCGCAAGCCTGATGCAGCCATGCCGCGTgtgtgAAGAAGGCCTTCGGGTTGTAAAGCA
CTTTCAGTCAGGAGGAAAGGGATGTAGTTAATACCTGCATCCTGTGACGTTACTGACAGAAGAAGCACCGGCTAACTCCG
TGCCAGCCGCCGCCGTAACAC
>OTU_74
GATGAACGCTAGCGGCAGGCCTAACACATGCAAGTCGAGGGGTAACAGGAAaaaGCTTGCTTtttCGCTGACGACCGGCG
CACGGGTGCGTAACGCGTATACAATCTGCCTTATACTGGgggATAGCCTTTAGAAATGAAGATTAACACCCCATAGTCTA
TAGAAGTGGCATCACTATTATAGTAAAGGATACGGTATAAGATGAGTATGCGTCCTATTAGTTAGTTGGTAAGGTAACGG
CTTACCAAGACGACGATAGGTAGGGGCCCTGAGAGGgggATCCcccACACTGGTACTGAGACACGGACCAGACTCCTACG
GGAGGCAGCAGTGAGGAATATTGGACAATGGAGGCAACTCTGATCCAGCCATGCCGCGTGCAGGAAGACTGCCCTATGGG
TTGTAAACTGCTTTTATACAGGAAGAAACCTTTCCACGTGTGGAAAGCTGACGGTACTGTAAGAATAAGGACCGGCTAAC
TCCGTGCCAGCCGCCGCCGTAACAC
>OTU_75
AACGAACGCTGGCGGCATGCCTAACACATGCAAGTCGAACGAACCCTTCGGGGTTAGTGGCGCACGGGTGCGTAACGCGT
GGGAACCTGCCTTTAGGTTCGGAATAACTCAGAGAAATTTGAGCTAATACCGGATAATGTCTTCGGACCAAAGATTTATC
GCCTTTAGATGGGCCCGCGTTAGATTAGATAGTTGGTGGGGTAACGGCCTACCAAGTCGACGATCTATAGCTGGTCTGAG
AGGATGATCAGCCACACTGGGACTGAGACACGGCCCAGACTCCTACGGGAGGCAGCAGTGGGGAATATTGGACAATGCGG
GAAACCGTGATCCAGCAATGCCGCGTGAGTGATGAAGGCCTTAGGGTTGTAAAGCTCTTTTACCAGGGATGATAATGACA
GTACCTGGAGAATAAGCTCCGGCTAACTCCGTGCCAGCCGCCGCCGTAACAC
>OTU_76
AGCGAACGCTGGCGGTATGCTTTACACATGCAAGTCGAGCGCGAAAGTGACTTCGGTCACGAGTAGAGCGGCGGACGGGT
GCGTAACACGTGGATAATCTGCCTTTAGGACTGGGATAACTCAGGGAAACTTGGGCTAATACCGGATAAGACCACAGCTT
CCATGGAAGCAGAGGTAAAAGGCGGCCTTCGGGCTTTCACCTAAAGATGAGTCCGCGCACCATCAGGTTGTTGGTGAGGT
AATGGCTCACCAAGCCTAAGACGGTTAGCCGACCTTAGCGGGTGATCGGCCACACGGGGACTGAGACACGGCCCCGACTC
CTACGGGAGGCAGCAGTGGGGAATATTGGACAATGGGCGAAAGCCTGATCCAGCAATACCGCGTGAGGGATGAAGGTCTT
CGGGTCGTAAACCTCTGTCAGTTGGAACGATGGGTTCTGTAGGTAATATTTACAGAACTTGACGGTACCTTCAAAGGAAG
CCCCGGCTAACTCCGTGCCAGCCGCCGCCGTAACAC
>OTU_77
GATGAACGCTGGCGGCGTGCTTAACACATGCAAGTCGAACGAATCCTTCGGGATGAGTGGCGGACGGGTGAGTAACGCGT
GAGCATCTGCCCAAAGGTGGgggACAACCATTGGAAACGATGGCTAATACCCCATATGCCGAGAGGTGAAAGGTTTACTG
CCTTTGGATGAGCTCGCGTCTGATTAGCTAGATGGTGGGGTAACGGCTTACCATGGCGACGATCAGTAGCTGGTCTGAGA
GGATGATCAGCCACACTGGGACTGAGACACGGCCCAGACTCCTACGGGAGGCAGCAGTGGGGAATTTTCCGCAATGGGCG
AAAGCCTGACGGAGCAACGCCGCGTGAGGGAGGAATGTCTTTGGATTGTAAACCTCTTTTCTCAAGGAAGATAATGACGG
TACTTGAGGAATCAGCATCGGCTAACTCCGTGCCAGCCGCCGCCGTAACAC
>OTU_78
AATGAACGTTGGCGGCGTGGATTAGGCATGCAAGTCGAGCGAGAAGCTTttttttGATCTTTCGAGTGAAGAAaaaaGTG
GACAGCGGCGAAAGGGAGAGTAACACGTAAATTACGTACCCAGGGGTGCGGAATAGCGGggggAAACCGCCGGTAATGCC
GCATAATGTCTCCGGACCAAAGATTTATCGCCCTTGGAGCGGTTTGCGTACTATTAGCTTGTTGGTGGGGTAATGGCCTA
CCAAGGCTTTGATGGTTAGCGGGCGTGAGAGCGTGGCCCGTCTCACTGGGACTGAGACACTGCCCAGACACCTACGGGTG
GCTGCAGTCGAGAATCTTCGGCAATGGACGAAAGTCTGACCGAGCGACGCCGCGTGCGGGATGAAGGCCTTCGGGTTGTA
AACCGCTGTCAGAGGGGAGCAAATTTTGAGCGATCCTCAGAGGAAGCACAGGCTAAGTTCGTGCCAGCCGCCGCCGTAAC
AC
>OTU_79
GACGAACGCTGGCGGCGTGCCTAATACATGCAAGTCGAACGAGATCCCGGAGCTTGCTCCGGgggACAGTGGCGAACGGG
TGAGTAACACGTGAGAAACCTGCCCTAGAGACCGGGACAACCGTTGGAAACGGCGGCTAATACCGGATGCCTTCACATGG
TCGCATGGCCGAGTGAAGAAATGCTCAGGTGCTCTAGGAGGGTCTCGCGGCCTATCAGCTAGTTGGTGAGGTAACGGCTC
ACCAAGGCATCGACGGGTAGCTGGTCTGAGAGGACGATCAGCCACACTGGGACTGAGACACGGCCCAGACTCCTACGGGA
GGCAGCAGTAGGGAATCTTGCGCAATGGgggAAACCCTGACGCAGCAACGCCGCGTGTGGGATGACGGCTTTCGGGTTGT
AAACCACTTTCAGTGATGACGAAAATGACGGTAATCACAGAAGAAGGTCCGGCCAACTACGTGCCAGCCGCCGCCGTAAC
AC
>OTU_80
AATGAACGTTGGCGGCATGGATTAGGCATGCAAGTCGAGCGAGAAGCTTCCTTCGGGAAGTGGACAGCGGCGAAAGGGAG
AGTAACGCGTAGATTATCTACCCTCAGGTCTGGGATAGCCACCGGAAACGGTGATTAATACCAGATAATGTCTCAGGACC
AAAGTTtttCGCCTGAGGAGGAGTCTGCGTCCTACTAGCTAGTTGGTGTGGTAAAGGCGCACCAAGGCTACGATGGGTAG
CGGGCGTGAGAGCGTGGCCCGTCTCACTGGGACTGAGATACTGCCCAGACATCTACGGATGGCTGCAGTCGAGAATCTTC
GGCAATGGACGAAAGTCTGACCGAGCAATGCCGCGTGCGGGATGAAGGCCCTCGGGTTGTAAACCGCTGTCAGAGGGAAG
GAAATTTTGACTGAACCTCAGAGGAAGCACAGGCTAAGTTCGTGCCAGCCGCCGCCGTAACAC
>OTU_81
GATGAACGCTAGCGGCAGGCTTAACACATGCAAGTCGAGGGGCAGCATGATACTTCGGTATTGATGGCGACCGGCGCACG
GGTGCGTAACGCGTATAGAACCTACCCATGACAGGgggATAGCCCAGAGAAATTTGGATTAATACCCCATGGTGTATTAG
TGAGGCATCTCATTtttATTAAAGATTTATCGGTTGTGGATGGCTATGCGTTCTATTAGTTTGTTGGTGGGGTAACGGCT
CACCAAGGCTTCGATAGATAGGGGTTCTGAGAGGAATATCCcccACACTGGTACTGAGACACGGACCAGACTCCTACGGG
AGGCAGCAGTGAGGAATATTGGACAATGGGCGCAAGCCTGATCCAGCCATGCCGCGTGCAGGAAGAAAGCCCTATGGGTT
GTAAACTGCTTTTATTCACGAGGAATAGATTTCTTGCGAGGAATTTTGACGTTAGTGTTTGAATAAGCACCGGCTAACTC
CGTGCCAGCCGCCGCCGTAACAC
>OTU_82
GACGAACGCTGGCGGCGTGCTTAATACATGCAAGTCGAACGAGAAAGCTCCTTCGGGAGTGAGTAGAGTGGCGAACGGGT
GAGTAACGCGTAGGTGATCTACCCTTGAGATTGAGATAACTTCTGGAAACGGGAGCTAATACCGAATGACGCAATCATAT
TGGTTTATGATTGTTAAAGTGGCTTTCGGGTCACACTTAAGGATGAGCCTGCGTCCTATCAGCTAGTTGGTTAGGTAACG
GCTAACCAAGGCGAAGACGGGTAGCTGGTCTGAGAGGATGATCAGCCACACTGGGACTGAGACACGGCCCAGACTCCTAC
GGGAGGCAGCAGTAGGGAATATTGCGCAATGGAGGAAACTCTGACGCAGCGACGCCGCGTGAGTGAAGAAGGCCTTTCTG
GTTGTAAAGCTCTGTAAGGAGGGAAGAACCGCATCTGGTAACGCAGATGCCTGACGGTACCTCCAAAGTAAGGACCGGCT
AAATACGTGCCAGCCGCCGCCGTAACAC
>OTU_83
GATGAACGCTAGCGGCAGGCCTAACACATGCAAGTCGAACGGTAACATTCTCGCTTGCGAgagaTGACGAGTGGCGCACG
GGTGCGTAACGCGTATGCAACCTACCTCTATCAGGgggATAGCCCGGAGAAATCCGGATTAATACCCCATAGTATTACTG
ATTGGCATCTATTAGTAATTAAAGCTTCGGCGGATAGAGATGGGCATGCGTCCTATTAGTTAGTTGGTAAGGTAACGGCT
TACCAAGACTACGATAGGTAGGgggCCTGAGAGGGTGATCCcccACACTGGTACTGAGACACGGACCAGACTCCTACGGG
AGGCAGCAGTGAGGAATATTGGGCAATGGACGAAAGTCTGACCCAGCCATGCCGCGTGCAGGATGACTGCCCTATGGGTT
GTAAACTGCTTTTATACAGGAATAAACCcccGGACGTGTCCGGGGCTGAAGGTACTGTAAGAATAAGGATCGGCTAACTC
CGTGCCAGCCGCCGCCGTAACAC
>OTU_84
ATTGAACGCTAGCGGCATGCTTAACACATGCAAGTCGAGCGGAAACGATGGAAGCTTGCTTCCAGGCGTCGAGCGGCGGA
CGGGTGAGTAACGCGTAGGAATCTACCTTATAGTGGgggATAACCCGGGGAAACTCGGGCTAATACCGCATAATCTCTAA
GGAGCAAAGCGGgggATCTTCGGACCTCGTGCTAAAAGATGAGCCTGCGTTGGATTAGCTTGTTGGTGGGGTAAAGGCCT
ACCAAGGCGACGATCCATAGCTGGTCTGAGAGGACGATCAGCCACACTGGGACTGAGACACGGCCCAGACTCCTACGGGA
GGCAGCAGTGGGGAATATTGGACAATGGgggCAACCCTGATCCAGCAATGCCGCGTgtgtgAAGAAGGCCTTCGGGTTGT
AAAGCACTTTCAGTGGGGAAGAAAGGCCCAAGATTAATACTCTTGGGAGTTGACGTTACCCACAGAAGAAGCACTGGCTA
ACTCTGTGCCAGCCGCCGCCGTAACAC
>OTU_85
AACGAACGCTGGTGGCATGCCTAATACATGCAAGTCGAACGATAAAGCTCTTCGGAGTGATTAAAGTGGCGCACGGGTGA
GTAACGCGTAGGTGACATGCCTTtttGTGGggggCAACATCGGGAAACCGGTGCTAATACCGCATAAGTTTGGTGACATT
GAAaaaGCCAAAGAAAGGgggCTTCGGCTCTCGCAAGAAGATTGGCCTGCGTATCATTAGCTTGTTGGTGGGGTAAAGGC
TTACCAAGGCGACGATGATTAACTGGTCTGAGAGGATGATCAGTCACACTGGAACTGAGACACGGTCCAGACTCCTACGG
GAGGCAGCAGTAGGGAATATTGCGCAATGGAGGAAACTCTGACGCAGCAATGCCACGTGAGTGAGGAAGGTTTTCGGATT
GTAAAGCTCTGTCCTATAGGAAGAATGGCATTATGGTTAATACCCGTAGTGTTTGACGGTACTATAGAAGAAAGCACCGG
CTAACTCCGTGCCAGCCGCCGCCGTAACAC
>OTU_86
GACGAACGCTGGCGGCGTGCCTAATACATGCAAGTCGAACGCCCTCGACCTTCGGGTCACATGAGGGAGTGGCGAACGGG
TGCGTAACACGTGAGAAACCTGCCCTAGAGACGGGAATAACTCGAGGAAACTCGTGCTAATGCCCGATGCCCTCTTTGGA
CCGCATGGTCCGCTGAGGAAAGGCTCCGGCGCTCTAGGAGGGTCTCGCGGCCTATCAGCTTGTTGGTGAGGTAACGGCTC
ACCAAGGCATCGACGGGTAGCTGGTCTGAGAGGACGATCAGCCACACTGGGACTGAGACACGGCCCAGACTCCTACGGGA
GGCAGCAGTAGGGAATCTTGCGCAATGGGCGAAAGCCTGACGCAGCAACGCCGCGTGGgggATGAAGGCCTTCGGGTCGT
AAACCCCTTTCAGCAGGGACGAAAATGACGGTACCTGCAGAAGAAGGTCCGGCCAACTACGTGCCAGCCGCCGCCGTAAC
AC
>OTU_87
AACGAACGCTGGCGGCAGGCTTAACACATGCAAGTCGAGCGAAGACTTCGGTCTTAGCGGCGGACGGGTGAGTAACGCGT
GGGAACGTGCCCTTTACTTCGGAATAGCCTCTGGAAACGGAGAGTAATACCGAATGTGCCCTTAGGgggAAAGATTTATC
GGTAAAGGATCGGCCCGCGTTAGATTAGGTAGTTGGTGGGGTAATGGCCTACCAAGCCTACGATCTATAGCTGGTTTGAG
AGGATGATCAGCCACACTGGGACTGAGACACGGCCCAGACTCCTACGGGAGGCAGCAGTGGGGAATCTTGGACAATGGgg
gCAACCCTGATCCAGCCATGCCGCGTGAGTGATGAAGGCCTTAGGGTCGTAAAGCTCTTTCGCCAGGGATGATAATGACA
GTACCTGGTAAAGAAACCCCGGCTAACTCCGTGCCAGCCGCCGCCGTAACAC
>OTU_88
AATGAACGTTGGCGGCGTGGATTAGGCATGCAAGTCGAACGAGAAGCTTTAAaaaGATACCTCGGTTGATTtttAAGGTG
GACAGTGGCGAAAGGGAGAGTAACGAGTAGATCACGTACCCAGGGGTTCGGGATAGCTGCGGGAAACTGCAGGTAATACC
GAATAACGTCTCCGGACCAAAGATTTATTGCCCTTGGAGCGGTCTGCTTACTATTAGCTTGTTGGTGGGGTAAAGGCTTA
CCAAGGCTAAGATGGTTAGCGGGTGTGAGAGCATGGCCCGTCTCACTGGGACTGAGACACTGCCCAGACACCTACGGGTG
GCTGCAGTCGAGAATCTTCCGCAATGGACGAAAGTCTGACGGAGCGACGCCGCGTGCGGGATGAAGGCCCTCGGGTTGTA
AACCGCTGTCATAGGGGAGGAAATTTTGACCGATCCTAAGAGGAAGCACAGGCTAAGTTCGTGCCAGCCGCCGCCGTAAC
AC
>OTU_89
GATGAACGCTAGCGGCAGGCCTAACACATGCAAGTCGAGGGGTAACAGAGTTTGCTTGCAAACTGCTGACGACCGGCGCA
CGGGTGCGGAACGCGTATGGAACCTGCCCCTGTCAGGGGAATAGCCCAGAGAAATTTGGATTAATGCCCCATGGTATCCA
ACCACTGCATGGTgtgtTGGATTAAAGATTTATCGGACAGGGATGGCCATGCGTACCATTAGCTGGTTGGTAAGGTAACG
GCTTACCAAGGCAACGATGGTTAGGGGCCCTGAGAGGgggATCCcccACACTGGTACTGAGACACGGACCAGACTCCTAC
GGGAGGCAGCAGTGAGGAATATTGGACAATGGGCGGGAGCCTGATCCAGCCATGCCGCGTGCAGGATGACCGCCCTATGG
GTCGTAAACTGCTTTTGTACGGGAAGAAACCTATCTACGCGTAGATAGCTGACGGTACCGTAAGAATAAGGACCGGCTAA
CTCCGTGCCAGCCGCCGCCGTAACAC
>OTU_90
AATGAACGCTGGCGGCGTGGATAAGACATGCAAGTCGAACGAGAAACTGATTAGCTTGCTTTGAAGTTTCTAGTGGCGGA
CGGGTTAGTAACACGTGAGCAACCTGCCTCGAAGCGGgggATAGCCTTCCGAAAGGGAGATTAATACCGCATGTGACCTT
CGGGTTAAAGACGCCTTTGGTGTCACTTCGAGATGGGCTCGCGGCCTATCAGCTTGTTGGTAAGGTAACGGCTTACCAAG
GCGACGACGGGTAGCTGGTCTGAGAGGACGATCAGCAACACTGGAACTGAGACACGGTCCAGACACCTACGGGTGGCAGC
AGTCGAGAATCATTCACAATGGACGAAAGTCTGATGGTGCAACGCCGCGTGGAGGATGAAGGCCCTAGGGTCGTAAACTC
CTGTCATATGAGAGTAAGGCATGTTAGGTTAAGAGCTAAACATGTTTGATAGTATCATAAGAGGAAGGGACGGCTAACTT
CGTGCCAGCCGCCGCCGTAACAC
>OTU_91
ATTGAACGCTGGCGGCAGGCCTAACACATGCAAGTCGAGCGGAAACGAGTTATCTGAACCTTCGGGGAACGATAACGGCG
TCGAGCGGCGGACGGGTGAGTAATGCCTAGGAAATTGCCCTGATGTGGgggATAACCATTGGAAACGATGGCTAATACCG
CATAATGCCTACGGGCCAAAGAGGgggACCTTCGGGCCTCTCGCGTCAGGATATGCCTAGGTGGGATTAGCTAGTTGGTG
AGGTAATGGCTCACCAAGGCGACGATCCCTAGCTGGTCTGAGAGGATGATCAGCCACACTGGAACTGAGACACGGTCCAG
ACTCCTACGGGAGGCAGCAGTGGGGAATATTGCACAATGGGCGCAAGCCTGATGCAGCCATGCCGCGTgtgtgAAGAAGG
CCTTCGGGTTGTAAAGCACTTTCAGTCGTGAGGAAGGTAGTGTAGTTAATAGCTGCATTATTTGACGTTAGCGACAGAAG
AAGCACCGGCTAACTCCGTGCCAGCCGCCGCCGTAACAC
>OTU_92
AATGAACGTTGGCGGCGTGGATTAGGCATGCAAGTCGAGCGGTAAGGCCCTTCGGGGTACACGAGCGGCAAACGGGGTAG
TCATACGTGGGAACGTACCCTCCGGACCGGGATAGCCATTGGAAACGATGGGTAATACCGGATAATCtctctGGAGCAAA
TGTTtttCGCCGGAGGAGCGGCCCACGCGATACTAGGTAGATGGTGAGGTAACGGCTCACCATGCCGATGATGTCCAGGg
ggTGTGAGAGCATGGCCcccACCACCGGAACTGAGACACTGTCCGGACACCTACGGGTGGCTGCAGTCGAGAATCTTCCA
CAATGGGCGAAAGCCTGATGGAGCGACGCCGCGTGCGGGATGACGGCCCTCGGGTTGTAAACCGCTGTCAGGggggAGCA
AAGCTTCGGTTTGAGCGAGCCCCAGAGGAAGCACGGGCTAAGTACGTGCCAGCCGCCGCCGTAACAC
>OTU_93
AATGAACGTTGGCGGCGTGGATTAGGCATGCAAGTCGAGCGAGAAACTTTAGCTTGCTAGAGTGGACAGCGGCGAAAGGG
AGAGTAATGCGTAGGAATCTGCCCTGGGGTCTGGGATAGCGTCGGGAAACTGGCGGTAATACCGGATAACGTCTTCGGAC
CAAAGAATTTCGCCCTGGGATGAGCCTACGTCCTATTAGCTAGTTGGTGGGGTAATTGCCTACCAAGGCGACGATGGGTA
GCGGGTGTGAGAGCATGATCCGCCTCACTGGGACTGAGACACTGCCCAGACATCTACGGATGGCTGCAGTCGAGAATCTT
TGTCAATGGACGAAAGTCTGAACAAGCGACGCCGCGTGCGGGATGAAGGCCTTCGGGTTGTAAACCGCTGTCAGAGGGGA
GGAAATTTTGACTGAACCTCAGAGGAAGGACGGGCTAAGTTCGTGCCAGCCGCCGCCGTAACAC
>OTU_94
GATGAACGCTAGCGGGAGGCTTAATACATGCAAGTCGAGGGGTAACATGAGAGCTTGCTCTTGATGACGACCGGCGCACG
GGTGAGTAACGCGTACACAATCTGCCCTAAAGAGGAGAATAGCCCTGGGAAACTGGGATTAATGCTCCATAGTATCTTAA
TACCGCATGGTATAAAGATTAAAGTTCCGATGCTTTAGGATGAGTGTGCGTCCCATTAGCTAGTTGGTAAGGTAACGGCT
TACCAAGGCGACGATGGGTAGGgggCGTGAGAGCGTGATCCcccACACGGGTACTGAGACACGGACCCGACTCCTACGGG
AGGCAGCAGTAAGGAATATTGGACAATGCCCGAAAGGGTGATCCAGCCATCCCGCGTGCAGGAAGAATGCCCTATGGGTT
GTAAACTGCTTTTAtataCCAAGAAACCCCGGGATTCATCCCGGGCTGACGGTAGTATATGAATAAGCACCGGCTAACTC
CGTGCCAGCCGCCGCCGTAACAC
>OTU_95
GACGAACGCTGGCGGCGTGCTTAATACATGCAAGTCGAACGAGAAAGCTCCTTCGGGAGTTAGTAGAGTGGCGAACGGGT
GAGTAACGCGTAGGTGATCTACCCTTGAGATCGAGATAACTCCTGGAAACGGgggCTAATACCGGATGACGCAGTCCAAT
TGGCTTAGGACTGTTAAAGTGGCTTTATTGTCACACTTGAGGATGAGCCTGCGTCCTATCAGCTAGTTGGTTAGGTAACG
GCTAACCAAGGCAAAGACGGGTAGCTGGTCTGAGAGGATGATCAGCCACACTGGGACTGAGACACGGCCCAGACTCCTAC
GGGAGGCAGCAGTAGGGAATATTGCGCAATGGgggAAACCCTGACGCAGCGACGCCGCGTGAGTGAAGAAGGCCTTTCTG
GTTGTAAAGCTCTGTAAGGAGGGAAGAACCACATCTGGTAACGCAGATGTCTGACGGTACCTCCAAAGTAAGGACCGGCT
AAATACGTGCCAGCCGCCGCCGTAACAC
>OTU_96
GATGAACGCTAGCGGCAGGCTTAACACATGCAAGTCGAGGGGTAACGATGTCTTCGGACAGGCGACGACCGGCGCACGGG
TGCGTAACGCGTATGCAACCTACCTTTAACTGGAGGATAGCCCCGAGAAATCGGGATTAATACTCCATAGTAATGAGATT
CGGCATCGTTtttCATTTAAAGCTCCGGCGGTTAGAGATGGGCATGCGTGACATTAGTTTGTTGGTGAGGTAACGGCTCA
CCAAGACTACGATGTCTAGGGGTTCTGAGAGGATGATCCcccACACTGGTACTGAGACACGGACCAGACTCCTACGGGAG
GCAGCAGTGAGGAATATTGGTCAATGGACGCAAGTCTGAACCAGCCATGCCGCGTGAAGGATGACGGCCCTATGGGTTGT
AAACTTCTTTTATTAAGGAATAAACCcccTTACGTGTAAGGGGCTGAACGTACTTAAAGAATAAGCATCGGCTAACTCCG
TGCCAGCCGCCGCCGTAACAC
>OTU_97
GACGAACGCTGGCGGCGTGCCTAACACATGCAAGTCAAAGGAAAACAGCTTCGGCTGCAAGTACTTGGCGCAAGGGTGAG
TAAGGTATAGGTAATTTGCCTACAGGACCGGGATAACCCCGAGAAATCGGGGACAATACCGGATGATGCAGCGGAACCGC
ATGGTTATGTTGTTAAACGAGGAATCGCCTGTAGATAAGCCTATATTCCATCAGGTAGTTGGCGGGGTAAAAGCCCACCA
AGCCTACGACGGATAGCTGGTCTGAGAGGATGATCAGCCACATTGGAACTGAGACACGGTCCAGACTCCTACGGGAGGCA
GCAGTGAGGAATATTGCGCAATGGGCGAAAGCCTGACGCAGCAACGCCGCGTGGATGAAGAAGTTCCTCGGAATGTAAAG
TCCTTTTGCAGAAGAAGAACCTCCCGGCTTGCCGGGACTGACGGTACTCTGCGAATAAGCCACGGCTAACTCTGTGCCAG
CCGCCGCCGTAACAC
>OTU_98
ATTGAACGCTGGCGGCATGCTTAACACATGCAAGTCGAACGGCAGCACGAgagagCTTGCTctctTGGTGGCGAGTGGCG
AACGGGTGCGTAACGCGTGGGAATCTACCCTAAGGCGGgggACAACTCGGGGAAACTCGAGCTAATACCGCATATGACTG
AGAAGTTAAAGATGGCCTCTACTTGTAAGCTATCACCTTGGGATGAGCCTGCGTCCGATTAGCTAGTTGGTGGGGTAAAA
GCCTACCAAGGCGACGATCGGTAGCTGTTCTGAGAGGAAGATCAGCCACACTGGGACTGAGACACGGCCCAGACTCCTAC
GGGAGGCAGCAGTGGGGAATATTGGGCAATGGgggCAACCCTGACCCAGCAATGCCGCGTgtgtgAAGAAGGCCTGAGGG
TTGTAAAGCACTTTGATTGGGGAGGAAGGCGTTAAGGTTAATACCCTTGACGATTGACGTTACCCAAAGAACAAGCACCG
GCTAACTCTGTGCCAGCCGCCGCCGTAACAC
>OTU_99
GGTGAACGCTAGCGGTGCGCCTAACACATGCAAGTCGAGCGGTAGAATTTTCTAGCTTGCTAGAAAATTTGAGAGCGGCG
AACGGGTGAGTAACACGTTGGAATCTGCCcccAAGTCAGGGATAGCCATTGGAAACGATGATTAATACCGGATGTGCTCT
TCGGAGTAAAGATTTATCGCTTGGGGAGGATCCTGCGTACTATCAGCTTGTTGGTGAGGTAACTGCTCACCAAGGCTATG
ACGGTTAACTGGTCTGAGAGGATGATCAGTCACAATGAAACTGAGACACGGTTCATACTCCTACGGGAGGCAGCAGTGAG
GAATCTTCCACAATGGACGAAAGTCTGATGGAGCGACACCGCGTGAAGGATGACGGTCTAACGATTGTAAACTTCTTTTC
TGAGGGAGCATAATGAGAGTACCTCAGGAATAAGGGACGGCTAATTACGTGCCAGCCGCCGCCGTAACAC
>OTU_100
GATGAACGCTAGCGGCAGGCCTAACACATGCAAGTCGAACGGTAACATTGGTTGCTTGCAACCAGATGACGAGTGGCGCA
CGGGTGCGGAACGCGTATCGAACCTGCCcccTTCAGGAGGATAGCCCATGGAAACGTGGATTAATACTCCATAGTACCTA
ACCGTTGCATGACGGGTAGGTTAAAGATTTATCGGAAGGGGATGGCGATGCGTACCATTAGCTAGTTGGTAAGGTAACGG
CTTACCAAGGCAACGATGGTTAGGGGCCCTGAGAGGgggATCCcccACACTGGTACTGAGACACGGACCAGACTCCTACG
GGAGGCAGCAGTGAGGAATATTGGACAATGGTGGGAACACTGATCCAGCCATGCCGCGTGCAGGATGACTGCCCTATGGG
TTGTAAACTGCTTTTATACGGGAAGAAACCCGGGTACGTGTACCCGGCTGACGGTACCGTAAGAATAAGGACCGGCTAAC
TCCGTGCCAGCCGCCGCCGTAACAC
>OTU_101
AACGAACGCTGGCGGCAGGCTTAACACATGCAAGTCGAACGATCCTTCGGGATAGTGGCAGACGGGTGAGTAACGCGTGG
GAACCTTCCCTATGGTACGGAATAGCTCCGGGAAACTGGAATTAATACCGTATAAGCCCTTCGGgggAAAGATTTATCGC
CATAGGATGGGCCCGCGTCGGATTAGCTAGTTGGTGAGGTAATGGCTCACCAAGGCTACGATCCGTAGCTGGTCTTAGAG
GATGATCAGCCACACTGGGACTGAGACACGGCCCAGACTCCTACGGGAGGCAGCAGTGGGGAATATTGGACAATGGGCGC
AAGCCTGATCCAGCCATGCCGCGTGAGTGACGAAGGCCTTAGGGTTGTAAAACTCTTTTGGCGGGGACGATAATGACGGT
ACCCGCAGAATAAGCCCCGGCTAACTTCGTGCCAGCCGCCGCCGTAACAC
>OTU_102
AATGAACGTTGGCGGCGTGGATTAGGCATGCAAGTCGAGCGAGAAGTTCATGAATGATCCTTCGGGTGAATGATTGAATG
GACAGCGGCGAACGGCGTAGTAATGGATAGGTTACGTGCCCTCAGGACGGGAATAGCCACGGGAAACTGTGGGTAATGCC
CGATAATATCTCAGGATCAAATGGTGTGATTCCGCCTGAGGAGCGGCTTATTTGGTATTAACTAGTTGGTGGGGTAATGG
CCTACCAAGGTTTTGATGCTTAGGgggTGTGAGAGCATGGCCcccACGACCGGGACTGAGACACTGCCCGGACATCTACG
GATGGCTGCAGTCGAGAATCTTCCGCAATGGACGCAAGTCCGACGGAGCGACGCCGCGTGGTGGATGAAGGCCCTTGGGT
TGTAAACACCTGTCAGAGGGGATGAAATGGTTGGAGGCTATCCTCCTTCCTTGACAGAGCCTCAGAGGAAGCACGGGCTA
AGTACGTGCCAGCCGCCGCCGTAACAC
>OTU_103
AGCGAACGGTGGCGGCGTGGATTAGGCATGCAAGTCGGACGCGAACGGAAAGCTTGCTTTCCAAGTAGAGTGGCGAACGG
GTGAGTAATGTATGGATGACCTACCTCGGACTCTGGGACAACCACTGGAAACGGTGGCTAATACCGGATGGTCCTGCTGA
TTCATTTTGGCAGGTAAAGATACTTGTATCGGTCTGTGAGGGATCCATATCCCATCAGCTTGTTGGCGGGGTAATGGCCC
ACCAAGGCGACGACGGGTAGCCGGACTGAGAGGTCGACCGGCCACATCGGGACTGAGACACTGCCCGGACTCCTACGGGA
GGCTGCAGTCGAGAATCTTCCGCAATGGGCGCAAGCCTGACGGAGCGACGCCGCGTGAAGGATGACGGCCCTCGGGTTGT
AAACTTCTGTCAGTCGAGAAGAACGTCCAAGGTGACCCCTGGGACTGACGTTATCGACAGAGGAAGCCACGGCTAACTTC
GTGCCAGCCGCCGCCGTAACAC
>OTU_104
GATGAACGCTAGCGGCAGGCTTAATACATGCAAGTCGTGGGGCAGCATGAATGTAGCAATACATTTGATGGCGACCGGCA
AACGGGTGCGGAACACGTACACAACCTTCCTATAAGTGGGGAATAGCCCAGAGAAATTTGGATTAATACCCCGTAACATA
ATGATGTGGCATCACATTATTATTATAGCTTCGGCGCTTATTGATGGGTGTGCGGCTGATTAGATAGTTGGCGGGGTAAC
GGCCCACCAAGTCTACGATCAGTAGCTGATGTGAGAGCATGATCAGCCACACGGGCACTGAGACACGGGCCCGACTCCTA
CGGGAGGCAGCAGTAAGGAATATTGGTCAATGGACGCAAGTCTGAACCAGCCATGCCGCGTGAAGGATTAAGGTCCTCTG
GATTGTAAACTTCTTTTATCTGGGACGAAaaaaGGCGATTCTTCGTCACTTGACGGTACCAGATGAATAAGCACCGGCTA
ACTCCGTGCCAGCCGCCGCCGTAACAC
>OTU_105
AACGAACGCTGGCGGCAGGCTTAACACATGCAAGTCGAACGAACCTTTTAGGTGAGTGGCGCACGGGTGCGTAACGCGTG
GGAATATGCCCTTGAGTGAGGAATAACGTAGAGAAATTTGCGCTAATACCTCATAATGACTCCGGTCCAAAGATTTATCG
CTCAAGGATTAGCCCGCGTCAGATTAGATAGTTGGTGAGGTAACGGCTCACCAAGTCGACGATCTGTAGGgggTCTGAGA
GGATGATCCcccACACTGGTACTGAGACACGGACCAGACTCCTACGGGAGGCAGCAGTGAGGAATATTGGACAATGGAGG
AAACTCTGATCCAGCCATGCCGCGTGAGTGAAGAAGGCCTTAGGGTTGTAAAGCTCTTTCAATTGCGAAGATAATGACGG
TAACAATAGAAGAAGCTCCGGCTAAATTCGTGCCAGCCGCCGCCGTAACAC
>OTU_106
AACGAACGCTGGCGGCGTGCTTAACACATGCAAGTCGAACGAGAAAGCCCTTCGGGGTGAGTAGAGTGGCGCACGGGTGA
GTAATGCATGGGAACATACCTTCAGGAGGgggATAACAGTTGGAAACGACTGCTAATACCGCATAGTCTCTTCGGAGTAA
ACGAGGCCTATACTTGTAAGCTACGGCCTGAAGATTGGCCCATGTCGCATTAGCTTGTTGGTGAGGTAAAGGCTCACCAA
GGCGACGATGCGTAGCTGGTCTGAGAGGATGATCAGCCACACTGGAACTGAGACACGGTCCAGACTCCTACGGGAGGCAG
CAGTGGGGAATATTGCACAATGGGCGCAAGCCTGATGCAGCAACGCCGCGTGGGTGAAGAAGGCTCTTGGGTCGTAAAGC
CCTTTCGGCAGAGAAGAAGGGTGTTCTTTCGAATAGGGAGATCATTTGACGGTATCTGCATAAGAAGCACCGGCTAATTT
CGTGCCAGCCGCCGCCGTAACAC
>OTU_107
AACGAACGCTGGCGGCGCGTTTTAAGCATGCAAGTCGAATGGGAAGCAGTCTTCGGATTGTGGAACATGGCGGACGGGTG
AGTAACACGTAGATAATCTGCCCTTGAGTTGGGGATACCCCATGGAAACATGGAATAATACCGAATAAAATCTTTTAAAC
GTAGGTTTAGAAGATGAAAGGAGCTTCGGCTTCGCTTGAGGATGAGTCTGCGGCTCATTAGCTAGTTGGTGGGGTAACGG
CCTACCAAGGCGATGATGAGTAGCCGGCCTGAGAGGGTGATCGGCCACATTGGGACTGAGACACGGCCCAGACTCCTACG
GGAGGCAGCAGCTAAGAATCTTCCGCAATGGACGCAAGTCTGACGGAGCGACGCCGCGTGAATGAAGAAGGCCGAGAGGT
TGTAAAGTTCTTTTACTGGGGAGGAATAATGAGGTCAGGTAATGGGCTTCAGATGACGTTAACCAGTGAATAAGCCCCGG
CTAATTCCGTGCCAGCCGCCGCCGTAACAC
>OTU_108
GATGAACGCTAGCGGCAGGCCTAACACATGCAAGTCGAACGGTAACAGGGAAAAGCTTGCTTTTCCGCTGACGAGTGGCG
CACGGGTGCGCAACGCGTATAGAACCTACCTTTTACTGGAGAATAGCCCAGAGAAATTTGGATTAATGCTCCATAGTATT
GTTTTGAGGCATCTTAAGATGATTAAAGGTTACGGTAAAAGATGGCTATGCGTCCTATTAGTTAGTTGGTAAGGTAACGG
CTTACCAAGACGTCGATAGGTAGGGGCCCTGAGAGGgggATCCcccACACTGGTACTGAGACACGGACCAGACTCCTACG
GGAGGCAGCAGTGAGGAATATTGGACAATGGGCGGAAGCCTGATCCAGCCATGCCGCGTGCAGGAAGACAGCCCTATGGG
TTGTAAACTGCTTTTATACAGGAAGAATAAGTCCCTTGCGAGGGATGATGACGGTACTGTAAGAATAAGGACCGGCTAAC
TCCGTGCCAGCCGCCGCCGTAACAC
>OTU_109
AATGAACGCTGGCGGCGTGGATAAGACATGCAAGTCGAACGAgagaACTGATTAGTTTACTAGGATGTATCTCTAGTGGC
GGACGGGTTAGTAACACGTGAGCAACATGCCTCGAAGTGGgggATAGCCTTCCGAAAGGGAGATTAATACCGCATGTGAC
CTTCGGGTCAAAGGCGCCTTCGGGTGTCGCTTTGAGATTGGCTCGCGGCCTATCAGCTTGTTGGTGAGGTAACGGCTCAC
CAAGGCAACGACGGGTAGCTGGTCTGAGAGGACGATCAGCAACACTGGAACTGAGACACGGTCCAGACACCTACGGGTGG
CAGCAGTCGAGAATCATTCACAATGGgggCAACCCTGATGGTGCAACGCCGCGTGGAGGATGAAGGCCCTAGGGTCGTAA
ACTCCTGTCATGTGAGAGTAAGGCATAGTAGGTTAAGAGCTAGCTATGTTTGATAGTATCACAAGAGGAAGGGACGGCTA
ACTTCGTGCCAGCCGCCGCCGTAACAC
>OTU_110
ATTGAACGCTGGCGGCGTGCTTAACACATGCAAGTCGTGCGAGAAAGCTctctTCGGAGAGTGAGTACAGCGGCGCACGG
GTGAGTAACGCGTGGATAACGTACCATGGAGTTCGGGATAACAGTTGGAAACGGCTGCTAATACCGGATAATCTGCGAAT
GAACTTTTGTGGGAAAGGAGGCCTCTGATTCAAGCTTCTGCTCAATGATCGGTCCGCGTTTCATTAGCTTGTTGGTGGGG
TAACGGCTCACCAAGGCAACGATGAATAGCTGGTCTGAGAGGATGATCAGCCACACTGGGACTGGAACACGGCCCAGACT
CCTACGGGAGGCAGCAGTGGGGAATATTGCGCAATGGGCGAAAGCCTGACGCAGCGACGTCGCGTGAGGGAAGAAGGCTC
TCGGGTCGTAAACCTCTGTCAGGggggAAGAACCCCGTAGATTCTAATAGGATTTACGGCTGACGGTACCcccAGAGGAA
GCACCGGCTAACTCCGTGCCAGCCGCCGCCGTAACAC
>OTU_111
GACGAACGCTGGCGGCGTGTTTAACCCATGCAAGTTGAACGAGAACTTTCTAGTGGAATCTTCGGATGAATTTAGAGAAA
GAAAGTAGCGAACGGGTGAGTAACGCGTGAATAACCAACCCTCCACAGGgggACAACAGCTGGAAACGGCTGCTAATACC
GCATAAGACCACACTAACACATGTTAGagagGTAAaaaCTACGGTGGTGGAGGACGGGTTCGCGTTCCATTAGCTAGTAG
GTGAGGTAACGGCTCACCTAGGCTACGATGGATAGCCGAGCTGAGAGGCTGATCGGCCACACTGGAACTGAGACACGGTC
CAGACTCCTACGGGAGGCAGCAGGGAAGAATATTGTACAATGGgggAAACCCTGATACAGCAACGCCGCGTGAAGGAAGA
AGGCCTTCGGGTTGTAAACTTCTGTGATGGgggACGAAaaaaaTGACGGTACCCCAAGAGGAAGCCCCGGCAAACTACGT
GCCAGCCGCCGCCGTAACAC
>OTU_112
AACGAACGCTGGCGGCGTGCTTAACACATGCAAGTCGAACGAGAAAGTTCCTTCGGGGACGAGTAGAGTGGCGCACGGGT
GAGTAACACATAGGAACGTACCGATTAGTGGGGAATAACCACGGGAAACTGTGGCTAATACCGCATAACATCGAAAGATT
AAAGGgggCCTCTGCATATGCTCTCGCTAATTGATCGGCCTATGTCCCATTAGCTTGTTGGTAGGGTAATGGCCTACCAA
GGCAGTGATGGGTAGCTGGTCTGAGAGGATGATCAGCCACACTGGGACTGAGACACGGCCCAGACTCCTACGGGAGGCAG
CAGTGGGGAATCTTGCACAATGGGCGAAAGCCTGATGCAGCAACGCCGCGTGAGTGAAGAAGGCCCTTGGGTTGTAAAGC
TCTTTCAGATAGGAAGAAGGGTGCAGTGGTTAATACCCGCAGCATCTGACGGTACTGTAAGAAGAAGCACCGGCTAATTC
CGTGCCAGCCGCCGCCGTAACAC
>OTU_113
GATGAACGCTAGCGGCAGGCTTAACACATGCAAGTCGAGGGGTAACAGGGATTGCTTGCAATCCGCTGACGACCGGCGCA
CGGGTGCGTAACGCGTATAGAACCTACCTTTTACAGAGGGATAGCCTTTAGAAATGAAGATTAATACCTCATAGTACTGG
GTTGTGGCATCACAATCTAGTTAAAGATTTATCGGTAAAAGATGGCTATGCGTCCTATTAGCTAGATGGTAAGGTAACGG
CTTACCATGGCAACGATAGGTAGGGGTCCTGAGAGGGAGATCCcccACACTGGTACTGAGACACGGACCAGACTCCTACG
GGAGGCAGCAGTGAGGAATATTGGACAATGGGCGAGAGCCTGATCCAGCCATGCCGCGTGCAGGAAGACTGCCCTATGGG
TTGTAAACTGCTTTTATACAGGAAGAAACCTATCTACGTGTAGATAGCTGACGGTACTGTAAGAATAAGCACCGGCTAAC
TCCGTGCCAGCCGCCGCCGTAACAC
>OTU_114
AACGAACGCTGGCGGCAGGCCTAACACATGCAAGTCGAACGAGAAAGCACCTTCGGGTGTGATTAGAGTGGCGCACGGGT
GAGTAACGCGTGGGAACCTACCCTAAGGTACGGAATAACAGTTGGAAACGACTGCTAATACCGTATGTGCCCTACGGggg
AAAGATTTATCGCCTTAGGATGGGCCCGCGTCGGATTAGCTAGTTGGTGAGGTAAAGGCTCACCAAGGCTTCGATCCGTA
GCTGGTCTGAGAGGATGATCAGCCACACTGGAACTGAGACACGGTCCAGACTCCTACGGGAGGCAGCAGTGGGGAATATT
GCGCAATGGgggCAACCCTGACGCAGCCATGCCGCGTGAGTGAAGAAGGTCTTCGGATCGTAAAGCTCTTTCAACGGGGA
AGATGATGACGGTACCCGTAGAAGAAGCCCCGGCTAACTTCGTGCCAGCCGCCGCCGTAACAC
>OTU_115
ATTGAACGCTGGCGGCAGGCCTAACACATGCAAGTCGGGCGGTAACAGGGATAGCTTGCTATCTGCTGACGAGCGGCGGA
CGGGTGAGTAATGCATAGGAATCTGCCTGGTAGTGGgggATAGCCCAGAGAAATTTGGATTAATACCGCATACGCCCTAC
GGgggAAAGCAGGGGATCTTCGGACCTTGCGCTATCAGATGAGCCTATGTCGGATTAGCTTGTTGGTGAGGTAACGGCTC
ACCAAGGCGACGATCCGTAGCTGGTCTGAGAGGATGATCAGCCACACTGGGACTGAGACACGGCCCAGACTCCTACGGGA
GGCAGCAGTGGGGAATATTGGACAATGGGCGCAAGCCTGATCCAGCCATGCCGCGTgtgtgAAGAAGGCCTTCGGGTTGT
AAAGCACTTTCAGCGAGGAGGAAAGGGGTGTTGCTAATATCAACGCCCTGTGACGTTACTCGCAGAAGAAGCACCGGCTA
ACTCCGTGCCAGCCGCCGCCGTAACAC
>OTU_116
GACGAACGCTGGCGGCGTGCTTAACACATGCAAGTCGAACGGAAAGGCCCTGCTTTTGTGGGGTGCTCGAGTGGCGAACG
GGTGAGTAACACGTGAGTAACCTGCCCTTGACTTTGGGATAACTTCAGGAAACTGGGGCTAATACCGGATAGGAGCTCCT
GCTGCATGGTGGgggTTGGAAAGTTTCGGCGGTTGGGGATGGACTCGCGGCTTATCAGCTTGTTGGTGGGGTAGTGGCTT
ACCAAGGCTTTGACGGGTAGCCGGCCTGAGAGGGTGACCGGCCACATTGGGACTGAGATACGGCCCAGACTCCTACGGGA
GGCAGCAGTGGGGAATATTGCACAATGGGCGGAAGCCTGATGCAGCAACGCCGCGTGCGGGATGACGGCCTTCGGGTTGT
AAACCGCTTTCGCCTGTGACGAAGCGTGAGTGACGGTAATGGGTAAAGAAGCACCGGCTAACTACGTGCCAGCCGCCGCC
GTAACAC
>OTU_117
AATGAACGTTGGCGGCATGGATTAGGCATGCAAGTCGAGCGAGAAGGCTTAGTTTGACACTTCGGTAGATTTCTAAGCTG
GACAGCGGCGAAAGGGTGAGTAACGCGTAGTTACCTGCCTCAGGGTTGGGAATAGCCACGGGAAACTGTGGGTAATGCCC
AATAATATCTCCGGATCAAAGGTGAGATTCCGCCCTGAGAGGGGACTGCGTCCTACTAGCTTGTTGGTGGGGTAATGGCC
TACCAAGGCTCCGATGGGTAGCGGGCGTGAGAGCGTGGCCCGTCACACTGGGACTGAGACACTGCCCAGACACCTACGGG
TGGCTGCAGTCGAGAATCTTCGGCAATGGACGAAAGTCTGACCGAGCAATGCCGCGTGCGGGATGAAGGCCCTCGGGTTG
TAAACCGCTGTCAGTTGGGAGGAAGGCTCCGTGAAGAGCGGAGTTTGACCTATCTTCAGAGGAAGTACGGGCTAAGTTCG
TGCCAGCCGCCGCCGTAACAC
>OTU_118
AACGAACGCTGGCGGCAGGCCTAACACATGCAAGTCGAACGGAGCCTTCGGGCTTAGTGGCGCACGGGTGAGGAACACGT
GGGAATGTACCCTTCGGTAAGGAATAATATCTGGAAACGGATACTAATACCTTATAATGACTTCGGTCCAAAGATTTATC
GCCGAGGGATCAGCCCGCGTATGATTAGATAGTTGGTGAGGTAATGGCTCACCAAGTCGACGATCATTAGGgggTCTGAG
AGGATGATCCcccACACTGGTACTGAGACACGGACCAGACTCCTACGGGAGGCAGCAGTGAGGAATATTGCGCAATGGgg
gAAACCCTGACGCAGCCATGCCGCGTGAGTGAAGAAGGCCTTAGGGTTGTAAAGCTCTTTCAATAGTGAAGATTATGACG
GTAACTATAGAAGAAGCCCCGGCTAAATTCGTGCCAGCCGCCGCCGTAACAC
>OTU_119
AATGAACGTTGGCGGCGTGGATTAGGCATGCAAGTCGCACGAGAAACCAATTAGCTTGCTATGAGGTGGACAGTGGCGAA
AGGGAGAGTAACGCGTGGTTACATGCCCTCGAGACCGGGATAGTGTCGGGAAACTGGCAGTAATACCGGATAACATCTTC
GGATCAAATGGTGTGATTCCGCTCGAGGATTGGACCGCGTACTATTAGCTTGTTGGTGAGGTAATGGCTCACCAAGGCTG
CGATGGTTACCGGGTGTGAGAGCATGGCCCGGCTCACTGGGACTGAGACACTGCCCAGACATCTACGGATGGCTGCAGTC
GAGAATCTTCGGCAATGGACGAAAGTCTGACCGAGCGACGCCGCGTGCGGGATGAAGGCCCTCGGGTTGTAAACCGCTGT
CAGTTGTTAGGAAATCCATGAGGGTTCtctctcATGGTTGACCGATCTTCAGAGGAAGGACGGGCTAAGTTCGTGCCAGC
CGCCGCCGTAACAC
>OTU_120
AACGAACGCTGGCGGCAGGCCTAACACATGCAAGTCGAGCGAAGCCTTCGGGCTTAGCGGCGGACGGGTTAGTAACGCGT
GGGAACGTGCCTctctctACGGAATAGTCCCGGGAAACTGGGTTTAATACCGTATACGCCCTTTGGgggAAAGATTTATC
GGAgagagaTCGGCCCGCGTTAGATTAGATAGTTGGTGGGGTAACGGCCTACCAAGTCTACGATCTATAGCTGGTTTGAG
AGGATGATCAGCAACACTGGGACTGAGACACGGCCCAGACTCCTACGGGAGGCAGCAGTGGGGAATCTTAGACAATGGGC
GCAAGCCTGATCTAGCCATGCCGCGTGAGTGAAGAAGGCCTTAGGGTCGTAAAGCTCTTTCGCCTGTGAAGATAATGACG
GTAGCAGGTAAAGAAACCCCGGCTAACTCCGTGCCAGCCGCCGCCGTAACAC
>OTU_121
AACGAACGCTGGCGGCAGGCCTAACACATGCAAGTCGAACGTGAAGCAGGAGCTTGCTCCTGTGGAAAGTGGCAGACGGG
TGAGTAACGCGTGGGAATCTACCCAGCTCTACGGAATAACGCAGGGAAACTTGTGCTAATACCGTATACGTCCTCCGGGA
GAAAGATTTATCGGAGTTGGATGAGCCCGCGTTAGATTAGTTTGTTGGTGGGGTAACGGCCTACCAAGACTACGATCTAT
AGCTGGTCTGAGAGGATGATCAGCCACACTGGGACTGAGACACGGCCCAGACTCCTACGGGAGGCAGCAGTGGGGAATAT
TGCACAATGGGCGCAAGCCTGATGCAGCCATGCCGCGTGAGTGAAGAAGGCCTTAGGGTTGTAAAACTCTTTCACCGGTG
AAGATAATGACGGTAGCCGGAGAAGAAGCCCCGGCTAACTCCGTGCCAGCCGCCGCCGTAACAC
>OTU_122
GATGAACGCTGGCGGCGTGCTTAACACATGCAAGTCGAGCGAGAAGTTTGTTATTGATCCTTCGGGTGATTTAATAAATG
GAAAGCGGCGGACGGGTGAGTAACGCGTGGGTAACCTACCCTGTGCAGGgggACAACAGTTAGAAATGACTGCTAATACC
GCATAAGACTACAGCATCTCATGATGCAGTAGTAAaaaCTCCGGTGGCACAGGATGGACCCGCGTCTGATTAGCTAGTTG
GTGAGGTAAGGGCTCACCAAGGCGACGATCAGTAGCCGGCCTGAGAGGGCGGACGGCCACATTGGGACTGAGACACGGCC
CAAACTCCTACGGGAGGCAGCAGTGGGGAATATTGCACAATGGgggAAACCCTGATGCAGCGACGCCGCGTGAAGGAAGA
AGGTTTTCGGATCGTAAACTTCTATCAGCAGGGAAGAAAATGACGGTACCTGACTAAGAAGCCCCGGCTAACTACGTGCC
AGCCGCCGCCGTAACAC
>OTU_123
AACGAACGCTGGCGGCAGGCCTAACACATGCAAGTCGAACGCCCTCTTCGGAGGGAGTGGCAGACGGGTGAGTAACGCGT
GGGAACCTACCCAAGGGTACGGAATAACTCCGGGAAACCGGCGCTAATACCGTATACGTCCTTTTGGAGAAAGATTTATC
GCCCCTGGATGGGCCCGCGTTGGATTAGCTAGTTGGTGGGGTAATGGCCTACCAAGGCGACGATCCATAGCTGGTCTGAG
AGGATGATCAGCCACACTGGGACTGAGACACGGCCCAGACTCCTACGGGAGGCAGCAGTGGGGAATATTGGACAATGGGC
GCAAGCCTGATCCAGCCATGCCGCGTGAGTGATGAAGGCCCTAGGGTTGTAAAGCTCTTTCAGTGGTGAAGATAATGACG
GTAACCACAGAAGAAGCTCCGGCTAACTCCGTGCCAGCCGCCGCCGTAACAC
>OTU_124
GATGAACGCTAGCGGCAGGCCTAACACATGCAAGTCGAACGGTAACAGCGGAGCTTGCTCCGGCTGACGAGTGGCGCACG
GGTGCGTAACGCGTATACAATCTACCTTTTACAGGGGTATAGCCTTTAGAAATGAAGAATAATCCcccATAATATCTTAT
AGTGGCATCACTAAAAGATTAAAGCTTCGGTGGTAAGAGATGAGTATGCGTTCTATTAGCTAGTAGGTGAGGTAACGGCT
CACCTAGGCGACGATAGATAGGGGCCCTGAGAGGgggATCCcccACACTGGTACTGAGACACGGACCAGACTCCTACGGG
AGGCAGCAGTGAGGAATATTGGACAATGGGCGCAAGCCTGATCCAGCCATGCCGCGTGCAGGAAGACTGCCCTATGGGTT
GTAAACTGCTTTTAtataGGAAGAAACCATTCTACGTGTAGAGTGCTGACGGTACTATAAGAATAAGCATCGGCTAACTC
CGTGCCAGCCGCCGCCGTAACAC
>OTU_125
AACGAACGCTGGCGGCAGGCCTAACACATGCAAGTCGAACGGATCCTTCGGGATTAGTGGCAGACGGGTGAGTAACGCGT
GGGAAGCTACCTTGTGGTAGGGAACAACAGTTGGAAACGACTGCTAATACCCTATGAGCCCTATGGgggAAAGATTTATC
GCCATGAGATGTGCCCGCGTTAGATTAGCTAGTTGGTAAGGTAATGGCTTACCAAGGCGACGATCTATAGCTGGTCTGAG
AGGATGATCAGCCACACTGGGACTGAGACACGGCCCAGACTCCTACGGGAGGCAGCAGTGGGGAATATTGGACAATGGgg
gCAACCCTGATCCAGCCATGCCGCGTGAGTGATGACGGCCTTAGGGTTGTAAAGCTCTTTCAGCAGTGAAGATAATGACA
TTAACTGCAGAAGAAGCCCCGGCTAACTTCGTGCCAGCCGCCGCCGTAACAC
>OTU_126
AACGAACGCTGGCGGCAGGCTTAACACATGCAAGTCGAGCGAAGACTTCGGTCTTAGCGGCGGACGGGTGAGTAACGCGT
GGGAACGTGCCTTTTGCTACGGAATAGCCCCGGGAAACTGGGAGTAATACCGTATACGCCCTTTGGgggAAAGATTTATC
GGCAAGAGATCGGCCCGCGTTGGATTAGGTAGTTGGTGGGGTAATGGCCTACCAAGCCGACGATCCATAGCTGGTTTGAG
AGGATGATCAGCCACACTGGGACTGAGACACGGCCCAGACTCCTACGGGAGGCAGCAGTGGGGAATCTTAGACAATGGgg
gCAACCCTGATCTAGCCATGCCGCGTgtgtgATGAAGGCCTTAGGGTCGTAAAGCACTTTCGCCAGGGATGATAATGACA
GTACCTGGTAAAGAAACCCCGGCTAACTCCGTGCCAGCCGCCGCCGTAACAC
>OTU_127
GATGAACGCTGGCGGCGTGCCTAACACATGCAAGTCGAGCGGAGATTAAaaaGCTTGCTTtttAATCTTAGCGGCGGACG
GGTGAGTAACGCGTGGGTAACCTGCCCTATACacacGGATAACATATCGAAAGATATGCTAATACGAGATAACACATTtt
tAAGGCATCTTAGAAATGTCAAAGCGTTAGCGGTATAGGATGGACCCGCGTCCCATTAGCTAGTTGGTGAGGTAAAAGCT
TACCAAGGCGACGATGGGTAGCCGACCTGAGAGGGTGATCGGCCACACTGGAACTGAGACACGGTCCAGACTCCTACGGG
AGGCAGCAGTGGGGAATATTGCACAATGGgggAAACCCTGATGCAGCAACGCCGCGTGAGCGATGAAGGCCTTCGGGTCG
TAAAGCTCTGTCCTAAGGGAAGATAATGACGGTACCTTAGGAGGAAGCCCCGGCTAACTACGTGCCAGCCGCCGCCGTAA
CAC
>OTU_128
AACGAACGCTGGCGGCAGGCTTAACACATGCAAGTCGAACGCTGAAGCTGACTTCGGTTAGTGGATGAGTGGCAGACGGG
TGAGTAACGCGTGGGAACCTACCCAGAGGTACGGAACAACACAGAGAAATTTGTGCTAATACCGAATACACCCTTCGGgg
gAAAGATTTATCGCCTTTGGATGGGCCCGCGTTTGATTAGCTAGTTGGTGAGGTAATGGCTCACCAAGGCGACGATCAAT
AGCTGGTCTGAGAGGATGATCAGCCACACTGGGACTGAGACACGGCCCAGACTCCTACGGGAGGCAGCAGTGGGGAATAT
TGGACAATGGGCGCAAGCCTGATCCAGCCATGCCGCGTGAGTGATGAAGGCCCTAGGGTTGTAAAGCTCTTTCAACGGTG
AAGATAATGACGGTAACCGTAGAAGAAGCCCCGGCTAACTTCGTGCCAGCCGCCGCCGTAACAC
>OTU_129
GATGAACGCTAGCGGCAGGCTTAACACATGCAAGTCGAGGGGTAACAGGGATTGCTTGCAATCCGCTGACGACCGGCGCA
CGGGTGCGTAACGCGTATAGAACCTACCTTTTACAGAGGGATAGCCTTTAGAAATGAAGATTAATACCTCATAGTATTGT
GAAGTGGCATCACTTTATAATTAAAGATTTATCGGTAAAAGATGGCTATGCGTTCTATTAGCTAGATGGTAAGGTAACGG
CTTACCATGGCAACGATAGATAGGGGCCCTGAGAGGgggATCCcccACACTGGTACTGAGACACGGACCAGACTCCTACG
GGAGGCAGCAGTGAGGAATATTGGTCAATGGAGGCAACTCTGAACCAGCCATGCCGCGTGCAGGAAGACTGCCCTATGGG
TTGTAAACTGCTTTTATACGGGAAGAAACATCTCCACGTGTGGAGACTTGACGGTACCGTAAGAATAAGCACCGGCTAAC
TCCGTGCCAGCCGCCGCCGTAACAC
>OTU_130
AACGAACGCTGGCGGCATGGCTAAGACATGCAAGTCGTACGGACCACTTtttGCTTGCATTGAGTGGTTAGTGGCGAAAG
GGAGAGTAATGCATGGATAACGTACCCTGGATTTCGGGATAACTACGCCCTCGGGCTTTAGCGAAAGTGTAGCTAATACC
GAATGACACCACTCTGGTACCTATCAGAGTGATCAAAGGTGGCTTCGGCTGCTGATCTGGGAGCGGTCCATGTCCTATCA
GCTTGTTGGTGGGGTAATGGCCCACCAAGGCTTCGACGGGTAGCGGGCGTGAGAGCGTGAACCGCCTCATCGGGACTGAG
ACACTGCCCGGACACCTACGGGTGGCTGCAGTAACGAATATTGGGCAATGGGCGAAAGCCTGACCCAGCAATGCCGCGTG
CAGGAGGAAGCCCCTCGGGGTGTAAACTGCTGTCAGGGTTTAGCAAGCAAGGGAGGTTAATAGCCTCCTGCGTTGAGCAG
ACCCAAAGGAAGCCTCGGCTAACTCTGTGCCAGCCGCCGCCGTAACAC
>OTU_131
AACGAACGCTGGCGGCGTGTTTAAGACATGCAAGTCGAACGAGATGACACCGGTATTTATATTGGTTGACTCTAGTGGCG
CACGGGTGAGGAACACGTGAACAACATACCCTCGAGTGGgggATAGCCCGCCGAAAGGCGGATTAATACCCCATGGTATC
TTCGGATTAAAGATGGCTTCGGCTGTCGCTTGAGGATTGGTTCGCGCCCTATCAGCTTGTTGGTGAGGTAACGGCTCACC
AAGGCTACGACGGGTACCTGGTTTGAGAGGATGATCAGGCACACTGGAACTGAGACACGGTCCAGACACCTACGGGTGGC
AGCAGTCGAGAATAATTCACAATGGGCGAAAGCCTGATGGTGCAACGCCGCGTGGAGGATGACGGTCTTCGGATTGTAAA
CTCCTGTCATCAGGGAGTAAGACCTGGGTGTTAATAGCAcacaGGGTTGATAGTACCTGAAGAGGAAGGGACGGCTAACT
TCGTGCCAGCCGCCGCCGTAACAC
>OTU_132
GATGAACGCTAGCGGCAGGCCTAACACATGCAAGTCGAGGGGTAACGGGAAaaaGCTTGCTTttttGCTGACGACCGGCG
CACGGGTGCGGAACGCGTATGGAACCTGCCCCTGTCAGGGGAATAGCCCAGAGAAATTTGGATTAATGCCCCATGGTATC
CTACCACTGCATGGTGGAAGGATTAAAGATTTATCGGACAGGGATGGCCATGCGTACCATTAGCTTGTTGGTGAGGTAAC
GGCTTACCAAGGCAACGATGGTTAGGGGCCCTGAGAGGgggATCCcccACACTGGTACTGAGACACGGACCAGACTCCTA
CGGGAGGCAGCAGTGAGGAATATTGGACAATGGTCGGGAGACTGATCCAGCCATGCCGCGTGCAGGATGACTGCCCTATG
GGTTGTAAACTGCTTTTACATGGGAAGAAACCTATCTACGTGTAGATAGCTGACGGTACCATGAGAATAAGGACCGGCTA
ACTCCGTGCCAGCCGCCGCCGTAACAC
>OTU_133
AACGAACGCTGGCGGCAGGCCTAACACATGCAAGTCGAGCGCACCTTCGGGTGAGCGGCGGACGGGTTAGTAACGCGTGG
GAATATACCCTTCTCTACGGAATAGCCTCGGGAAACTGAGAGTAATACCGTATAAGCCCTTCGGgggAAAGATTTATCGG
TGAAGGATTAGCCCGCGTTAGATTAGATAGTTGGTGGGGTAATGGCCTACCAAGTCTACGATCTATAGCTGGTTTTAGAG
GACGATCAGCAACACTGGGACTGAGACACGGCCCAGACTCCTACGGGAGGCAGCAGTGGGGAATCTTAGACAATGGGCGA
AAGCCTGATCTAGCCATGCCGCGTGAGTGATGAAGGCCCTAGGGTCGTAAAGCTCTTTCGCCAGGGATGATAATGACAGT
ACCTGGTAAAGAAACCCCGGCTAACTCCGTGCCAGCCGCCGCCGTAACAC
>OTU_134
AATGAACGTTGGCGGCATGGATTAGGCATGCAAGTCGCACGAGAACCCAATTAGCTTGCTATGAGGgggACAGTGGCGAA
AGGGAGAGTAACGCGTGGTTATGTACCTTCGAGACCGGGATAGTGTCGGGAAACTGGCAGTAATACCGGATAACATCTTC
GGATCAAATGGTGTGATTCCGCTCGAAGATCGGACCGCGTACTATTAGCTTGTTGGTGAGGTAATGGCTCACCAAGGCTG
CGATGGTTACCGGGTGTGAGAGCATGGCCCGGCTCACTGGGACTGAGACACTGCCCAGACATCTACGGATGGCTGCAGTC
GAGAATCTTCGGCAATGGACGAAAGTCTGACCGAGCGATGCCGCGTGCGGGATGAAGGCCCTCGGGTTGTAAACCGCTGT
CAGTTGTTAGGAAATCTATAGGGGTTCtctcCTATGGTTGACCGATCTTCAGAGGAAGGACGGGCTAAGTTCGTGCCAGC
CGCCGCCGTAACAC
>OTU_135
AACGAACGCTGGCGGCAGGCCTAACACATGCAAGTCGAGCGCTTCCTTCGGGAAGAGCGGCGGACGGGTTAGTAACGCGT
GGGAACGTGCCTctctctACGGAATAGCCATTGGAAACGATGAATAATACCGTATACGCCCTTTGGgggAAAGATTTATC
GGAgagagaTCGGCCCGCGTTAGATTAGTTAGTTGGTGGGGTAACGGCTTACCAAGACGACGATCTATAGCTGGTTTGAG
AGGATGATCAGCAACACTGGGACTGAGACACGGCCCAGACTCCTACGGGAGGCAGCAGTGGGGAATCTTAGACAATGGgg
gCAACCCTGATCTAGCCATGCCGCGTGAGTGAAGAAGGCCTTAGGGTCGTAAAGCTCTTTCGCCTGTGAAGATAATGACG
GTAGCAGGTAAAGAAACCCCGGCTAACTCCGTGCCAGCCGCCGCCGTAACAC
>OTU_136
AACGAACGCTGGCGGCGTGGATTAGGCATGCAAGTCGAGCGGGATTTATATGACGGATTCCTTCGGGATGAAGACATATA
ATGAGAGCGGCGAACGGGTGAGGAATACTTGAGTAATTTGCCCTTAAGTCAGGGATAGCCACTGGAAACGGTGATTAATA
CCTGATGTGGTCCCTTACTGCATGGTAAGGTGTCTAAAGGCGGAACCTTCGGGTCTGTCGCTTAAGGATAGGCTCAAGCC
CTATCAGCTTGTTGGTGAGGTAATGGCTCACCAAGGCTAAGACGGGTAGCTGGTCTGAGAGGATGGTCAGCCACACTGGG
ACTGAGACACTGCCCAGACTCCTACGGGAGGCTGCAGTCGAGAATCATTCACAATGCGCGAAAGCGTGATGATGCGACGT
CGCGTGGAGGACTAAGGCCCTATGGGTCGTAAACTCCTGTCAGAAGGGAAGAAGTGCAGCAGGGAATAATACCCCTGTTG
TTTGACGGTACCTTCAGAGGAAGCCACGGCTAACTTCGTGCCAGCCGCCGCCGTAACAC
>OTU_137
AACGAACGCTGGCGGCAGGCCTAACACATGCAAGTCGAACGAGACCTTCGGGTCTAGTGGCGCACGGGTGCGTAACGCGT
GGGAATCTACCCTTAGGTGCGGAATAACTCAGAGAAATTTGAGCTAATACCGCATAATGACTCCGGTCCAAAGATTTATC
GCCTAAGGATGAGCCCGCGTAAGATTAGCTAGTTGGTGAGGTAAAAGCTCACCAAGGCGACGATCTTTAGCTGGTCTGAG
AGGACGACCAGCCACACTGGGACTGAGACACGGCCCAGACTCCTACGGGAGGCAGCAGTGGGGAATATTGGACAATGGGC
GCAAGCCTGATCCAGCCATGCCGCGTGAGTGATGAAGGCCTTAGGGTTGTAAAGCTCTTTTACCAGGGATGATAATGACA
GTACCTGGAGAATAAGCTCCGGCTAACTCCGTGCCAGCCGCCGCCGTAACAC
>OTU_138
GACGAACGCTAGCGGCgcgcCTAACACATGCAAGTCGAACGAGGTCCATGGAGCTTGCTCCGGAAGACCTAGTGGCGAAC
GGGTGAGTAACACGTGAGAAACCTGCCCCGAACTCCGGGATAACCCAGGGAAACTTGGACTAATACCGGATACCCTCAAT
GAGTCGCATGGCTCGATGAGGAAAGTTtttCGGTTCGGGAGGGTCTCGCGGCCTATCAGCTTGTTGGTGAGGTAACGGCT
CACCAAGGCAACGACGGGTAGCTGGTTTGAgagaATGATCAGCCACACTGGGACTGAGACACGGCCCAGACTCCTACGGG
AGGCAGCAGTGGGGAATCTTGCGCAATGGGCGAAAGCCTGACGCAGCGACGCCGCGTGCGGGATGACGGCCTTCGGGTTG
TAAACCGCTTTCGGCAGGGACGAAAATGACGGTACCTGCAGAAGAAGCCCCGGCTAACTACGTGCCAGCCGCCGCCGTAA
CAC
>OTU_139
GACGAACGCTGGCGGCGTGCCTAATACATGCAAGTCGAACGAGATCCCAGACTTCGGTCTGGgggACAGTGGCGAACGGG
TGAGTAACACGTGAGAAACCTGCCCCGGAGACCGGGACAACCGTTGGAAACGACGGCTAATACCGGATGCCTTCACATGG
TCGCATGGCCGAGTGAAGAAAGGCTCCGGCGCTCCGGGAGGGTCTCGCGGCCTATCAGCTAGTTGGTGGGGTAACGGCCT
ACCAAGGCATCGACGGGTAGCTGGTCTGAGAGGACGATCAGCCACACTGGGACTGAGACACGGCCCAGACTCCTACGGGA
GGCAGCAGTAGGGAATATTGCGCAATGGgggAAACCCTGACGCAGCAACGCCGCGTGTGGGATGACGGCTTTCGGGTTGT
AAACCACTTTCAGTGATGACGAAAATGACGGTAATCACAGAAGAAGGTCCGGCCAACTACGTGCCAGCCGCCGCCGTAAC
AC
>OTU_140
AACGAACGCTGGCGGCAGGCCTAACACATGCAAGTCGAGCgcgcTCTTCGGAGTGAGCGGCGGACGGGTTAGTAACGCGT
GGGAACGTACCCAGATCTACGGAATAGCCTCGGGAAACTGAGAGTAATACCGTATACGCCCTTCGGgggAAAGATTTATC
GGATTTGGATCGGCCCGCGTTAGATTAGATAGTTGGTGAGGTAACGGCTCACCAAGTCTACGATCTATAGCTGGTTTTAG
AGGATGATCAGCAACACTGGGACTGAGACACGGCCCAGACTCCTACGGGAGGCAGCAGTGGGGAATCTTGGACAATGGGC
GCAAGCCTGATCCAGCCATGCCGCGTGAGTGATGAAGGCCTTAGGGTCGTAAAGCTCTTTCGCCAGAGATGATAATGACA
GTATCTGGTAAAGAAACCCCGGCTAACTCCGTGCCAGCCGCCGCCGTAACAC
>OTU_141
ATTGAACGCTGGCGGTATGCCTAACACATGCAAGTCGAACGGTAACAGagagaAGCTTGCTTCTTTGCTGACGAGTGGCG
GACGGGTGAGTAACGCGTGGGAATCTACCTTGTAGTTGGGGATAGCCCGGAGAAATCCGGATTAATACCGAATAAGATCT
ACGGATGAAAAGGTGCCTCTGCTTGCAAGCACTTGCTATAAGATGAGCCCGCGTTAGATTAGTTAGTTGGTGGGGTAACG
GCCTACCAAGACGACGATCTATAGCTGGTTTGAGAGGATGATCAGCCACATTGGGACTGAGACACGGCCCAGACTCCTAC
GGGAGGCAGCAGTGGGGAATATTGGACAATGGGCGCAAGCCTGATCCAGCAATACCGCGTgtgtgAAGAAGGCCTTAGGG
TTGTAAAGCACTTTTATGTGGGAAGAAGGTGCATTGGTTAATAGCCGATGTACTTGACGGTACCACAAGAATAAGCACCG
GCTAACTCCGTGCCAGCCGCCGCCGTAACAC
>OTU_142
GATGAACGCTGGCGGTATGCTTTACACATGCAAGTCGTACGGAAGTGTTAAAACTTTAGTGGCGGACGGGTGAGTAACAC
GTGAGAATTTACCTTTAGGAGGGGAATAACAGTTGGAAACGACTGCTAATGCCGCATATCATatatTATGAAAGAAGAAA
TTCGCCTAAAGAAAAGCTTGCGTCTGATTAGCTAGTTGGTAAGGGTAAAGGCCTACCAAGGCGACGATCAGTAGCTGGTT
TGAGAGGACGACCAGTCACACTGGAACTGAGACACGGTCCAGACTCCTACGGGAGGCAGCAGTGGGGAATTTTCTGCAAT
GGGCGAAAGCCTGACAGAGCAATACCGCGTGAGGGAAGAAAGCCCACAGGGTTGTAAACCTCTTTTGTCAAGGAAGAAGT
TCTGACGTTACTTGACGAATAAGCATCGGCTAACTCCGTGCCAGCCGCCGCCGTAACAC
>OTU_143
GATGAACGCTGGCGGCGTGCCTAACACATGCAAGTCGAGCGAGAAGGTTATGATGGATTCTTCGGATGAAAGATTAACTG
GAAAGCGGCGGACGGGTGAGTAACGCGTGGGCAACCTGCCCTGTGCAGAGGGATAGCCACTGGAAACGGTGATTAATACC
TCATAATGCTAAAGTATCGCATGGTACTTTAGTCAAAGATTTATCGGCACAGGATGGGCCCGCGTCTGATTAGCTAGTTG
GTAAGGTAAAAGCTTACCAAGGCGACGATCAGTAGCCGACCTGAGAGGGTGATCGGCCACACTGGAACTGAGACACGGTC
CAGACTCCTACGGGAGGCAGCAGTGGGGAATATTGCACAATGGGCGCAAGCCTGATGCAGCAACGCCGCGTGAGTGATGA
AGGCTTTCGGGTCGTAAAACTCTGTCCTCAGGGAAGAATAATGACGGTACCTGAGGAGGAAGCCCCGGCTAACTACGTGC
CAGCCGCCGCCGTAACAC
>OTU_144
AATGAACGTTGGCGGCGTGGATTAGGCATGCAAGTCGTGCGGTAAGGCTCCTTCGGGAGTACACGAGCGGCGAAAGGGAG
AGTAACGCGTGGTTCATCTACCCTCGGGTCCGGAATAGCGTCGGGAAACTGGCGGTAATGCCGGATAACATCTTCGGATC
AAAGGTGTGATTCCGCCTGAGGATGAGACCGCGTCCTATTAGCTAGTTGGTGGGGTAAAAGCCTACCAAGGCTGTGATGG
GTATCGGGTGTGAGAGCATGGCCCGACTCACTGGGACTGAGACACTGCCCAGACACCTACGGGTGGCTGCAGTCGAGAAT
CTTCGGCAATGGGCGAAAGCCTGACCGAGCGACGCCGCGTGTGGGACTGAAGGCCTTCGGGTTGTAAACCACTGTCAGAG
GGAAGCAAATGCATGGTGGCTATCCATCATGTTTGAGTGATCCTCAGAGGAAGTCCGGGCTAAGTTCGTGCCAGCCGCCG
CCGTAACAC
>OTU_145
GTTGAACGCTGGCGGCAGGCCTAATACATGCAAGTCGAACGAGAACTTATTTGAGTTTACTTAAaaaaGTGAAAGTGGCA
GACGAGCGAGTAACACGTATGTATCTGCCCCGAACTCAGGGATAACTAGCCGAAAGGTTAGCTAATACCGGATAGTCCCG
TAAGGGTAAAGCTTTTGCGGTTCGGGAGGAGCATGCGGCCTATCAGCTTGTTGGTAAGGTAACGGCTTACCAAGGCTATG
ACGGGTACCTGGTGTGAGAGCATGACCAGGCGCGATGGGACTGAGACACGGCCCATACTCCTACGGGAGGCAGCAGTAGG
GAATCTTCCGCAATGGACGAAAGTCTGACGGAGCCATGCCGCGTGAAGGATGACGGCCCATGGGTTGTAAACTTCTTTTA
TACGGGAAGAAGATCTGACGGTACCGTATGAATAAGGACCGACTAATTACGTGCCAGCCGCCGCCGTAACAC
>OTU_146
GACGAACGCTGGCGGCAGGCTTAACACATGCAAGTCGAACGCCCCTTCGGgggAGTGGCAGACGGGTGAGTAACGCGTGG
GAATCTACCCAGTACTACGGAACAACACAGAGAAATTTGTGCTAATACCGTATACGCCCTAAGGgggAAAGATTTATCGG
TATTGGATGAGCCCGCGTTTGATTAGCTAGTTGGTGAGGTAACGGCTCACCAAGGCGACGATCAATAGCTGGTCTGAGAG
GATGATCAGCCACACTGGGACTGAGACACGGCCCAGACTCCTACGGGAGGCAGCAGTGGGGAATATTGGACAATGGGCGC
AAGCCTGATCCAGCCATGCCGCGTgtgtgATGAAGGCCCTAGGGTTGTAAAGCACTTTCAACGGTGAAGATAATGACGGT
AACCGTAGAAGAAGCTCCGGCTAACTTCGTGCCAGCCGCCGCCGTAACAC
>OTU_147
AACGAACGCTGGCGGCGTGCTTAACACATGCAAGTCGAACGAGAAAGTTCCTTCGGGGACGATTAGAGTGGCGCACGGGT
GAGTAATACATAGGAACGTACCATTCGGTGGGGAATAACCACGGGAAACTGTGGCTAATACCGCATAATATCGCAAGATT
AAAGGgggCCTCTGCATATGCTCTCGCCGATTGATCGGCCTATGTCCCATTAGCTTGTTGGTAGGGTAATGGCCTACCAA
GGCAGTGATGGGTAGCTGGTCTGAGAGGATGATCAGCCACACTGGGACTGAGACACGGCCCAGACTCCTACGGGAGGCAG
CAGTGGGGAATCTTGCACAATGGGCGAAAGCCTGATGCAGCAACGCCGCGTGAGTGAAGAAGGCCCTTGGGTTGTAAAGC
TCTTTCGACTAGGAAGAAGGGTGCCGTGGTTAATACCCGCAGCATTTGACGGTACTAGCAGAAGAAGCACCGGCTAATTC
CGTGCCAGCCGCCGCCGTAACAC
>OTU_148
ATTGAACGCTGGCGGCATGCTTAACACATGCAAGTCGAACGGTAACAGGCCCTTCGGGGTGCTGACGAGTGGCGGACGGG
TGAGTAACGCGTAGGAATCTACCTTGTAGTGGgggATAGCCCGAGGAAACTCGGATTAATACCGCATACGCTCTACGGAG
GAAAGTGGgggATCTTTTGACCTCACGCTACTAGATGAGCCTACGTCCGATTAGCTAGTTGGTGGGGTAAGAGCCTACCA
AGGCGACGATCGGTAGCTGGTCTGAGAGGATGATCAGCCACACTGGGACTGAGACACGGCCCAGACTCCTACGGGAGGCA
GCAGTGGGGAATATTGGACAATGGGCGAAAGCCTGATCCAGCAATGCCGCGTgtgtgAAGAAGGCCTGCGGGTTGTAAAG
CACTTTTCTGAAGGAAGAAATGCTTAAGGTTAATACCCTTAAGAGCTGACGGTACTTCAAGAATAAGCACCGGCTAACTC
CGTGCCAGCCGCCGCCGTAACAC
>OTU_149
ATTGAACGCTGGCGGCAGGCCTAACACATGCAAGTCGAGCGCGAACGTTCCTTCGGGAACAAGTAGAGCGGCGGACGGGT
GAGTAACGCGTGGGAAATTGCCCAGTAGTGGgggACAACATTCGGAAACGGATGCTAATACCGCATACGCCCTACGGggg
AAAGCAGGGGATCTTCGGACCTTGCGCTATTGGATATGCCCGCGTCGGATTAGCTAGTTGGTGAGGTAATGGCTCACCAA
GGCAACGATCCGTAGCTGGTCTGAGAGGATGATCAGCCACACTGGGACTGAGACACGGCCCAGACTCCTACGGGAGGCAG
CAGTGGGGAATATTGGACAATGGGCGCAAGCCTGATCCAGCCATGCCGCGTgtgtgAAGAAGGCCCTAGGGTTGTAAAGC
ACTTTCAGTAGGGAGGAAGGCCTTAAAGTTAATACCTTTGAGGATTGACGTTACCTACAGAAGAAGCACCGGCTAACTCC
GTGCCAGCCGCCGCCGTAACAC
>OTU_150
AATGAACGCTGACAATATGCTTTATACATGCAAGTTTTACGAAATAGTAAATTTCGTAGCGTACGGGTGAGTAAAAGTGC
AGAATGTTACCTTTTAGTTTAGAACAAaaaTACTTTTATAAAAGTATCAAATTCTCTTGATAATTAATAAAAGCTACTTA
AAATTTTATTTAGCTGCTAAAAGATAGGTTTGTGCAAGATTAGGTAGTTGGTATTTGTGATAGTTTACCAAGCCTTCGAT
CTTTAGTTGGTCTTAGAGGATGAACAACCACACTGGAACTGAAATAAGGTCCAGGCTAAATTtttGGCCAGCAGTAAGGA
ATATTGGACAATGAACGAAAGTTTGATCCAGCAATACTGTAATGAATTAAGACGATTTCATTTCTATGATTTGGAAaaaT
TCTTTTGTTAAaaaTGATAATGACGTTATTTAACAAATAAGTCCCGGCTAATGCTCGTGCCAGCCGCCGCCGTAACAC
>OTU_151
ATTGAACGCTGGCGGCAGGCCTAACACATGCAAGTCGAGCGCGAAAGATCTTCGGATTGAGTAGAGCGGCGGACGGGTGA
GTAACGCGTAGGAATCTACCCAGTAGCGGgggACAACATGGGGAAACTCATGCTAATACCGCATACGCCCTAGGggggAA
AGGCCGGGATCTTCGGACCGGTCGCTATTGGATGAGCCTGCGTTGGATTAGCTAGTTGGTGGGGTAAAGGCCTACCAAGG
CGACGATCCATAGCTGGTCTGAGAGGATGATCAGCCACACCGGGACTGAGACACGGCCCGGACTCCTACGGGAGGCAGCA
GTGGGGAATATTGCGCAATGGgggCAACCCTGACGCAGCCATGCCGCGTgtgtgAAGAAGGCCTTCGGGTTGTAAAGCAC
TTTCACCAGGGAAGAAAAGCTGCGGGTTAATAGCCCGTAGCCGTGACATTACCTGGACAAGAAGCACCGGCTAACTCCGT
GCCAGCCGCCGCCGTAACAC
>OTU_152
ATTGAACGCTGGCGGCATGCCTCATACATGCAAGTCGAACGGAAACAGGACGCTAGGATCCCTTCGGGGTGACTTTGTCG
CTGTCGAGTGGCGGACGGGTGAGTAACGCATAGGAATCTACCCAGTAGTGGgggACAACACGGAGAAATCCGTGCTAATA
CCGCATACGTCCTACGGGAGAAAACGGgggATCTTCGGACCTCGTGCTATTGGATGAGCCTATGTCAGATTAGCTTGTTG
GTAAGGTAACGGCTTACCAAGGCAACGATCTGTAGCTGGTCTGAGAGGATGATCAGCCACACTGGAACTGAGACACGGTC
CAGACTCCTACGGGAGGCAGCAGTAGGGAATATTGCACAATGGGCGAAAGCCTGATGCAGCAATGCCGCGTgtgtgAAGA
AGGCCTGCGGGTTGTAAAGCACTTTTGTCGGGAAAGAAaaaaTCTAGGTTAATACCCTTGATCTTGACGGTACCCGAAGA
ATAAGCACCGGCTAACTCCGTGCCAGCCGCCGCCGTAACAC
>OTU_153
ATTGAACGCTGGCGGCATGGCTAAAGCATGCAAGTCGAACGAGAAACAGGCTTCGGCCTGTGGACAGTGGCGAAAGGGTG
AGTAACGCGTTCCTTACGTACCCCGAGGTGGgggATAGGTCGGAGAAATCCGGCGTAATACCCCATATCTTCTCCGGAAG
AAAGGCTTCGGCCGCCTCGGGAGCGGGGAGCGTCCCATCAGGTTGTTGGTGAGGTAAAGGCTCACCAAGCCGAAGACGGG
TAGCGGGTGTGAGAGCATGGCCCGCCACATCGGGACTGAGACACTGCCCGGACTCCTACGGGAGGCTGCAGCGACGAATA
TTCCGCAATGCGCGAAAGCGTGACGGAGCAATGCCGCGTGCAGGATGAAGCGGCTTCGCCGTGTAAACTGCTGTCAGGGT
GTAGGAATACTGACCATACCCAAAGGAAGGACCGGCTAACCTCGTGCCAGCCGCCGCCGTAACAC
>OTU_154
GACGAACGCTGGCGGCGTGCCTAACACATGCAAGTCGAACGAGAACCGGGCTTCGGCCCGGGGACAGTGGCGAACGGGTG
AGTAACACGTGAGAAACCTGCCCTTGAGACCGGGACAACCGTTGGAAACGACGGCTAATACCGGATGCCCTCACATGGCC
GCATGGCCGAGTGAGGAAATGCTCAGGCGCTCAAGGAGGGTCTCGCGGCCTATCAGCTAGTTGGTGGGGTAACGGCCTAC
CAAGGCATCGACGGGTAGCTGGTCTGAGAGGACGATCAGCCACACTGGGACTGAGACACGGCCCAGACTCCTACGGGAGG
CAGCAGTGGGGAATATTGCGCAATGGgggAAACCCTGACGCAGCAACGCCGCGTGTGGGATGACAGCTTTCGGGTTGTAA
ACCACTTTCAGTGATGACGAAAATGACGGTAATCACAGAAGAAGGTCCGGCCAACTACGTGCCAGCCGCCGCCGTAACAC
>OTU_155
GATGAACGCTAGCGGCAGGCCTAACACATGCAAGTCGAGGGGTAACATAGAGAAGCTTGCTTTTCTGATGACGACCGGCG
CACGGGTGCGTAACGCGTATACAATCTACCTTATACTGGAGAATAGCCCAGAGAAATTTGGATTAATGCTCCATAGTATG
TTGAGTTCGCATGGACATGACATTAAAGGTTACGGTATAAGATGAGTATGCGTTCTATTAGCTAGATGGTGTGGTAACGG
CACACCATGGCAACGATAGATAGGGGCCCTGAGAGGgggATCCcccACACTGGTACTGAGACACGGACCAGACTCCTACG
GGAGGCAGCAGTGAGGAATATTGGACAATGGAGGCAACTCTGATCCAGCCATGCCGCGTGCAGGAAGACTGCCCTATGGG
TTGTAAACTGCTTTTATACAGGAAGAAACCGCTCTACGTGTAGAGCTCTGACGGTACTGTAAGAATAAGGATCGGCTAAC
TCCGTGCCAGCCGCCGCCGTAACAC
>OTU_156
AACGAACGCTGGCGGCGTGCTTAACACATGCAAGTCGAACGAGAACGGCTTCTTCGGAAGCTTAGTAGAGTGGCGCACGG
GTGAGTAACACGTGGGTAACCTACCCTCCGGCGGgggATAACCACTCGAAAGGGTGGCTAATACCGCATACGTTTGTCTG
CTCTTTGGGGCAGATTTGGAAAGCGGCGCAAGTCGCACCGGAGGATGGGCCCGCGGACCATTAGCTAGTTGGTGGGGTAA
TGGCCTACCAAGGCATCGATGGTTAGCTGGTCTGAGAGGATGATCAGCCACACTGGGACTGAGACACGGCCCAGACTCCT
ACGGGAGGCAGCAGTGGGGAATTTTGCGCAATGGGCGGAAGCCTGACGCAGCAACGCCGCGTgtgtgATGAAGGCCTTCG
GGTTGTAAAGCACTGTCTAGAGGGAAGAACAAGCGGgggTCAAACCTCGCCCTGACGGTACCTCTAAAGAAAGCACTGGC
TAACTCCGTGCCAGCCGCCGCCGTAACAC
>OTU_157
AACGAACGCTGGCGGCAGGCTTAACACATGCAAGTCGAGCGCTCACTTCGGTGGGAGCGGCAGACGGGTGAGTAACGCGT
GGGAACCTACCTAGTAGTGCGGAATAGCTCCTGGAAACGGGAATTAATACCGCATACGCCCTTTGGgggAAAGATTTATC
GCTATTAGATGGGCCCGCGTTGGATTAGTTAGTTGGTGGGGTAATGGCCTACCAAGACGACGATCTATAGCTGGTCTGAG
AGGATGATCAGCCACACTGGGACTGAGACACGGCCCAGACTCCTACGGGAGGCAGCAGTGGGGAATATTGGACAATGGgg
gCAACCCTGATCCAGCCATGCCGCGTGAGTGATGAAGGCCTTAGGGTTGTAAAGCTCTTTCGCTAGGGAAGATAATGACG
GTACCTAGTAAAGAAGCCCCGGCTAACTTCGTGCCAGCCGCCGCCGTAACAC
>OTU_158
AACGAACGCTGGCGGCAGGCCTAACACATGCAAGTCGAGCGCTctctTCGGAGGGAGCGGCGGACGGGTGAGTAACGCGT
GGGAATATGCCCTTCTCTACGGAATAGCCTCGGGAAACTGAGAGTAATACCGTATACGCCCTTTGGgggAAAGATTTATC
GGAGAAGGATTAGCCCGCGTTGGATTAGGTAGTTGGTGGGGTAATGGCCTACCAAGCCTACGATCCATAGCTGGTTTGAG
AGGATGATCAGCCACACTGGGACTGAGACACGGCCCAGACTCCTACGGGAGGCAGCAGTGGGGAATCTTAGACAATGGgg
gCAACCCTGATCTAGCCATGCCGCGTGAGTGACGAAGGCCCTAGGGTCGTAAAGCTCTTTCGCCTGTGATGATAATGACA
GTAGCAGGTAAAGAAACCCCGGCTAACTCCGTGCCAGCCGCCGCCGTAACAC
>OTU_159
AACGAACGCTGGCGGCGCGTTTTAAGCATGCAAGTCGAACGGTAGAGGTCCTTCGGGATCTTGAGAGTGGCGAACGGGTG
AGTAACACGTAGATGATCTGCCTTGAAGTTGGGGATAGCTCATGGAAACATGAGGTAATACCGAATAAGCTTtttGATGT
AAAGGTCAAaaaGGAAAGGAGCTTAGGCTTCGCTTTGAGATGAGTCTGCGGTTCATTAGCTAGTTGGTGGGGTAATGGCC
TACCAAGGCGACGATGAATAGCCGGCCTGAGAGGGTGATCGGCCACACTGGAACTGAGACACGGTCCAGACTCCTACGGG
AGGCAGCAGCTAAGAATCTTCCGCAATGGGCGAAAGCCTGACGGAGCGACGCCGCGTGTATGATGAAGGCCGTGAGGTTG
TAAAGTACTTTTCTTATTGAAGAATAATGATGGGAGGGAATGCCCGTCAGATGACGTTAGGTAAGGAATAAGCCCCGGCT
AATTACGTGCCAGCCGCCGCCGTAACAC
>OTU_160
GATGAACGCTAGCGGCAGGCCTAACACATGCAAGTCGAGGGGTATAATCTAGCTTGCTAGATTAGAGACCGGCGCACGGG
TGCGTAACGCGTATGCAATCTGCCTTGTACAAAGGGATAGCCCAGAGAAATTTGGATTAATACCTTATAGTATGTAAGAG
TGGCATCACTTTTATATTAAAGATTTATCGGTACAAGATGAGCATGCGTCCCATTAGCTAGTTGGTATGGTAACGGCATA
CCAAGGCAACGATGGGTAGGGGTCCTGAGAGGGAGATCCcccACACTGGTACTGAGACACGGACCAGACTCCTACGGGAG
GCAGCAGTGAGGAATATTGGTCAATGGAGGCAACTCTGAACCAGCCATGCCGCGTGCAGGATGACGGTCCTATGGATTGT
AAACTGCTTTTATACAGGAAGAAACCCTATCACGTGTGATAGATTGACGGTACTGTAAGAATAAGGATCGGCTAACTCCG
TGCCAGCCGCCGCCGTAACAC
>OTU_161
AACGAACGCTGGCGGCAGGCTTAACACATGCAAGTCGAGCGAGGCTTTGGCCTAGCGGCGGACGGGTGAGTAATGCTTGC
GGATGTACCCCATGGTAAGGGATAACGTTTGGAAACGGACGCTAATACCTTATACGCACTACGGTGGAAAGATTTATCGC
TGTGGGATCATTCCAAGTCAGATTAGCTAGTTGTAGGGGTAATGGCTCTACAAGGCGATGATCTGTAGCCGGCCTGAGAG
GGTGATCGGCCACACCGGGACTGAGACACGGCCCGGACTCCTACGGGAGGCAGCAGTGGGGAATATTGGACAATGGGCGC
AAGCCTGATCCAGCCATGCCGCGTGCGTGAAGAAGGCCTTAGGGTTGTAAAGCGCTTTTGTCAGGGAAGATAATGACTGT
ACCTGAAGAATAAGCCCCGGCTAACTCCGTGCCAGCCGCCGCCGTAACAC
>OTU_162
ATTGAACGCTGGCGGCGTGCCTAACACATGCAAGTCGAACGCGAAAGTTTCTTCGGAAATGAGTAGAGTGGCGCACGGGT
GAGTAACGCGTGGATTATCTACCTACTGGTACGGGACAACAGTTGGAAACGACTGCTAATACCGTATACGCTGGTAACGG
GAAAGGgggCCTCTTCTTGAAAGCTCTCGCCAGTAGATGAGTCCGCGTTTCATTAGCTAGACGGTGGGGTAACGGCCTAC
CGTGGCAACGATGAATAGCAGGCCTGAGAGGGTGGCCTGCCACACTGGGACTGGAACACGGCCCAGACTCCTACGGGAGG
CAGCAGTGGGGAATATTGCGCAATGGACGAAAGTCTGACGCAGCGACGCCGCGTGGAGGATGAAGGTTTTCGGATCGTAA
ACTCCTGTCAAGAGGGAAGAAACCTATCATAAATAATACTTATGGTAATTGACGGTACCTCTAGAGGAAGCACCGGCTAA
TTCAGTGCCAGCCGCCGCCGTAACAC
>OTU_163
AACGAACGCTGGCGGCAGGCTTAACACATGCAAGTCGAGCGAAGACTTCGGTCTTAGCGGCGGACGGGTGAGTAACGCGT
GGGAACGTGCCTTTCACTACGGAATAGTCCCGGGAAACTGGGTTTAATACCGTATACGCCCTTCGGgggAAAGAATTTCG
GTGAgagaTCGGCCCGCGTCTGATTAGGTAGTTGGTGGGGTAATGGCCTACCAAGCCGACGATCAGTAGCTGGTTTGAGA
GGATGATCAGCCACACTGGGACTGAGACACGGCCCAGACTCCTACGGGAGGCAGCAGTGAGGAATCTTGGACAATGGggg
CAACCCTGATCCAGCCATGCCGCGTGAACGATGAAGGCCTTAGGGTTGTAAAGTTCTTTCAACGGTGAAGATAATGACGG
TAGCCGTAGAAGAAACCCCGGCTAACTCCGTGCCAGCCGCCGCCGTAACAC
>OTU_164
GGCTAACGCTGGCGGCgcgcCTAACACATGCAAGTCGAACGAGGCTCTTTTGGTTTACTAGAAGATGTCCTAGTGGCAGA
CGGGTGAGTAACGCGTGAGCAATGTGCCTTttttCTGGGGATACCGTTTGGAAACGAACGTTAATACCGAATGTGGTGGT
ACTGGGGCATCTCAGTATCATTAAACTGTTAGGGAgagaAGAGCAGCTCGCGTACTATCAGCTAGATGGTGGGGTAACGG
CCTACCATGGCGACGACGGTTAACTGGTCTGAGAGGATGATCAGTCACACTGGAACTGAGACACGGTCCAGACTCCTACG
GGAGGCAGCAGTGAGGAATCTTGCACAATGGGCGAAAGCCTGATGCAGCGACGCCGCGTGAGGGACGACGGCCTTCGGGT
TGTAAACCTCTGTCAGTAGGGAAGAAGTATGACGGTACCTACTGAGGAAGCTTCGGCTAACTACGTGCCAGCCGCCGCCG
TAACAC
>OTU_165
GATGAACGCTAGCGGCAGGCTTAACACATGCAAGTCGAGGGGTAACAGGAGAAAGCTTGCTTttttGCTGACGACCGGCG
AACGGGTGCGTAACGCGTATAGAATCTGCCTTGTACAGGAGGATAGCCTTTAGAAATGAAGATTAATACTCCATAATATT
GGGAAGTGGCATCACTATCTAATTAAACATTTATGGGTACAAGATGACTATGCGTCCTATTAGCTAGATGGTAAGGTAAC
GGCTTACCATGGCAACGATAGGTAGGgggTCTGAGAGGATTATCCcccACACTGGTACTGAGACACGGACCAGACTCCTA
CGGGAGGCAGCAGTGAGGAATATTGGTCAATGGAGGCAACTCTGAACCAGCCATGCCGCGTGCAGGAAGACTGCCCTATG
GGTTGTAAACTGCTTTTATACAGGAAGAAACAGTCGTACGTGTACGGCCTTGACGGTACTGTAAGAATAAGCACCGGCTA
ACTCCGTGCCAGCCGCCGCCGTAACAC
>OTU_166
GATGAACGCTAGCGGGAGGCTTAATACATGCAAGTCGAACGGTAACAGCGGAGCTTGCTCCGGCTGACGAGTGGCGCACG
GGTGAGTAACGCGTACACAATCTACCCATTACAGGAGGATAGCCTTGGGAAACTGAGAATAATACTCCATAGTCTTTGCG
GCTCGCATGAGTTGCTTAGTAAAGTTCCGGCGGTAATGGATGAGTGTGCGTACTATTAGATAGTTGGTGAGGTAACGGCT
CACCAAGTCAACGATAGTTAGGgggCGTGAGAGCGTGGACCcccACACGGGTACTGAGACACGGACCCGACTCCTACGGG
AGGCAGCAGTAAGGAATATTGGACAATGGGCGCAAGCCTGATCCAGCCATCCCGCGTGGAGGATGACGGCCCTATGGGTT
GTAAACTCCTTTTATAGAGGACGAACCGTACTATTTTAATAGTGCCTGACGGTACTCTACGAATAAGCACCGGCTAATTC
CGTGCCAGCCGCCGCCGTAACAC
>OTU_167
GATGAACGCTAGCGAGACGCCTAACACATGCAAGTCGAATGCTTCGGCATGGCAAACGGGTGCGTAACACGTGCTTAACC
TGCCCTTTGGTAGGGGATACCTGTAGAAATACAACTAATCCCCTATAAGTTCCTCAAAATGAAAATATGAGGAAGAAAGG
TTTACCGCCAAAGGAGGggggCGCGGTCTATTAGCTTGTTGGTGAGGTAACGGCTCACCAAGGCAATGATGGATAGCTGG
TCTGAGAGGATGATCAGCCACAATGGAACTGAGACACGGTCCATACCCCTACGGggggCAGCAGTGGGGAATATTGCACA
ATGGAGGAAACTCTGATGCAGCGATCTCGCGTGAAGGATGAAGCATTACGGTgtgtAAACTTCTTTTCTGGAGGAAGACG
ACTGACTGTACTCCAGGAATAAGGGACGGCTAACTACGTGCCAGCCGCCGCCGTAACAC
>OTU_168
AATGAACGTTGGCGGCATGGATTAGGCATGCAAGTCGAGCGAGAAGTCTTttttGCTTGCATTAAAGACGGACAGCGGCG
AAAGGGAGAGTAACGCGTAGAAATGTACCCCAAGGTCTGGGATAGCGGCGGGAAACTGCCAGTAATACCAGATAATGTCT
CCGGACCAAAGTTtttCGCCTTGGGAGCAGTCTGCGTACTATTAGCTTGTTGGTGGGGTAAAGGCCTACCAAGGCTTAGA
TGGTTAGCGGGCGTGAGAGCGTGGCCCGTCTCACTGGGACTGAGACACTGCCCAGACGTCTACGGACGGCTGCAGTCGAG
AATCTTCCGCAATGGGCGAAAGCCTGACGGAGCAATGCCGCGTGGTGGATGAAGGCCCTCGGGTTGTAAACACCTGTCAG
TAGGAAGGAAATTTTGACCGATCTACAGAGGAAGTCCGGGCTAAGTACGTGCCAGCCGCCGCCGTAACAC
>OTU_169
AACGAACGCTGGCGGCAGGCCTAACACATGCAAGTCGAGCGAGACCTTCGGGTCTAGCGGCGGACGGGTGAGTAACGCGT
GGGAACGTGCCCTTCTCTACGGAATAGTCCCGGGAAACTGGGTTTAATACCGTATACGCCCTTCGGgggAAAGATTTATC
GGAGAAGGATCGGCCCGCGTTGGATTAGGTAGTTGGTGAGGTAACGGCTCACCAAGCCGACGATCCATAGCTGGTTTGAG
AGGATGATCAGCCACACTGGGACTGAGACACGGCCCAGACTCCTACGGGAGGCAGCAGTGGGGAATCTTAGACAATGGgg
gAAACCCTGATCTAGCCATGCCGCGTGAGTGACGAAGGCCCTAGGGTCGTAAAGCTCTTTCGCCAGGGAAGATAATGACG
GTACCTGGTAAAGAAACCCCGGCTAACTCCGTGCCAGCCGCCGCCGTAACAC
>OTU_170
GATGAACGCTAGCGGCAGGCCTAACACATGCAAGTCGAGGGGTAACATAGAGTGCTTGCACTTTGATGACGACCGGCGCA
CGGGTGCGCAACGCGTATAGAACCTACCCTGTACAGGgggATAGCCCGGAGAAATCCGGATTAATACCCCGTGGTAATAT
AGAGTGGCATCGCTTTATATTTAAAGTTtttAATGGTACGGGATGGCTATGCGTCCTATTAGTTAGATGGTGAGGTAACG
GCTCACCATGGCATCGATAGGTAGGGGCCCTGAGAGGgggATCCcccACACTGGTACTGAGACACGGACCAGACTCCTAC
GGGAGGCAGCAGTGAGGAATATTGGACAATGGGCGGAAGCCTGATCCAGCCATGCCGCGTGCAGGAAGACGGCCCTACGG
GTTGTAAACTGCTTTTATACGGGAAGAATAACCACGACGTGTCGTGAGATGACGGTACCGTAAGAATAAGGACCGGCTAA
CTCCGTGCCAGCCGCCGCCGTAACAC
>OTU_171
AGTGAACGCTAGTGGCGTGCTTAACACATGCAAGTCGAACGGACGATATTTGTGCTTGCACAAATAAAGTTAGTGGCAAA
CGGGTGAGTAATACATGAGAATTTTCCTTGCAGTACGGAATAACTATTGGAAACAGTAGCTAATACCGTATATTGCCGAG
AGGTGAAAGATTTATCGCTGCAAGATAAGCCCATGCAAGATTAGCTTGTTGGTAAGGTAATGGCTTACCAAGGCTACGAT
CTTTAGCTGGTTTGAGAGGATGATCAGCCACACTGGAACTTAGACACGGTCCAGACTCCTACGGGAGGCAGCAGTGAGGA
ATATTGGACAATAGGCGAAAGCCTGATCCAGCGACGTCACGTGAATGATGAAGGCCTTAGGGTTGTAAAATTCTTTTAGT
GGAGAAGATAATGACGGTATCCACAGAAaaaGTCCCGGCTAACTTCGTGCCAGCCGCCGCCGTAACAC
>OTU_172
ATTGAACGCTGGCGGCAGGCTTAACACATGCAAGTCGAGCGGTAACAGGGGTAGCTTGCTACCCGCTGACGAGCGGCGGA
CGGGTGAGTAATGCTTAGGAATCTGCCCAGTAGTGGgggATAGCCCGGGGAAACCCGGATTAATACCGCATACGTCCTAC
GGGAGAAAGCAGGGGATCTTCGGACCTTGCGCTATTGGATGAGCCTAAGTCGGATTAGCTAGTTGGTGGGGTAAAGGCCT
ACCAAGGCGACGATCCGTAGCTGGTCTGAGAGGATGATCAGCCACATCGGGACTGAGACACGGCCCGAACTCCTACGGGA
GGCAGCAGTGGGGAATATTGGACAATGGgggCAACCCTGATCCAGCCATGCCGCGTgtgtgAAGAAGGCTTTCGGGTTGT
AAAGCACTTTCAGTAGGGAGGAAAACCTTATGGCTAATACCCATGAGGCTTGACGTTACCTACAGAAGAAGCACCGGCTA
ACTCCGTGCCAGCCGCCGCCGTAACAC
>OTU_173
GATGAACGCTAGCGGCAGGCTTAACACATGCAAGTCGAGGGGTAACAGGGAAAAGCTTGCTTTTCCGCTGACGACCGGCG
AACGGGTGCGTAACACGTATGCAACCTACCTCTATCAGGAGGATAGCCCAGAGAAATCTGGATTAATACTCCATAGTATC
ATTCTTTCGCATGTTAGAATGATTAAAGCTCCGGCGGATAGAGATGGGCATGCGTCCCATTAGCTAGTTGGTGAGGTAAC
GGCTCACCAAGGCAACGATGGGTAGGGGTTCTGAGAGGATGATCCcccACACTGGTACTGAGACACGGACCAGACTCCTA
CGGGAGGCAGCAGTGAGGAATATTGGTCAATGGACGAAAGTCTGAACCAGCCATGCCGCGTGCAGGATGACTGCCCTATG
GGTTGTAAACTGCTTTTAtataCCAAGAAACCCCTGGACGTGTCCGGGGCTGACGGTAGTATATGAATAAGCACCGGCTA
ACTCCGTGCCAGCCGCCGCCGTAACAC
>OTU_174
GATGAACGCTAGCGGCAGGCCTAACACATGCAAGTCGAACGGTAACAGGAAaaaGCTTGCTTttttGCTGACGAGTGGCG
CACGGGTGCGTAACGCGTATACAATCTGCCTTTTACTGGgggATAGCCTTTGGAAACGAAGAATAATACCCCATAGTATC
TAAATTTCGCATGTTATTTAGATTAAAGCTTCGGCGGTAAGAGATGAGTATGCGTTCTATTAGCTAGATGGTGTGGTAAC
GGCACACCATGGCAACGATAGATAGGGGCCCTGAGAGGgggATCCcccACACTGGTACTGAGACACGGACCAGACTCCTA
CGGGAGGCAGCAGTGAGGAATATTGGACAATGGGCGAAAGCCTGATCCAGCCATGCCGCGTGCAGGAAGACTGCCCTATG
GGTTGTAAACTGCTTTTATACGGGAAGAAACCCACCTACGTGTAGGTGGCTGACGGTACCGTAAGAATAAGCATCGGCTA
ACTCCGTGCCAGCCGCCGCCGTAACAC
>OTU_175
GATGAACGCTAGCGGCAGGCCTAACACATGCAAGTCGAGGGGTAACAGGgggTGCTTGCACCCCGCTGACGACCGGCGCA
CGGGTGCGGAACGCGTATGGAACCTGCCCCTGTCAGGGGAATAGCCCAGAGAAATTTGGATTAATGCCCCATGGTAACAC
GGTATCGCATGATATCGTGTTTAAAGATTTATCGGACAGGGATGGCCATGCGTACCATTAGTTAGTTGGTGAGGTAACGG
CTCACCAAGACAGCGATGGTTAGGGGCCCTGAGAGGgggATCCcccACACTGGTACTGAGACACGGACCAGACTCCTACG
GGAGGCAGCAGTGAGGAATATTGGACAATGGCCGAAAGGTTGATCCAGCCATGCCGCGTGCAGGATGACTGCCCTATGGG
TTGTAAACTGCTTTTACACGGGAAGAAACCTCCCCTCGTGAGGGGAGCTGACGGTACCGTGAGAATAAGGACCGGCTAAC
TCCGTGCCAGCCGCCGCCGTAACAC
>OTU_176
GATGAACGCTAGCGGCAGGCTTAACACATGCAAGTCGAACGGTAACATTTCTTGCTTGCAAGAAGATGACGAGTGGCGCA
CGGGTGCGTAACGCGTATACAACCTGCCTTCAACAAAGGGATAGCCCATGGAAACGTGGATTAATACCTTATAATatata
GAGATGGCATCATCATTATATCAAAGATTTATCGGTTGAAGAGGGGTATGCGTGACATTAGCTAGTTGGTAAGGTAACGG
CTTACCAAGGCAACGATGTCTAGGGGTTCTGAGAGGATGATCCcccACACTGGTACTGAGACACGGACCAGACTCCTACG
GGAGGCAGCAGTGAGGAATATTGCGCAATGGAGGAAACTCTGACGCAGCCATGCCGCGTGAAGGAATGAATGCCCTATGG
GTTGTAAACTTCTTTTATGTAGGAAGAAACGCAGATACGTGTATCTGTTTGACGGTACTACACGAATAAGGACCGGCTAA
CTCCGTGCCAGCCGCCGCCGTAACAC
>OTU_177
ATTGAACGCTGGCGGCGTGGCTAAAACATGCAAGTCGAACGGAAAGGCTTtttATGATGCTTCGGTTGATTAAaaaGTAC
TCGAGTGGCGAAAGGGCGAGGAATatataGATAACATACCTTTGGCTAAGGGATAGCTGCGGGAAACTGCAGGTAATACC
TTATAAGACCACGGCATCTACGGGTGCTGCGGTCAAAGGAGCGGGCTTCGGTGCTCCGGCTAATGAGTGGTCTATATCCT
ATCAGGTAGTTGGTGAGGTAATGGCTCACCAAGCCTACGACGGGTACCGGGACTGAGAGGTTGATCCGGCGCATTGGGAC
TGAGACACTGCCCAGACTCCTACGGGAGGCTGCAGTAACGAATATTGGACAATGAACGAAAGTTTGATCCAGCGACGCCG
CGTGCAGGACGAAGTCCTTCGGGATGTAAACTGCTGTCAGGGACTACCAAGCGAGTATGAGGAAATGCATATGAGTTGAG
GAATCCCAGAGGAAGCCACGGCTAACTTCGTGCCAGCCGCCGCCGTAACAC
>OTU_178
ATTGAACGCTGGCGGCATGCCTTACACATGCAAGTCGAACGGTAACAGGTCTTCGGATGCTGACGAGTGGCGAACGGGTG
AGTAATACATCGGAACGTGCCCAGTAATGGgggATAGCTCGGCGAAAGCCGGATTAATACCGCATACGCCCTGAGGgggA
AAGTGGgggACCGCAAGGCCTCACGTTATTGGAGCGGCCGATGGCTGATTAGCTAGTTGGTAGGGTAAAGGCCTACCAAG
GCGACGATCAGTAGCTGGTCTGAGAGGACGATCAGCCACACTGGGACTGAGACACGGCCCAGACTCCTACGGGAGGCAGC
AGTGGGGAATTTTGGACAATGGgggAAACCCTGATCCAGCAATGCCGCGTGTGCGAAGAAGGCCTTCGGGTTGTAAAGCA
CTTTTGTCAGGGAAGAAATCCTTTGGGCTAATACCCTAGGgggATGACGGTACCTGAAGAATAAGCACCGGCTAACTACG
TGCCAGCCGCCGCCGTAACAC
>OTU_179
ATTGAACGCTGGCGGCATGCTTAACACATGCAAGTCGAACGGAAACGATGGAAGCTTGCTTCCAGGCGTCGAGTGGCGGA
CGGGTGAGTAACACGTGGGAATCTGCCTTTTAGTGGgggATAACGTACCGAAAGGTACGCTAATACCGCATAATCTCTAC
GGAGGAAAGCTGGGGATCTTCGGACCTGGCGCTGAAAGATGAGCCCGCGTCGGATTAGCTTGTTGGTGGGGTAACGGCCT
ACCAAGGCGACGATCCGTAGCTGGTCTGAGAGGATGATCAGCCACACTGGGACTGAGACACGGCCCAGACTCCTACGGGA
GGCAGCAGTGGGGAATATTGGACAATGGGCGCAAGCCTGATCCAGCAATGCCGCGTgtgtgAAGAAGGCCTGAGGGTTGT
AAAGCACTTTTATGTCGAAAGAAAGGTGGTTAGTTAATAGCTAGCTATTTTGACGGTACGACAGGAATAAGCACCGGCTA
ACTCCGTGCCAGCCGCCGCCGTAACAC
>OTU_180
AATGAACGTTGGCGGCGTGGATTAGGCATGCAAGTCGAGCGAGAAATCTGTGAATGATCCTTCGGGTGATTGATCAGATG
GAAAGCGGCAAACGGCGTAGTAATGCGTAGGTTACGTACCCTCAGGTCGGGAATAGCCATGGGAAACTGTGGGTAATGCC
CGATAATCTCTGTGGAGCAAAGGTGAGATTCCGCCTGAGGAGCGGCTTACGTGATATTAGCTTGCTGGTGGGGTAATGGC
CTACCAGGGCAACGATGTCTAGGgggTGTGAGAGCATGGCCcccACGACCGGAACTGAGATACTGTCCGGACACCTACGG
GTGGCTGCAGTCGAGAATCTTCCGCAATGGACGAAAGTCTGACGGAGCGACGCCGCGTGCAGGATGAAGGCCCTTGGGTT
GTAAACTGCTGTCAGAGGGGATGAAATCATGGTTGGCTATCCTTCCATGTTGACAGAGCCTCAGAGGAAGCACGGGCTAA
GTACGTGCCAGCCGCCGCCGTAACAC
>OTU_181
ATTGAACGCTGGCGGTATGCTTAACACATGCAAGTCGAACGGTAACAGAGGAAAGCTTGCTTTCTTGCTGACGAGTGGCG
GACGGGTGAGTAACGCGTGGGAATCTACCTAGTAGCGGgggATAGCCAGGAGAAATTCTGATTAATACCGCATACGCCCT
ATGGgggAAAGAGGCCCTCTTCTTGAAAGGTCTCACTATTAGATGAGCCCGCGTTAGATTAGCTAGATGGTGAGGTAAGA
GCTCACCATGGCAACGATCTATAGCTGGTCTGAGAGGATGATCAGCCACATTGGGACTGAGACACGGCCCAGACTCCTAC
GGGAGGCAGCAGTGGGGAATATTGGACAATGGGCGCAAGCCTGATCCAGCAATACCGCGTgtgtgAAGAAGGCCTTAGGG
TTGTAAAGCACTTTTATGAGTGAAGAAGGCTTAGTAGTTAATACCTGCTGAGATTGACGGTAGCTCACGAATAAGCACCG
GCTAACTCCGTGCCAGCCGCCGCCGTAACAC
>OTU_182
ATTGAACGCTGGCGGCATGCTTAACACATGCAAGTCGAACGGTAACAGCATTGGTGCTTGCACTAATGGCTGACGAGTGG
CGGACGGGTGAGTAACGCGTAGGAATCTGCCCTGTAGCGGgggATAACCCGGGGAAACTCGGGCTAATACCGCATACGCT
CTATGGAGGAAAGCGTGGGACCTTTTGGCCACGCACTATGGGATGAGCCTGCGTTAGATTAGCTAGTTGGTAGGGTAAAG
GCTTACCAAGGCGACGATCTATAGCTGGTCTGAGAGGATGAGCAGCCACACTGGGACTGAGACACGGCCCAGACTCCTAC
GGGAGGCAGCAGTGGGGAATATTGGACAATGGgggCAACCCTGATCCAGCAATGCCGCGTgtgtgAAGAAGGCCTACGGG
TTGTAAAGCACTTTCGGCGGGGAGGAAGGCTTATTGGTTAATAGCTAATGAGATTGACGTTACCCGCAAAAGCAGCACCG
GCTAACTCTGTGCCAGCCGCCGCCGTAACAC
>OTU_183
GATGAACGCTGGCGGCATGCCTAACACATGCAAGTCGAACGAGAAGTTTAGAGAAGACGATTTATCTGATTCTCTAAACG
GAAAGTGGCGGACGGGTGAGTAACGCGTGAGTAACCTACCTCATACAGAGGGATAGCCCCGGGAAACTGGGTGTAATACC
TCATAAGACTACGCTACCGCATGGTAAAGTAGTAAaaaCTCCGGTGGTATGAGATGGACTCGCGTCTGATTAGCTAGTAG
GTAAGGTAACGGCTTACCTAGGCGACGATCAGTAGCCGGCCTGAGAGGGCGGACGGCCACACTGGAACTGAgagaCGGTC
CAGACTCCTACGGGAGGCAGCAGTGGGGAATATTGCACAATGGgggAAACCCTGATGCAGCAATGCCGCGTGAAGGATGA
AGGTTTTCGGATTGTAAACTTCTTTCGCTGGGGAAGAAACAAATGACGGTACCCAGATAAGAAGCCCCGGCTAACTATGT
GCCAGCCGCCGCCGTAACAC
>OTU_184
AACGAACGCTGGCGGTAGGCCTAACACATGCAAGTCGAGCGATCTCTTCGGAGATAGCGGCGGACGGGTGAGTAACGCGT
GGGAACATGCCCAGAGGTACGGAACAACAGTTGGAAACGACTGCTAATACCGTATACGCCCTACGGgggAAAGAATTTCG
CCTTTGGATTGGCCCGCGTTGGATTAGATAGTTGGTGGGGTAATGGCCTACCAAGTCGACGATCCATAGCTGGTTTGAGA
GGATGATCAGCCACACTGGGACTGAGACACGGCCCAGACTCCTACGGGAGGCAGCAGTGGGGAATCTTAGACAATGGGCG
CAAGCCTGATCTAGCCATACCGCGTGAGTGATGAAGGCCCTAGGGTCGTAAAGCTCTTTCGCCAGGGAAGATAATGACTG
TACCTGGTAAAGAAGTCCCGGCTAACTCCGTGCCAGCCGCCGCCGTAACAC
>OTU_185
ATTGAACGCTGGCGGCATGCCTTACACATGCAAGTCGAACGGCAGCATAGGAGCTTGCTCCTGATGGCGAGTGGCGAACG
GGTGAGTAATatatCGGAACGTGCCCTAGAGTGGgggATAACTAGTCGAAAGACTAGCTAATACCGCATACGATCTACGG
ATGAAAGTGGgggATCGCAAGACCTCATGCTCCTGGAGCGGCCGATATCTGATTAGCTAGTTGGTGGGGTAAAAGCCTAC
CAAGGCAACGATCAGTAGCTGGTCTGAGAGGACGACCAGCCACACTGGGACTGAGACACGGCCCAGACTCCTACGGGAGG
CAGCAGTGGGGAATTTTGGACAATGGgggCAACCCTGATCCAGCAATGCCGCGTGAGTGAAGAAGGCCTTCGGGTTGTAA
AGCTCTTTTGTCAGGGAAGAAACGGTGGTGGCGAATAACTACTACTAATGACGGTACCTGAAGAATAAGCACCGGCTAAC
TACGTGCCAGCCGCCGCCGTAACAC
>OTU_186
ATTGAACGCTGGCGGTATGCTTAACACATGCAAGTCGAACGGCAGCATAAGagagCTTGCTctctTGATGGCGAGTGGCG
GACGGGTGAGTAACGCGTAGGAATCTGCCTTAAAGTGGgggACAACCAGGGGAAACTCTGGCTAATACCGCATACTCCTT
ACGAGGCAAAGTGGGCCTCTTTACAATGCTCACGCTTTAAGATGAGCCTGCGTCCGATTAGCTAGTTGGTGGGGTAAAGG
CCTACCAAGGCGACGATCGGTAGCTGGTCTGAGAGGACGATCAGCCACACTGGGACTGAGACACGGCCCAGACTCCTACG
GGAGGCAGCAGTGGGGAATATTGGACAATGGgggCAACCCTGATCCAGCAATACCGCGTgtgtgAAGAAGGCCTGCGGGT
TGTAAAGCACTTTCAGTAGGGAGGAGATGTTGATGATTAATACTCATCAGCGGAGACGTTACCTACAGAAGAAGCACCGG
CTAACTCTGTGCCAGCCGCCGCCGTAACAC
>OTU_187
AACGAACGCTGGCGGCgcgcCTAACACATGCAAGTCGAGCGATTAAAGCCCTTTCGGgggTGTATAAAGCGGCGGACGGG
TGAGTAAGGCATAGGTGACCTGCCCTAAAATGGgggATAGCCTGGGGAAACTCGGGTTAATACCGCGTAAGCTATCCAAG
TGAATATTGGCTAGTAAAGGCTTCGGTCGTTTTAGGATGGGCCTATGTATGATTAGCTAGTTGGTGAGGTAACGGCTCAC
CAAAGCTTCGATCATTAGCTGGTCTGAGAGGATGATCAGTCACACTGGAACTGAGACACGGTCCAGACTCCTACGGGAGG
CAGCAGTGAGGAATTTTGCGCAATGGgggCAACCCTGACGCAGCGACGCCGCGTGGAGGACGAAGTCTTTCGAGATGTAA
ACTCCTGTCAGTGGGGATGATAATGACAGTACCCACAGAGGAAGCACCGGCTAACTCCGTGCCAGCCGCCGCCGTAACAC
>OTU_188
AATGAACGCTGGCGGCGTGCTTTAGACATGCAAGTCGAACGCGAACGCGACCTTCGGGTCGCTAGTAGAGTGGCGAACGG
GTGAGTAACACGTGGACAATCTGCCTCAGAGTGGGGAACAACTTGGGGAAACCTAAGCTAATACCGCATACGTTTCACCG
GCTTCGGTCGGTGTCAGAAAGATGGCCTATCCTTGGAAGCTGTCGCTCTGAGAGGAGTCCGCGCTCGATTAGCTAGTTGG
TGGGGTAACGGCCTACCAAGGCAACGATCGATAGCCGGCCTGAGAGGGTGATCGGCCACACTGGAACTGAGACACGGTCC
AGACTCCTACGGGAGGCAGCAGTCGGGAATATTGCGCAATGGGCGAAAGCCTGACGCAGCAACGCCGCGTGAAGGATGAA
GGCCCTCGGGTCGTAAACTTCTGTCAGGTGGAAAGAACGTTCGTCGGTTAATACCCGGCGAGCTTGACGGTACCACCAGA
GGAAGCCCCGGCTAACTCCGTGCCAGCCGCCGCCGTAACAC
>OTU_189
GATGAACGCTAGCGGCAGGCTTAACACATGCAAGTCGAGGGGTAACGATTGGATAGTTTACTATCTAAGGCGACGACCGG
CGCACGGGTGAGTAACGCGTATGCAACCTACCTTTAACAGGgggATAGCCCAGAGAAATCTGGATTAATACCCCATAGTA
TTTATTGATTGCATGATCGATAAATTAAAACTCCGGTGGTTAAAGATGGGCATGCGTGACATTAGTTAGTTGGTGAGGTA
ACGGCTCACCAAGGCGACGATGTCTAGGGGTTCTGAGAGGATTGTCCcccACACTGGTACTGAGACACGGACCAGACTCC
TACGGGAGGCAGCAGTGAGGAATATTGGTCAATGGGCGCGAGCCTGAACCAGCCATGCCGCGTGCAGGAAGACTGCCCTA
TGGGTTGTAAACTGCTTTTCTACAGGAAGAAACCTATCCTCGTGAGGGTAGCTGCCGGTACTGTAGGAATAAGCACCGGC
TAACTCCGTGCCAGCCGCCGCCGTAACAC
>OTU_190
AATGAACGTTGGCGGCGTGGATTAGGCATGCAAGTCGTGCGGAAAGGCCCTAGCTTGCTAGGGCACTCGAGCGGCGAAAG
GGAGAGTAACGCGTGGGTACCTGCCTCTAGACCCGGGATAGCCCCGAGAAATTGGgggTAATACCGGATAATGTTTCCGA
ACCAAAGGTGTGATTCCGTCTAGAGATGGGCCCGCGTCCTATTAGCCAGTTGGTGGGGTAATGGCCTACCAAAGCTGAGA
TGGGTACCGGGTGTGAGAGCATGGCCCGGCTCACTGGGACTGAGACACTGCCCAGACACCTACGGGTGGCTGCAGTCGAG
AATCTTCGGCAATGGGCGCAAGCCTGACCGAGCGACGCCGCGTGCGGGATGAAGGCCTTCGGGTTGTAAACCGCTGTCAG
AGGGAAGGAAATGTTAGAAGGCTATCCTTCTAATTTGACCGATCCTCAGAGGAAGGACGGGCTAAGTTCGTGCCAGCCGC
CGCCGTAACAC
>OTU_191
AACGAACGTTGGCGGCGTGGATTAGGCATGCAAGTCGTACGAGAAAGTCACCTTCGGGTGGCGAGTACAGTGGCGAACGG
GTGAGTAACGCGTGGGAAACCTGCCTTTTAGTTGGGGACAACAGTCCTAACGGACTGCTAATACCGAATGTGGAGACGAA
GTCACATGTCTTTGTCTCTAAAGATGGCCTCTCCTTGGAAGCTATCGCTAGAAGATGGTCCCGCGTCCTATTAGCTTGTT
GGTGAGGTAACGGCTCACCAAGGCTCCGATAGGTAGCTGGTCTGAGAGGATGGTCAGCCACACTGGGACTGAGATACGGC
CCAGACTCCTACGGGAGGCAGCAGTCGAGAGGCTTCGGCAATGGgggCAACCCTGACCGAGCGACGCCGCGTGGGCGATG
AAGGTTGTAAGATCGTAAAGCCCTGTCAGGAGGGAAGAAGTgtgtCTATTCAAACAGGGTAGGCATTTGACGGTACCTCC
AAAGGAAGCTCCGGCTAACTCCGTGCCAGCCGCCGCCGTAACAC
>OTU_192
GATGAACGCTGGCGGCGTGCTTAACACATGCAAGTCGAGCGAGAAGTTtttAGATGAACCTTCGGGTGAATCTGAAAATG
GAAAGCGGCGGACGGGTGAGTAACACGTGGGTAACCTGCCCTATGCAGGgggATAACGCACTGAAAAGTGTGCTAATACC
GCATAAGACCACAGCATTGCATGATGCAGTGGTAAaaaCTCCGGTGGCATAGGATGGACCCGCGTCTGATTAGCTAGTTG
GTAAGGTAACGGCTTACCAAGGCGACGATCAGTAGCCGACCTGAGAGGGTGATCGGCCACATTGGGACTGAGACACGGCC
CAAACTCCTACGGGAGGCAGCAGTGGGGAATATTGCACAATGGgggAAACCCTGATGCAGCGACGCCGCGTGAAGGAAGA
AGGTTTTCGGATCGTAAACTTCTATCAGCAGGGAAGATAATGACAGTACCTGACTAAGAAGCCCCGGCTAACTACGTGCC
AGCCGCCGCCGTAACAC
>OTU_193
GATGAACGCTAGCGGCAGGCTTAACACATGCAAGTCGAGGGGTAACAGGGGAAAGCTTGCTTttttGCTGACGACCGGCG
CACGGGTGCGTAACGCGTATACAATCTACCTCTTACTGAGGGATAGCCCAGAGAAATTTGGATTAACACCTCATAGTATG
TTAGAGTGGCATCACTTTAATATTAAAGGTTACGGTAAGAGATGAGTATGCGTTCTATTAGCTAGTAGGTATGGTAACGG
CATACCTAGGCGACGATAGATAGGGGCCCTGAGAGGgggATCCcccACACTGGTACTGAGACACGGACCAGACTCCTACG
GGAGGCAGCAGTGAGGAATATTGGTCAATGGGCGCAAGCCTGAACCAGCCATGCCGCGTGCAGGAAGACTGCCCTATGGG
TTGTAAACTGCTTTTATACAGGAAGAAACACTCGGACGTGTCCGAGCTTGACGGTACTGTAAGAATAAGGATCGGCTAAC
TCCGTGCCAGCCGCCGCCGTAACAC
>OTU_194
GATGAACGCTGGCGAGATGCCTTACACATGCAAGTCGTACGAGAGTTtttAACTCAAGTGGCGGACGGGTGAGTAACACG
TAAGAATTTGCCTTTAGGAGGgggACAACAACTGGAAACGGTTGCTAATACCCCATATGCTTTCGAGTGAAATGGATTTT
CCGCCTAGagagaAGCTTGCGGCTGATTAGCTTGTTGGTGAGGTAATGGCTCACCAAGGCGACGATCAGTATCTGGTTTG
AGAGGACGATCAGACacacTGGAACTGAGACACGGTCCAGACTCCTACGGGAGGCAGCAGTGGGGAATTTTCCGCAATGG
GCGAAAGCCTGACGGAGCAATCTCGCGTGAGGGATGACGGCCTATGGGTTGTAAACCTCTTttttCAGGGAGGAATAAAT
GACGTGTACCTGAAGAATAAGCATCGGCTAACTCCGTGCCAGCCGCCGCCGTAACAC
>OTU_195
GATGAACGCTAGCGGCAGGCTTAACACATGCAAGTCGAGGGGTAACAGGAAaaaGCTTGCTTtttCGCTGACGACCGGCG
CACGGGTGCGTAACGCGTATAGAACCTACCTTTTACTGAGGGATAGCCTTTAGAAATGAAGATTAATACCTCATAGTATC
AAATTtttGCATGATTATTTGATTAAAGATTTATTGGTAAAAGATGGCTATGCGTCCTATTAGCTAGATGGTAAGGTAAC
GGCTTACCATGGCAACGATAGGTAGGGGTCCTGAGAGGGAGATCCcccACACTGGTACTGAGACACGGACCAGACTCCTA
CGGGAGGCAGCAGTGAGGAATATTGGGCAATGGAGGCAACTCTGACCCAGCCATGCCGCGTGCAGGAAGACTGCCCTATG
GGTTGTAAACTGCTTTTATACAGGAAGAAACACTCCCTCGTGAGGGAGCTTGACGGTACTGTAAGAATAAGCACCGGCTA
ACTCCGTGCCAGCCGCCGCCGTAACAC
>OTU_196
AACGAACGCTGGCGGCAGGCTTAACACATGCAAGTCGAACGGGCTCTTCGGAGCTAGTGGCAGACGGGTGAGTAACGCGT
GGGAACCTACCTATAAGTACGGAACAACACAGAGAAATTTGTGCTAATACCGTATGTGCTCTTTGGAGTAAAGATTTATC
GCTTATAGATGGGCCCGCGTTAGATTAGCTAGTTGGTGAGGTAATGGCTCACCAAGGCGACGATCTATAGCTGGTCTGAG
AGGATGATCAGCCACACTGGGACTGAGACACGGCCCAGACTCCTACGGGAGGCAGCAGTGAGGAATATTGGACAATGGgg
gCAACCCTGATCCAGCCATGCCGCGTGAGTGATGACGGCCTTAGGGTTGTAAAGCTCTTTCGCTAGGGAAGATAATGACG
GTACCTAGTAAAGAAGCCCCGGCTAACTTCGTGCCAGCCGCCGCCGTAACAC
>OTU_197
GATGAACGCTGGCGGCGTGCCTAATACATGCAAGTCGAGCGAACAGACGAGGAGCTTGCTCCTTTGACGTTAGCGGCGGA
CGGGTGAGTAACACGTGGGTAACCTACCTATAAGACTGGGATAACTTCGGGAAACCGGAGCTAATACCGGATAATATTTC
GAACCGCATGGTTCGATAGTGAAAGATGGCTTTGCTATCACTTATAGATGGACCTGCGCCGTATTAGCTAGTTGGTAAGG
TAACGGCTTACCAAGGCAACGATACGTAGCCGACCTGAGAGGGTGATCGGCCACACTGGAACTGAGACACGGTCCAGACT
CCTACGGGAGGCAGCAGTAGGGAATCTTCCGCAATGGGCGAAAGCCTGACGGAGCAACGCCGCGTGAGTGATGAAGGTCT
TCGGATCGTAAAACTCTGTTATTAGGGAAGAACAAACGTGTAAGTAACTGTGCACGTCTTGACGGTACCTAATCAGAAAG
CCACGGCTAACTACGTGCCAGCCGCCGCCGTAACAC
>OTU_198
GATGAACGCTGGCGGCGTGCTTAACACATGCAAGTCGAGCGAGAAGTTTATAAAGGAATCTTCGGAAGAATTTATAAATG
GAAAGCGGCGGACGGGTGAGTAACACGTGGGTAACCTACCCTATGCAGGgggATAACGCACTGAAAAGTGTGCTAATACC
GCATAAGACCACACTACCACATGGTAGagagGTAAAAGTTCAGGCAGCATAGGATGGACCCGCGTCTGATTAGCTAGTTG
GTAAGGTAAGGGCTTACCAAGGCGACGATCAGTAGCCGACCTGAGAGGGTGACCGGCCACATTGGGACTGAGACACGGCC
CAAACTCCTACGGGAGGCAGCAGTGGGGAATATTGCACAATGGgggAAACCCTGATGCAGCGACGCCGCGTGAAGGAAGA
AGGTTTTCGGATCGTAAACTTCTATCAGCAGGGAAGATAGTGACAGTACCTGACTAAGAAGCCCCGGCTAACTACGTGCC
AGCCGCCGCCGTAACAC
>OTU_199
GATGAACGCTAGCGGCAGGCCTAACACATGCAAGTAGAACGGTAACAGGAATAGCTTGCTATTCGCTGACGAGTTGCGAA
CGGGTGCGTAACGCGTATGCAACCTACCCCAAACAGGGAGATAGCCTTTCGAAAGGAAGAATAATATCCCATAATATGGT
TGATTGGCATCAATTGACTCTTAAAGCTCCGGCGGTTTGGGATGGGCATGCGTGTCATTAGCTAGTTGGTGCGGTAACGG
CGCACCAAGGCAACGATGACTAGGGGTTCTGAGAGGATTATCCcccACACTGGTACTGAGACACGGACCAGACTCCTACG
GGAGGCAGCAGTGAGGAATATTGGGCAATGGAGGCAACTCTGACCCAGCCATGCCGCGTGCAGGAAGACTGCCCTATGGG
TTGTAAACTGCTTTTATATGGGAAGAATGGTTTCTACGTGTAGAGATTTGACGGTACCATACGAATAAGGATCGGCTAAC
TCCGTGCCAGCCGCCGCCGTAACAC
>OTU_200
AGCGAACGCTGGCGGTATGCTTAACACATGCAAGTCGAGCGAGAAAATGGCTTCGGCCATGAGTACAGCGGCGGACGGGT
GAGTAATACATGGATAATCTGCCTTTAGGACCGGGACAACCCAGGGAAACTTGGGCTAATACCGGATAAGACCACAGAAT
CTCCGGATTCAGCGGTAAAAGGTGGCTTCGGCTATCACCTATAGATGAGTCCATGTCCCATCAGGTAGTTGGTGAGGTAA
CGGCCCACCAAGCCAAAGACGGGTAGCCGACCTTAGCGGGTGATCGGCCACACGGGGACTGAGACACGGCCCCGACTCCT
ACGGGAGGCAGCAGTGGGGAATATTGGACAATGGGCGCAAGCCTGATCCAGCAATACCGCGTGAGGGATGAAGGCTTTCG
AGTCGTAAACCTCTGTCAGTTGGAACGATGGGTCTGTAGGTTAATACCCTGCAGACTTGACGGTACCTTCAAAGGAAGCC
CCGGCTAACTCCGTGCCAGCCGCCGCCGTAACAC
>OTU_201
AACGAACGCTGGCGGCAGGCCTAACACATGCAAGTCGAGCGCACCTTCGGGTGAGCGGCGGACGGGTGAGTAACGCGTGG
GAATATGCCCTTCTCTGCGGAATAGCCACTGGAAACGGTGAGTAATACCGCATACGCCCTTCGGgggAAAGATTTATCGG
AGAAGGATTAGCCCGCGTTAGATTAGGTAGTTGGTGGGGTAATGGCCCACCAAGCCTACGATCTATAGCTGGTTTTAGAG
GATGATCAGCCACACTGGGACTGAGACACGGCCCAGACTCCTACGGGAGGCAGCAGTGAGGAATCTTAGACAATGGGCGC
AAGCCTGATCTAGCCATGCCGCGTGAGTGATGAAGGCCCTAGGGTCGTAAAGCTCTTTCGCCAGAGATGATAATGACAGT
ATCTGGTAAAGAAACCCCGGCTAACTCCGTGCCAGCCGCCGCCGTAACAC
>OTU_202
AACGAACGCTGGCGGCAGGCCTAACACATGCAAGTCGAACGAACCTTTTAGGTGAGTGGCGCACGGGTGCGTAACACGTG
GGAATCTACACTTCGGTAAGGAACAACACAGAGAAATTTGTGCTAATACCTTATAATGACTCCGGTCCAAAGATTTATCG
CCGAAGGATGAGCCCGCGCTAGATTAGTTTGTTGGTGAGGTAAAAGCTCACCAAGACTACGATCTATAGCTGGTCTTAGA
GGATGATCAGCCACACTGGTACTGAGACACGGACCAGACTCCTACGGGAGGCAGCAGTGAGGAATATTGCGCAATGGggg
AAACCCTGACGCAGCCATGCCGCGTGAATGACGAAGGCCCTAGGGTTGTAAAGTTCTTTCAGATGCGAAGATAATGACGG
TAACATCAGAAGAAGCTCCGGCTAAATTCGTGCCAGCCGCCGCCGTAACAC
>OTU_203
AACGAACGCTGGCGGCAGGCCTAACACATGCAAGTCGAGCGCACCTTCGGGTGAGCGGCGGACGGGTTAGTAACGCGTGG
GAATATGCCCAGATCTACGGAATAGCCTCGGGAAACTGAGAGTAATACCGTATACGCCCTTCGGgggAAAGATTTATCGG
ATTTGGATTAGCCCGCGTTGGATTAGGTAGTTGGTGGGGTAATGGCCTACCAAGCCGACGATCCATAGCTGGTTTGAGAG
GATGATCAGCAACACTGGGACTGAGACACGGCCCAGACTCCTACGGGAGGCAGCAGTGGGGAATCTTAGACAATGGgggA
AACCCTGATCTAGCCATGCCGCGTGAGTGATGAAGGCCCTAGGGTCGTAAAGCTCTTTCGCCAGGGATGATAATGACAGT
ACCTGGTAAAGAAACCCCGGCTAACTCCGTGCCAGCCGCCGCCGTAACAC
>OTU_204
AATGAACGTTGGCGGCATGGATTAGGCATGCAAGTCGAGCGAGAAGTTTAAGTTTGACGCTTCGGTTGATTTCTTAAATG
GAAAGCGGCGAAAGGGAGAGTAACGCGTAGTTATTTGCCCCAAGGTCCGGAATAGCTGAGGGAAACTTCAGGTAATGCCG
GATAATATCCCCGGATCAAAGGTGCGATTCCGCCTTGGGAGAAGACTGCGTACTACTAGCTTGTTGGTGGGGTAATGGCC
TACCAAGGCGATGATGGTTAGCGGGCGTGAGAGCGTGGCCCGTCTCACTGGGACTGAGACACTGCCCAGACACCTACGGG
TGGCTGCAGTCGAGAATCTTCGGCAATGGACGAAAGTCTGACCGAGCGATGCCGCGTGCGGGATGAAGGCCCTCGGGTTG
TAAACCGCTGTCAGTTGGGAGGAAGGCTCCGTGAAGAGCGGAGTTTGACCTATCTTCAGAGGAAGTCCGGGCTAAGTTCG
TGCCAGCCGCCGCCGTAACAC
>OTU_205
GATGAACGCTGGCGGCGTGCCTAACACATGCAAGTCGAGCGAGATTCTCATAATTGATTCTTCGGATGATTTTATGAGTT
GACAGCGGCGGACGGGTGAGTAACGCGTAGGTAACCTGCCCCATACATTGGGATAGCCCCGGGAAACTGGGTGTAATACC
GAATAACACTTTGAGATGGCATCATCACAAAGTCAAAACTCCGGTGGTATGGGATGGACCTGCGTCTGATTAGCTAGTTG
GTGAGGTAATGGCTCACCAAGGCAACGATCAGTAGCCGACCTGAGAGGGTGATCGGCCACACTGGAACTGAGACACGGTC
CAGACTCCTACGGGAGGCAGCAGTGGGGAATATTGCACAATGGGCGAAAGCCTGATGCAGCAACGCCGCGTGAGTGATGA
AGGCTTTCGGGTCGTAAAACTCTGTCCTAGAGGAAGAATAATGACGGTACTCTAGGAGGAAGCTCCGGCTAACTACGTGC
CAGCCGCCGCCGTAACAC
>OTU_206
AACGAACGCTGGCGGCAGGCCTAACACATGCAAGTCGAACGCCCTCTTCGGAGGGAGTGGCAGACGGGTGAGTAACGCGT
GGGAACCTACCTAGTAGTACGGAACAACACAGAGAAATTTGTGCTAATACCGTATACGCCCTACGGgggAAAGATTTATC
GCTATTAGATGGGCCCGCGTTGGATTAGCTAGTTGGTGAGGTAACGGCTCACCAAGGCGACGATCCATAGCTGGTCTGAG
AGGATGATCAGCCACACTGGGACTGAGACACGGCCCAGACTCCTACGGGAGGCAGCAGTGGGGAATATTGGACAATGGGC
GCAAGCCTGATCCAGCCATGCCGCGTGAGTGATGACGGCCCTAGGGTTGTAAAGCTCTTTCAACGGTGAAGATAATGACG
GTAGCCGTAGAAGAAGCCCCGGCTAACTTCGTGCCAGCCGCCGCCGTAACAC
>OTU_207
AATCAACGCTGGCGGCGTGCCTCAGACATGCAAGTCGAACGGTTAAAGCTTTCTTCGGAAAGTGTATAAAGTGGCGTACG
GGAGAGTAACACGTAAGTAATCTACCCTCGGGTGGGGAATAACTTAAGGAAACTTAAGCTAATACCGCATAATGCAGTTT
ACTGTTAAAGCATTTATGCGCCTGGGGAGGAGCTTGCGGCAGATTAGCTAGTTGGTAAGGTAACGGCTTACCAAGGCGAC
GATCTGTAGCCGGTCTAAGAGGACGGTCGGTCTCACTGACACTGAATAACGGGTCAGACTCCTACGGGAGGCAGCAGTCG
GGAATTTTGGGCAATGGGCGAAAGCCTGACCCAGCAACGCCGCGTGAAGGATGAAGTCTTTCGGGATGTAAACTTCGGAA
ATATGGGAAGAATAAATGACGGTACCATATCTAAGGTCCGGCTAACTACGTGCCAGCCGCCGCCGTAACAC
>OTU_208
ATTGAACGCTGGCGGCATGCTTAACACATGCAAGTCGAACGGTAGCGCGAAGAGCTTGCTCTTTGGCGACGAGTGGCGAA
CGGGTGAGTAACGCGTAGGGACCTATCCTAGagagGgggACAACTCGGGGAAACTCGAGCTAATACCGCATAATCTCTAC
GGAGCAAAACTGGGGACTCTTCGGAGCCTGGTGCTCTAGGTTGGACCTGCGTCCGATTAGCTTGTTGGTGGGGTAAAGGC
CTACCAAGGCGACGATCGGTAGCTGTTCTGAGAGGAAGATCAGCCACACTGGGACTGAGACACGGCCCAGACTCCTACGG
GAGGCAGCAGTGGGGAATATTGGACAATGGgggCAACCCTGATCCAGCAATGCCGCGTgtgtgAAGAAGGCCTGCGGGTT
GTAAAGCACTTTCAGTGGGGAGGAAAGGCCTTAGGTTAAGAGCTAAAGGCTATGACGTTACCCACAGAAGAAGCACCGGC
TAACTCTGTGCCAGCCGCCGCCGTAACAC
>OTU_209
GATGAACGTTGGCGGCGTGCCTAACACATGCAAGTCGAACGAGAAGCTCACTTCGGTGAGTGGAAAGTGGCGCACGGGTG
CGTAACACGTAGCTCACCTGCCCCGAAGAGTGGGACAACCATTGGAAACGATGGCTAATACCACATAAGCTCACGGTTTG
TAGAAGATTGTGAGAAAAGCTGAGGCGCTTTGGGATGGGGCTGCGGCCCATCAGGTAGTTGGTGAGGTAAAGGCTCACCA
AGCCGACGACGGGTAGGGGACCTGAGAGGGTGGCCccccACACTGGGACTGAGACACGGCCCAGACTCCTACGGGAGGCA
GCAGTGAGGAATCTTGCACAATGGGCGCAAGCCTGATGCAGCGACGCCGCGTGAGCGAAGAAGGGTTTCGGCTCGTAAAG
CTCTTTTCTGtgtgACGAGAAAGGACGGTAGCACAGGAATAAGTCTCGGCTAACTACGTGCCAGCCGCCGCCGTAACAC
>OTU_210
GATGAACGCTAGCGGCAGGCTTAACACATGCAAGTCGAGGGGTAACAGGATTTAGTTTACTAGATTGCTGACGACCGGCG
CACGGGTGAGTAACGCGTATACAATTTACCTTTTACAGGgggATAGCCCAGAGAAATTTGGATTAATACCCCATAGTATT
ATTGATCGGCCTCGGTTGATAATTAAAGTTCCGGCGGTAAAAGATGAGTATGCGTCCTATTAGCTAGATGGTGAGGTAAC
GGCTCACCATGGCGACGATAGGTAGGGGTCCTGAGAGGGAGATCCcccACACTGGTACTGAGACACGGACCAGACTCCTA
CGGGAGGCAGCAGTGAGGAATATTGGTCAATGGAGGCAACTCTGAACCAGCCATGCCGCGTGCAGGAAGACGGCCCTATG
GGTTGTAAACTGCTTTTATACAGGAAGAAACCTCCTTACGTGTAGGGAGCTGACGGTACTGTAGGAATAAGCACCGGCTA
ACTCCGTGCCAGCCGCCGCCGTAACAC
>OTU_211
GATGAACGCTAGCGGCAGGCTTAACACATGCAAGTCGAGGGGTAACAGagagTGCTTGCACTTTGCTGACGACCGGCGCA
CGGGTGCGTAACGCGTATACAATCTACCTCTTACTGAGGGATAGCCCAGAGAAATTTGGATTAATACCTCATAGTATGTT
AGAGTGGCATCACTTTGATATTAAAGGTTACGGTAAGAGATGAGTATGCGTTCTATTAGCTAGTAGGTATGGTAACGGCA
TACCTAGGCAACGATAGATAGGGGCCCTGAGAGGgggATCCcccACACTGGTACTGAGACACGGACCAGACTCCTACGGG
AGGCAGCAGTGAGGAATATTGGTCAATGGGCGCAAGCCTGAACCAGCCATGCCGCGTGCAGGAAGACTGCCCTATGGGTT
GTAAACTGCTTTTATACAGGAAGAAACACTCCCTCGTGAGGGAGCTTGACGGTACTGTAAGAATAAGGATCGGCTAACTC
CGTGCCAGCCGCCGCCGTAACAC
>OTU_212
AACGAACGCTGGCGGCATGCTTAACACATGCAAGTCGAGCGAGAACCAGagagCTTGCTctctGGgggCAGCGGCGCACG
GGTGAGTAACGCGTGGATAACGTACCCTATGGTTGGGGATAACCCACCGAAAGGTGAGCTAATACCGAATGTGTTTCTTT
TAAGTTCGCTTTTAAGAAAGAAAGCGGGGCAACCCGCGCCAAAGGATCGGTCCGCGTTCCATCAGCTTGTTGGTAAGGTA
ACGGCTTACCAAGGCTACGACGGATAGCTGGTCTGAGAGGATGATCAGCCACACTGGGACTGAGACACGGCCCAGACTCC
TACGGGAGGCAGCAGTGGGGAATATTGGTCAATGGGCGAAAGCCTGAACCAGCAATGCCGCGTGAGTGATGAAGGCCTTC
GGGTTGTAAAGCTCTGTCAGCGGGAGCGAATAAGCCGTTTAATACACGGTGATGACGGTACCCGCAAAGGAAGCACCGGC
TAACTCTGTGCCAGCCGCCGCCGTAACAC
>OTU_213
AACGAACGCTGGCGGCATGCTTAACACATGCAAGTCGAACGAAGATATGGCTTCGGCCATAGACTGAGTGGCGCACGGGT
GAGTAACGCGTAGGAATTTACCTTTCGGTGGgggACAACTGATGGAAACGTCAGCTAATACCGCATACGCTCTACGGAGG
AAAGATTTATTGCCGAAGGATAAGCCTGCGTTAGATTAGGTAGTTGGTGGGGTAATGGCCCACCAAGCCGATGATCTATA
GCTGGTCTGAGAGGATGATCAGCCACACTGGGACTGAGACACGGCCCAGACTCCTACGGGAGGCAGCAGTGGGGAATATT
GGACAATGGgggCAACCCTGATCCAGCAATGCCGCGTGAGTGATGAAGGCCTTAGGGTTGTAAAACTCTTTCAACTGTGA
AGATGATGACGGTAACAGTAGAAGAAGCTCCGGCTAACTCCGTGCCAGCCGCCGCCGTAACAC
>OTU_214
GACGAACGCTGGCGGCATGGATTAGGCATGCAAGTCGAACGAAAAGCAGGAGCTTGCTCCTGTGGACGAGTGGCGAAAGG
GTGAGTAACGCGTGAGCAACCTGCCCTCAAGTTGGGAATAACACTTGGAAACGAGTGCTAATACCGAATGTGAATATTTT
CTCGCATGGGTTAATATTTAAaaaTTTATTGCTTGAGGATGGGCTCGCGTTCCATTAGCTAGTTGGTGTGGTAACGGCAT
ACCAAGGCGACGATGGATAGGTGGATTGAgagaTCGATCACCCACACTGGGACTGAGACACTGCCCAGACTCCTACGGGA
GGCTGCAGTCGAGAATCTTCCGCAATGCGCGAAAGCGTGACGGAGCAATGCCGCGTGGTGGATGAAGGCCTTCGGGTTGT
AAACACCTGTCACATGGGACGAATTtttGACGGTACCATGAGAGGAAGCCACGGCTAACTACGTGCCAGCCGCCGCCGTA
ACAC
>OTU_215
GATGAACGCTAGCGGCAGGCTTAACACATGCAAGTCGAGGGGTAACAGGGATTGCTTGCAATCCGCTGACGACCGGCGCA
CGGGTGCGTAACGCGTATAGAACCTACCTTTTACAGAGGGATAGCCTTTAGAAATGAAGATTAATACCTCATAGTATCAT
TTAATCGCATGATTTGAATGATTAAAGATTTATCGGTAGAAGATGGCTATGCGTCCTATTAGCTAGATGGTAAGGTAACG
GCTTACCATGGCAACGATAGGTAGGGGTCCTGAGAGGGAGATCCcccACACTGGTACTGAGACACGGACCAGACTCCTAC
GGGAGGCAGCAGTGAGGAATATTGGGCAATGGAGGCAACTCTGACCCAGCCATGCCGCGTGCAGGAAGACTGCCCTATGG
GTTGTAAACTGCTTTTATACAGGAAGAAACCTATCTACGTGTAGATAGCTGACGGTACTGTAAGAATAAGCACCGGCTAA
CTCCGTGCCAGCCGCCGCCGTAACAC
>OTU_216
AATGAACGTTGGCGGCGTGGATTAGGCATGCAAGTCGAGCGAGAAGTTTTAAaaaGATACTTCGGTTGATTtttAAAATG
GACAGCGGCGAAAGGGAGAGTAACGAGTAGATACGTGCCCGGgggTTCGGGATAGCGGGGAGAAATCGCCGGTAATACCG
AATAATGTTTCCGAACCAAAGATTTATTGCCCTCGGAGCGGTCTGCTTACTATTAGGTAGTTGGTGAGGTAATGGCTCAC
CAAGCCAAAGATGGTTAGCGGGTGTGAGAGCATGGCCCGTCTCACTGGGACTGAGACACTGCCCAGACACCTACGGGTGG
CTGCAGTCGAGAATCTTCCGCAATGGACGAAAGTCTGACGGAGCGACGCCGCGTGCGGGATGAAGGCCCTCGGGTTGTAA
ACCGCTGTCAGTAGGGAGGAAATTTTGACCGATCTACAGAGGAAGCACAGGCTAAGTTCGTGCCAGCCGCCGCCGTAACA
C
>OTU_217
GACGAACGCTGGCGGCGTGCTTAACACATGCAAGTTGAACGAAGCAATCTAGTAAGTTTACTTACCGGATTGACTTAGTA
GCGGACGGGTGAGTAACGCGTGAGTAACCTACCTTTGTGAGGgggACAACAGCTGGAAACGGCTGCTAATACCGCATAAG
GCCACGGCATTGAGTGATGCAGTGGTAAAAGATTTATCGCACAAAGATGGACTCGCGTCCCATTAGCTAGTTGGTAAGGT
AACGGCTTACCAAGGCGACGATGGGTAGCCGACCTGAGAGGGTGATCGGCCACACTGGAACTGAGACACGGTCCAGACTC
CTACGGGAGGCAGCAGTGGGGAATATTGGGCAATGGGCGCAAGCCTGACCCAGCAACGCCGCGTGAGGGAAGAATGTCTT
CGGATTGTAAACCTCTGTCCTTGGGGACGAAACAAATGACGGTACCCAAGGAGGAAGCTCCGGCTAACTACGTGCCAGCC
GCCGCCGTAACAC
>OTU_218
GACGAACGCTGGCGGCGTGCCTAATACATGCAAGTCGAACGCTTtttCTTTCACCGGAGCTTGCTCCACCGAAAGAAaaa
GAGTGGCGAACGGGTGAGTAACACGTGGGTAACCTGCCCATCAGAAGGGGATAACACTTGGAAACAGGTGCTAATACCGT
ATAACACTATTTTCCGCATGGAAGAAAGTTGAAAGGCGCTTTTGCGTCACTGATGGATGGACCCGCGGTGCATTAGCTAG
TTGGTGAGGTAACGGCTCACCAAGGCAACGATGCATAGCCGACCTGAGAGGGTGATCGGCCACACTGGGACTGAGACACG
GCCCAGACTCCTACGGGAGGCAGCAGTAGGGAATCTTCGGCAATGGACGAAAGTCTGACCGAGCAACGCCGCGTGAGTGA
AGAAGGTTTTCGGATCGTAAAACTCTGTTGTTAGAGAAGAACAAGGATGAGAGTAAAATGTTCATCCCTTGACGGTATCT
AACCAGAAAGCCACGGCTAACTACGTGCCAGCCGCCGCCGTAACAC
>OTU_219
AATGAACGTTGGCGGCATGGATTAGGCATGCAAGTCGAGCGAGAAGCTTAAGTTTGACGCTTCGGTTGATTTCTTAAGTG
GACAGCGGCGAAAGGGTGAGTAACGCGTAGTTATCTGCCCCAGGGTCTGGAATAGCCTCGGGAAACTGAGGGTAATGCCA
GATAATATCTCCGGATCAAAGGTGAGATTCCGCCCTGGGAGGAGACTGCGTACTACTAGCTTGTTGGTGGGGTAAAGGCC
TACCAAGGCTACGATGGTTAGCGGGCGTGAGAGCGTGGCCCGTCACACTGGGACTGAGACACTGCCCAGACACCTACGGG
TGGCTGCAGTCGAGAATCTTCGGCAATGGACGAAAGTCTGACCGAGCGATGCCGCGTGCGGGATGAAGGCCCTCGGGTTG
TAAACCGCTGTCAGTTGGGAGGAAGGCTCCGTGAAGAGCGGAGTTTGACCTATCTTCAGAGGAAGTACGGGCTAAGTTCG
TGCCAGCCGCCGCCGTAACAC
>OTU_220
AACGAACGTTGGCGGCGTGGATTAGGCATGCAAGTCGAGCGAGAAGGTGGTGTGGATCCCTTCGGGGTGAAGCACTGCTG
GACAGCGGCGAACGGGGTAGTAATACGTCGGAACATGCCCTCGGGACCGGGATAGCCACGGGAAACTGTGGGTAATACCG
GATAATCtctcAGGAGCAAATGGTGAGATTCCGCCCGAGGAGTGGCCGACCTGGTACCAGGTAGTTGGTGGGGTAAAAGC
CCACCAAGCCTGCGACGCCTAGGgggTGTGAGAGCATGGCCcccACCACCGGGACTGAGACACGGCCCGGACACCTACGG
GTGGCTGCAGTCGAGAATCTTCGGCAATGGACGCAAGTCCGACCGAGCGACGCCGCGTGCGGGACGACGGCCTTCGGGTT
GTAAACCGCTGTCAGGAGGGATGAAATCCCGCGGGGCCATCCCCACGGGTTGACAGAGCTCCAGAGGAAGCACGGGCTAA
GTTCGTGCCAGCCGCCGCCGTAACAC
>OTU_221
ATTGAACGCTGGCGGCGTGGCTAAAACATGCAAGTCGAACGGAAAGGCTTtttATGACGCTTCGGTTGATTAAaaaGTAC
TCGAGTGGCGAAAGGGCGAGGAATatataGATAACATACCTTTGGTTAAGGGATAGCTGCGGGAAACTGCAGGTAATACC
TTATAAGACCACGGCATCTACGGTTGCTGGGGTCAAAGGGGAGTTCCCTTCGGGGCCCCGACCAGagagTGGTCTATATC
CTATCAGGTAGTTGGTGAGGTAATGGCTCACCAAGCCTACGACGGGTACCGGGACTGAGAGGTTGATCCGGCGCATTGGG
ACTGAGACACTGCCCAGACTCCTACGGGAGGCTGCAGTAACGAATATTGGACAATGAACGAAAGTTTGATCCAGCGACGC
CGCGTGCAGGACGAAGTCCTTCGGGATGTAAACTGCTGTCAGGGACTACCAAGCGAGTGGGAGGAAATGCCCATAAGTTG
AGGAATCCCAGAGGAAGCCACGGCTAACTTCGTGCCAGCCGCCGCCGTAACAC
>OTU_222
AATGAACGTTGGCGGCGTGGATTAGGCATGCAAGTCGAGCGAGAATCTGTCTGTTGAAGCTTCGGTGGATTCAGTCAGAG
GACAGCGGCAAACGGCGTAGTAATGCGTAGGTACGTACCCTCAGGTCGGGGATAGCCACGGGAAACTGTGGGTAATACCC
GATGATCTCTGCGGAGCAAAGGTGTGATTCCGCCTGAGGAGCGGCTTACGTGATATTAGCTAGTTGGTGGGGTAATGGCC
TACCAAGGCGACGATGTCTAGGgggTGTGAGAGCATGGCCcccACGACCGGAACTGAGACACTGTCCGGACACCTACGGG
TGGCTGCAGTCGAGAATCTTCCGCAATGGGCGCAAGCCTGACGGAGCGACGCCGCGTGCGGGATGAAGGCCCTTGGGTTG
TAAACCGCTGTCAGAGGGGATGAAATCATGGTGGGCAATCCCTCCATGTTGACAGAGCCTCAAAGGAAGCACGGGCTAAG
TACGTGCCAGCCGCCGCCGTAACAC
>OTU_223
AATGAACGTTGGCGGCGTGGATTAGGCATGCAAGTCGTGCGAGAAGTGTTttttGCTTGCATTGAACACGGACAGCGGCG
AAAGGGAGAGTAACGCGTGGTTACATGCCCAGGGGTCCAGGATAGCGTTGGGAAACTGGCGGTAATACTGGATGATATCT
AAGGATCAAAGGTGTGATTCCGCCCTTGGATTGGACCGCGTACTATTAGCTTGTTGGTGGGGTAACGGCCTACCAAGGCT
GCGATGGTTACCGGGTGTGAGAGCATGGCCCGGCTCACTGGGACTGAGACACTGCCCAGACACCTACGGGTGGCTGCAGT
CGAGAATCTTCGGCAATGGACGAAAGTCTGACCGAGCGACGCCGCGTGCGGGATGAAGGCCCTCGGGTTGTAAACCGCTG
TCAGTTGGGAGGAAGGACCTGTGCAGAGCAGGTCTTGACCGATCTTCAGAGGAAGGACGGGCTAAGTTCGTGCCAGCCGC
CGCCGTAACAC
>OTU_224
GATGAACGCTAGCGGCAGGCTTAACACATGCAAGTCGAGGGGTAACAGTCCCGCTTTCGGGCGGGAGCTGACGACCGGCG
CACGGGTGCGTAACGCGTATAGAACCTACCTTTTACAGAGGGATAGCCTTTAGAAATGAAGATTAATACCTCATAGTATC
ATTTAATCGCATGGTTTGAATGATTAAAGATTTATCGGTAAAAGATGGCTATGCGTCCTATTAGCTAGATGGTAAGGTAA
CGGCTTACCATGGCAACGATAGGTAGGGGCCCTGAGAGGgggATCCcccACACTGGTACTGAGACACGGACCAGACTCCT
ACGGGAGGCAGCAGTGAGGAATATTGGGCAATGGAGGCAACTCTGACCCAGCCATGCCGCGTGCAGGAAGACTGCCCTAT
GGGTTGTAAACTGCTTTTATACAGGAAGAAACCTATCTACGTGTAGATAGCTGACGGTACTGTAAGAATAAGCACCGGCT
AACTCCGTGCCAGCCGCCGCCGTAACAC
>OTU_225
AACGAACGCTGGCGGCATGCTTAACACATGCAAGTCGAACGAGATCTTCGGATCTAGTGGCGCACGGGTGCGTAACGCGT
GGGGATCTACCATAGGGTACGGAATAACTCAGAGAAATTTGTGCTAATACCGTATAATGTCTTCGGACCAAAGATTTATC
GCCCTTTGATGAACCCGCGTAAGATTAGCTTGTTGGTGAGGTAAAGGCTCACCAAGGCGACGATCTTTAGCTGGTCTGAG
AGGATGATCAGCCACACTGGGACTGAGACACGGCCCAGACTCCTACGGGAGGCAGCAGTGGGGAATATTGGACAATGGGC
GAAAGCCTGATCCAGCAATGCCGCGTGAGTGATGAAGGCCTTAGGGTTGTAAAGCTCTTTTACTAGGGATGATAATGACA
GTACCTAGAGAATAAGCTCCGGCTAACTCCGTGCCAGCCGCCGCCGTAACAC
>OTU_226
AACGAACGCTGGCGGCAGGCCTAACACATGCAAGTCGAACGAGAAGCTTTCCTTCGGGAAAGTGGAAAGTGGCAGACGGG
TGAGTAACGCGTGGGAACGTGCCTTTCGGTCCGGAATAACTCAGGGAAACTTGGGCTAATACTGGATACGCCCTTCGGgg
gAAAGATTTATCGCCGAAAGATCGGCCCGCGTCAGATTAGCTTGTTGGTGGGGTAATGGCTCACCAAGGCGACGATCTGT
AGCTGGTCTGAGAGGATGATCAGCCACACTGGGACTGAGACACGGCCCAGACTCCTACGGGAGGCAGCAGTGGGGAATAT
TGGACAATGGGCGCAAGCCTGATCCAGCCATGCCGCGTGGGTGAAGAAGGCCCTAGGGTTGTAAACCCCTTTCAGCGGGG
AAGATAATGACGGTACCCGCAGAAGAAGCCCCGGCTAACTCCGTGCCAGCCGCCGCCGTAACAC
>OTU_227
GACGAACGCTGGCGGCGTGCTTAACACATGCAAGTCGAGCGGTAAGGCCCCTTCGGgggTACACGAGCGGCGAACGGGTG
AGTAACACGTGGGTGACCTGCCCTCAGCTCTGGGATAAGCCCGGGAAACTGGGTCTAATACTGGATATGACTCTGCGGTG
CATGCCGTGGGGTGGAAAGCCTTGTGCGGCTGAGGATGGGCCCGCGGCCTATCAGCTTGTTGGTGGGGTGATGGCCTACC
AAGGCGACGACGGGTAGCCGGCCTGAGAGGGCGACCGGCCACACTGGGACTGAGACACGGCCCAGACTCCTACGGGAGGC
AGCAGTGGGGAATCTTGCGCAATGGGCGAAAGCCTGACGCAGCGACGCCGCGTGAGGGATGACGGCCTTCGGGTTGTAAA
CCTCTTTCAGCTCCGACGAAGCGGAAGTGACGGTAGGAGCAGAAGAAGCACCGGCCAACTACGTGCCAGCCGCCGCCGTA
ACAC
>OTU_228
GATGAACGCTGGCGGTATGCTTTACACATGCAAGTCGAACGAAAGTTttttAAACTTTAGTGGCGGACGGGTGAGTAACA
CGTGAGAATTTACCTTTAGGAGGGGAATAACAATTGGAAACAATTGCTAATGCCGCATATTATTAAAACAATAAAAGAAG
AAATTCGCCTAAAGAAAAGCTTGCGTCTGATTAGCTAGTTGGTGGGGTAAAGGCCTACCAAGGCGACGATCAGTAGCTGG
TTTGAGAGGATGACCAGTCACACTGGAACTGAGACACGGTCCAGACTCCTGCGGGAGGCAGCAGTGGGGAATTTTCTGCA
ATGGGCGAAAGCCTGACAGAGCAATACCGCGTGAGGGAATCAGAAAGCCCAAAGGGTTGTAAACCTCTTTTGTTAAGGAA
GAAGTTCTGACGTTACTTAACGAATAAGCATCGGCTAACTCCGTGCCAGCCGCCGCCGTAACAC
>OTU_229
GATGAACGCTAGCGGTGCGCCTAACACATGCAAGTCGAGCGGGATTATCCAGACAGAAGCCTTCGGGTGGAAGATTGGAT
ATGAGAGCGGCGAACGGGTGAGTACTACCTTGGTACCTGCCcccAAGTCAGGGATAGCCATTGGAAACGATGATTAATAC
CGGATGTGCTGGAGACAGTAAAGATTTATCGCTTGGGGAGGGGCCTCGGTCCTATCAGCTAGTTGGTGGAGTAACGGTCT
ACCAAGGCAATGACGGGTAGCTGGTCTGAGAGGACGATCAGCCACAATGGAACTGAGACACGGTCCATACTCCTACGGGA
GGCAGCAGTGAGGAATCTTCCGCAATGGACGAAAGTCTGACGGAGCGACACCGCGTGAAGGATGAAGGCCTAACGGTTGT
AAACTTCTTTTCTGAGGGAGCAAAATGAGAGTACCTCAGGAATAAGGGACGGCTAACTACGTGCCAGCCGCCGCCGTAAC
AC
>OTU_230
AACGAACGCTGGCGGCAGGCCTAACACATGCAAGTCGAACGCACTCTTCGGAGTGAGTGGCAGACGGGTGAGTAACGCGT
GGGAATCTACCTAGTGGTGGgggATAACTTCGGGAAACCGGAGCTAATACCCCATAAGCCCTTCGGgggAAAGTTtttCG
CCATTAGATGAGCCCGCGTTAGATTAGCTAGTTGGTAGGGTAATGGCCTACCAAGGCGACGATCTATAGCTGGTCTGAGA
GGATGATCAGCCACACTGGGACTGAGACACGGCCCAGACTCCTACGGGAGGCAGCAGTGGGGAATATTGCACAATGGGCG
CAAGCCTGATGCAGCCATGCCGCGTgtgtgATGAAGGCCTTAGGGTTGTAAAACACTTTCATCGGTGAAGATAATGACGG
TAGCCGAAGAAGAAGCCCCGGCTAACTCCGTGCCAGCCGCCGCCGTAACAC
>OTU_231
GATGAACGCTGGCGGCGTGCTTAACACATGCAAGTCGAACGAGAATTAACAAACTGATTACTTCGGTATGAAGTATGTTA
AGGACAGTGGCGGACGGGCGAGTAACGCGTGAGTAACCTACCCTATGCAGGgggACAACATCGGGAAACTGGTGCTAATA
CCGCATAAGACCACAGTATCGCATGGTACAGAGGTCAAAGCTCTGGCGGCATAGGATGGACTCGCGTCCAATTAGCTAGT
TGGTGAGGTAATGGCTCACCAAGGCGACGATTGGTAGCCGAACTGAGAGGTTGATCGGCCGCATTGGGACTGAGACACGG
CCCAGACTCCTACGGGAGGCAGCAGTGGGGAATATTGCGCAATGGgggAAACCCTGACGCAGCAACGCCGCGTGAAGGAA
GAAGGCTTTCGGGTTGTAAACTTCTTTGATGAGGGAAGATAGTGACGGTACCTCAAaaaCAAGCCACGGCTAACTACGTG
CCAGCCGCCGCCGTAACAC
>OTU_232
AATGAACGTTGGCGGCATGGATTAGGCATGCAAGTCGAGCGAGAAGTCTTttttGCTTGCATTAAAGATGGACAGCGGCG
AAAGGGAGAGTAACGCGTAGAAATGTACCCCGAGGTCCGGGATAGCTGCGGGAAACTGCAGGTAATACCGGATGATGTCT
CCGGACCAAAGTTtttCGCCTTGGGAGCAGTCTGCGTATTATTAGGTTGTTGGTGGGGTAATGGCCTACCAAGCCTCAGA
TGATTAGCGGGCGTGAGAGCGTGGCCCGTCTCACTGGGACTGAGACACTGCCCAGACACCTACGGGTGGCTGCAGTCGAG
AATCTTCCGCAATGGACGAAAGTCTGACGGAGCAATGCCGCGTGGTGGATGAAGGCCCTCGGGTTGTAAACACCTGTCAG
TAGGAAGGAAATTTTGACCGATCTACAGAGGAAGTCCGGGCTAAGTACGTGCCAGCCGCCGCCGTAACAC
>OTU_233
AACGAACGCTGGCGGCAGGCCTAACACATGCAAGTCGAGCGCACCTTCGGGTGAGCGGCGGACGGGTTAGTAACGCGTGG
GAACGTGCCCAGATCTGCGGAATAGCCACTGGAAACGGTGAGTAATACCGCATACGCCCTTCGGgggAAAGATTTATCGG
ATTTGGATCGGCCCGCGTTAGATTAGATAGTTGGTGGGGTAACGGCCTACCAAGTCTACGATCTATAGCTGGTTTTAGAG
GATGATCAGCAACACTGGGACTGAGACACGGCCCAGACTCCTACGGGAGGCAGCAGTGGGGAATCTTGGACAATGGGCGC
AAGCCTGATCCAGCCATGCCGCGTGAGTGATGAAGGCCCTAGGGTCGTAAAGCTCTTTCGCCAGAGATGATAATGACAGT
ATCTGGTAAAGAAACCCCGGCTAACTCCGTGCCAGCCGCCGCCGTAACAC
>OTU_234
GATGAACGCTGGCGGCGTGCCTAACACATGCAAGTCGAGCGAGAAGCTTATGAAGGATCCTTCGGGTGACTGATTAAGTG
GAAAGCGGCGGACGGGTGAGTAACGCGTGGGTAACCTGCCCCATACAAAGGGATAGCCACTGGAAACGGTGATTAATACC
ATATGAGATCGTAGAGTCGCATGACTTAGCGGTTAAAGATTTATCGGTATGGGATGGACCCGCGTCTGATTAGCTAGTTG
GTAAGGTAACGGCTTACCAAGGCGACGATCAGTAGCCGACCTGAGAGGGTGATCGGCCACACTGGAACTGAGACACGGTC
CAGACTCCTACGGGAGGCAGCAGTGGGGAATATTGCACAATGGGCGCAAGCCTGATGCAGCAACGCCGCGTGAGCGATGA
AGGCCTTCGGGTCGTAAAGCTCTGTCCTCAAGGAAGAATAAATGACGGTACTTGAGGAGGAAGCCCCGGCTAACTACGTG
CCAGCCGCCGCCGTAACAC
>OTU_235
GATGAACGCTGGCGGCGTGCTTAACACATGCAAGTCGAGCGAGAAGGTTATGACTGATTCTTCGGATGAGGGATTGACTG
GAAAGCGGCGGACGGGTGAGTAACGCGTGGGTAACCTGCCTTGTACAGAGGGATAGCCACTGGAAACGGTGATTAATACC
TCATAAGGCTACAACATCGCATGATGAAGTAGTCAAAACTCCGGTGGTACAAGATGGACCCGCGTCTGATTAGCTAGTTG
GTGGGGTAAAGGCTTACCAAGGCGACGATCAGTAGCCGACCTGAGAGGGTGAACGGCCACACTGGAACTGAGACACGGTC
CAGACTCCTACGGGAGGCAGCAGTGGGGAATATTGCACAATGGGCGAAAGCCTGATGCAGCAACGCCGCGTGAGCGAAGA
AGGCCTTCGGGTCGTAAAGCTCTGTCCTAAGGGAAGAATAATGACGGTACCTTAGGAGGAAGCCCCGGCTAACTACGTGC
CAGCCGCCGCCGTAACAC
>OTU_236
AATGAACGTTGGCGGCGTGGATTAGGCATGCAAGTCGAGCGAGAAGATTCCTTCGGGAATTGGACAGCGGCGAAAGGGAG
AGTAACGCGTAGATATCTACCTCGAGGACCGGGATAGCGGCGGGAAACTGCCGGTAATACCGGATAACATCTCAGGATCA
AAGGTGTGATTCCGCCTCGAGATGAGTCTGCGTCCTATTAATGCTTGTTGGTGTGGTAACGGCGCACCAAGGCGAAGATG
GGTACCGGGTGTGAGAGCATGGCCCGGCTCACTGGGACTGAGACACTGCCCAGACACCTACGGGTGGCTGCAGTCGAGAA
TCTTCGGCAATGGGCGAAAGCCTGACCGAGCGACGCCGCGTGCGGGATGAAGGCCCTCGGGTTGTAAACCGCTGTCAGTA
GGGAGCAAATTTCTTGGGGTTATCCCCTTGAATTGAGCGATCTTCAGAGGAAGTACGGGCTAAGTTCGTGCCAGCCGCCG
CCGTAACAC
>OTU_237
AACGAACGCTGGCGGCAGGCCTAACACATGCAAGTCGAACGAACCCCTCGGGGTGAGTGGCGCACGGGTGCGTAACACGT
GGGAATATACCCTTCAGTACGGAATAACGCAGAGAAATTTGTGCTAATACCGTATAATGACTCCGGTCCAAAGATTTATC
GCTGAAGGATTAGCCCGCGTCTGATTAGATAGTTGGTGAGGTAAGAGCTCACCAAGTCGACGATCAGTAGCTGGTTTGAG
AGGATGATCAGCCACACTGGAACTGAGACACGGTCCAGACTCCTACGGGAGGCAGCAGTGAGGAATATTGCGCAATGGgg
gAAACCCTGACGCAGCCATGCCGCGTGAGTGACGAAGGCCTTAGGGTTGTAAAGCTCTTTCAGATGCGAAGATAATGACG
GTAACATCAGAAGAAGCTCCGGCTAAATTCGTGCCAGCCGCCGCCGTAACAC
>OTU_238
GATGAACGCTAGCGGCAGGCTTAACACATGCAAGTCGAGGGGTAACAGGAGATAGTTTACTATTTTGCTGACGACCGGCG
CACGGGTGAGTAACGCGTATACAATTTGCCTTTTACAGGAGGATAGCCCAGAGAAATTTGGATTAATACTCCATGGTATT
ACGGGATCGCATGGTTTTGTAATTAAAGTTTCGGCGGTAGAAGATGAGTATGCGTCCTATTAGCTAGTTGGTAAGGTAAC
GGCTTACCAAGGCGACGATAGGTAGGGGTCCTGAGAGGGAGATCCcccACACTGGTACTGAGACACGGACCAGACTCCTA
CGGGAGGCAGCAGTGAGGAATATTGGTCAATGGAGGCAACTCTGAACCAGCCATGCCGCGTGCAGGAAGACTGCCCTATG
GGTTGTAAACTGCTTTTATACAGGAAGAAACTTATCCACGTGTGGATAACTGACGGTACTGTACGAATAAGGACCGGCTA
ACTCCGTGCCAGCCGCCGCCGTAACAC
>OTU_239
GATGAACGCTAGCGGCAGGCCTAACACATGCAAGTCGAACGGTAAGTTGGAAGCTTGCTTCTAACACGAGTGGCGCACGG
GTGCGTAACGCGTATGCAATCTGCCCTTTTCTGGAGAATAGCCCTTAGAAATGAGGATTAATACTCCATAGTATAACAAT
TTCGCATGTTATTGTTATTAAAGCTTCGGCGGAAAAGGATGAGCATGCGTCCCATTAGTTTGTTGGTGAGGTAACGGCTC
ACCAAGACTGCGATGGGTAGGgggCCTGAGAGGGTTGTCCcccACACTGGTACTGAGACACGGACCAGACTCCTACGGGA
GGCAGCAGTGAGGAATATTGGTCAATGGACGAAAGTCTGAACCAGCCATGCCGCGTGCAGGATGACTGCCCTATGGGTTG
TAAACTGCTTTTAtataGGAAGAAACCTTTCTACGTGTAGagagCTGACGGTACTATAAGAATAAGGACCGGCTAACTCC
GTGCCAGCCGCCGCCGTAACAC
>OTU_240
GATGAACGCTAGCGGAAGGCTTAATACATGCAAGTCGAGGGGCAGCATGACTGGCATTAGTTGGTTGATGGCGACCGGCG
CACGGGTGAGTAACGCGTACACTACCTACCTTTCACTACGGGATAGTATCGGGAAACTGATAGTAATACCGTATGGTCCA
CTTCGGTGGTAAAGAGTTATCGGTGGAAGATGGGTGTGCGTTAGATTAGCTAGTTGGTAAGGTAACGGCTTACCAAGGCG
ACGATCTATAGGgggCGTGAGAGCGTGATCCcccACACGGGTACTGAGACACGGACCCGACTCCTACGGGAGGCAGCAGT
AAGGAATATTGGACAATGGGCGGAAGCCTGATCCAGCCATTCCGCGTGGAGGAAGACGGCCTTATGGGTTGTAAACTCCT
TTTATCAGGGAAGAAACCCCAGGATTTGTTCTGGGCTGACGGTACCTGAAGAATAAGCACCGGCTAACTCCGTGCCAGCC
GCCGCCGTAACAC
>OTU_241
ATTGAACGCTGGCGGAATGCTTTACACATGCAAGTCGAACGATGAAGCCTAGCTTGCTAGGTGAATTAGTGGCGGACGGG
TGAGTAATatatCGGAACATGCCCATTAATGGgggATAACTAGCCGAAAGGTTAGCTAATACCGCATAACATCTACGGAT
TAAAGCTGGGGACCTTCGGGCCTGGCGTTAGTGGAGTGGCCGATATCTGATTAGCTAGATGGTGGGGTAATGGCCTACCA
TGGCGACGATCAGTAACTGGTCTGAGAGGACGACCAGTCACACTGGGACTGAGACACGGCCCAGACTCCTACGGGAGGCA
GCAGTGGGGAATTTTGGACAATGGgggCAACCCTGATCCAGCCATTCCGCGTGAGTGAAGAAGGCCTTCGGGTTGTAAAG
CTCTTTCACAAGTAAAGAAACGGTATGGGTTAATAGCCTATGCTAATGACGGTAACTTGAGAAGAAGCACCGGCTAACTA
CGTGCCAGCCGCCGCCGTAACAC
>OTU_242
AGCGAACGTTAGCGGGAGGCTTAACACATGCAAGTCGAGCGAGAACGTCACTTCGGTGGCTAGTACAGCGGCGGACGGGT
GAGTAACACGTGGATAATCTGCCCTTTGGCGGgggACAACAGCTCGAAAGGGTTGCTAATACCGCATACGTCTCTAGAGG
CTCCGGCTTCTAGAGGGAAAGATGGCCTCTTCATGAAAGCTATCACCAAAGGATGAGTCCGCGTAGCATCAGCTTGTTGG
TGGGGTAATGGCCTACCAAGGCAAAGACGCTTAGCTGGTCTGAGAGGATGATCAGCCACACTGGGACTGAGATACGGCCC
AGACTCCTACGGGAGGCAGCAGTGGGGAATATTGGACAATGGGCGCAAGCCTGATCCAGCCATCCCGCGTGAGTGATGAA
GGCTCTCGGGTCGTAAAGCTCTGTGGGGAgagaCGAAaaaCTGCAGGAACAATACCCTGCAGCCTGACGGTATCTCCTTA
GCAAGCACCGGCTAACTCCGTGCCAGCCGCCGCCGTAACAC
>OTU_243
AACGAACGCTGGCGGCAGGCTTAACACATGCAAGTCGAGCGGACACTTCGGTGTTAGCGGCGGACGGGTGAGTAATGCTT
GCAGATGTACCCTTTGGTAAAGGATAACGTGTGGAAACGGACGCTAATACTTTATAAGCACTATGGTGGAAAGATTTATC
GCCAAGGGATCATTTCAAGTCGGATTAGCTAGTTGTAGGGGTAAAGGCTCTACAAGGCGATGATCCGTAGCCGGCCTGAG
AGGGTGGACGGCCACACCGGGACTGAGACACGGCCCGGACTCCTACGGGAGGCAGCAGTGGGGAATATTGGACAATGGgg
gCAACCCTGATCCAGCCATGCCGCGTGCGTGAAGAAGGCCTTAGGGTTGTAAAGCGCTTTTGTCAGGGAAGATAATGACT
GTACCTGAAGAATAAGCCCCGGCTAACTCCGTGCCAGCCGCCGCCGTAACAC
>OTU_244
GATGAACGCTAGCGGCAGGCCTAACACATGCAAGTCGAGGGGTAACATTGGTTGCTTGCAACCAGATGACGACCGGCGCA
CGGGTGCGTAACGCGTATACAATCTGCCTTGTACTGGgggATAGCCTTTGGAAACGAAGATTAATACCCCATAGTATGTA
TGGATGGCATCATTTATACATTAAAGGTTACGGTACAAGATGAGTATGCGTCCTATTAGTTAGTTGGTGTGGTAACGGCA
CACCAAGACGACGATAGGTAGGGGCCCTGAGAGGgggATCCcccACACTGGTACTGAGACACGGACCAGACTCCTACGGG
AGGCAGCAGTGAGGAATATTGGACAATGGgggCAACCCTGATCCAGCCATGCCGCGTGCAGGAAGACTGCCCTATGGGTT
GTAAACTGCTTTTATACGGGAAGAAACACTCCCTCGTGAGGGAATTTGACGGTACCGTAAGAATAAGGATCGGCTAACTC
CGTGCCAGCCGCCGCCGTAACAC
>OTU_245
GATGAACGCTTGCGGCAGGCTTAATACATGCAAGTCGAGGGGTAACAGGGAAGCTTGCTTCCGCTGACGACCGGCGCACG
GGTGCGTAACGCGTATGCAACCTACCTATAACAGAGGGATAGCCCAGAGAAATTTGGATTAATACCTCATAATATGTTTG
AATCGCATGGTTTAAACATTAAAGTTCCGGCGGTTATAGATGGGCATGCGTGACATTAGCTAGTTGGTAAGGTAACGGCT
TACCAAGGCTTCGATGTCTAGGGGTTCTGAGAGGAAGGTCCcccACACTGGTACTGAGACACGGACCAGACTCCTACGGG
AGGCAGCAGTAGGGAATATTGGTCAATGGGCGAAAGCCTGAACCAGCCATGCCGCGTGCAGGAAGACGGCCTTATGGGTT
GTAAACTGCTTTTAtataGGGATAAACCATTGCTCGTGAGCAATGCTGAAGGTACTATATGAATAAGGATCGGCTAACTC
CGTGCCAGCCGCCGCCGTAACAC
>OTU_246
AACGAACGTTGGCGGCGTGGATTAGGCATGCAAGTCGAGCGAGAAGCTCCCTTCGGGGAGTGGACAGCGGCGAACGGGGT
AGTAATACGTCGGAACGTGCCCTCGGGACCGGGATAGCCACGGGAAACTGTGGGTAATACCGGATAATCtctcAGGAGCA
AATGGTGAGATTCCGCCCGAGGAGCGGCCGACCTGGTACCAGGTTGTTGGTGGGGTAATGGCCCACCAAGCCTGCGACGC
CTAGGgggTGTGAGAGCATGGCCcccACCACCGGGACTGAGACACGGCCCGGACACCTACGGGTGGCTGCAGTCGAGAAT
CTTTGGCAATGGACGCAAGTCCGACCAAGCGACGCCGCGTGCGGGACGACGGCCCTCGGGTTGTAAACCGCTGTCAGGAG
GGATGAAATCCGATTGGGCTATCCCTTTCGGTTGACAGAGCTCCAGAGGAAGCACGGGCTAAGTTCGTGCCAGCCGCCGC
CGTAACAC
>OTU_247
GATGAACGCTAGCGGCAGGCCTAACACATGCAAGTCGAACGGTAACAGGGATTAGCTTGCTAATTTGCTGACGAGTGGCG
CACGGGTGCGTAACGCGTATACAATCTACCTTTTACAGTGGGATAGCCTTTAGAAATGAAGATTAATACCGCATAGTATA
TTTAAATGGCATCATTTAAATATTAAAGATTTATCGGTAAAAGATGAGTATGCGTTCTATTAGCTAGATGGTAAGGTAAC
GGCTTACCATGGCAACGATAGATAGGGGCCCTGAGAGGgggATCCcccACACTGGTACTGAGACACGGACCAGACTCCTA
CGGGAGGCAGCAGTGAGGAATATTGGACAATGGGCGCAAGCCTGATCCAGCCATGCCGCGTGCAGGAAGACTGCCCTATG
GGTTGTAAACTGCTTTTATACGGGAAGAAACACCGCTACGTGTAGCGGCTTGACGGTACCGTAAGAATAAGGATCGGCTA
ACTCCGTGCCAGCCGCCGCCGTAACAC
>OTU_248
GACGAACGCTGGCGGCGTGCCTAACGCATGCAAGTCGAACGAAGAACTTTAGATAATCTCTTCGGAGTGAATTtttAGTT
ACTGAGTGGCGGACGGGTGAGTAACGCGTGAGCAACCAACCCTGCACAGGgggATAACATCTGGAAACGGATGCTAATAC
CGCATAAGACCACACTATCGCATGATAGAGGGGTCAAAACTCCGGTGGTGCAGGACGGGCTCGCGTCCCATTAGCTAGTA
GGTAGGGTAACAGCCTACCTAGGCGACGATGGGTAGCCGAGCTGAGAGGCTGATCGGCCACACTGGGACTGAGACACGGC
CCAGACTCCTACGGGAGGCAGCAGCGAGGAATATTGTCCAATGGgggAAACCCTGAGACAGCAACGCCGCGTGAAGGAAG
AAGGCCTTCGGGTTGTAAACTTCTGTGACAGGGGACGAAACAAATGACGGTACCCTGAGAGGAAGCCCCGGCAAACTACG
TGCCAGCCGCCGCCGTAACAC
>OTU_249
GATGAACGCACAAGACGTGCCTAACACATGCAAATCGAATGAAAATAATTAATTATTGTTTTCATGGTGAACGGGTGAGT
AACACATAAGAATCAGCTTTTAGATAAGGCATAAAAGAGTAATATCTTGGTAATTCCTTATATGCGCAGCAGTGCTTAAa
aaGGGGAGTCCCGTCTAAaaaCGAGCTTATGCCTGATTAGCTAGTTGGCGAGTTAAAAGCTCACCAAGGCGAAGATCAGT
AGCTGGCCTGAGAGGGCGGCCAGCCACATTGGGACTGAGACACGGCCCAAACTCCTACGGGAGGCAGCAGTGGGGAATCT
TCTGCAATGGGCGCAAGCCTGACAGAGCGGCGTCGTGTGAAGGAAGAAGGCCTGAAATAGGTTGTAAACTTCTTTTACTG
AGTAATGAATAATGACAATGCAGTAAaaaaGTATCGGCTAACTCCGTGCCAGCCGCCGCCGTAACAC
>OTU_250
GATGAACGCTAGCGGCAGGCTTAACACATGCAAGTCGAGGGGTAtataGAAAGCTTGCTTtttATAGAGACCGGCAAACG
GGTGCGTAACACGTACGCAACCTACCCTAAAGTGGAGGATAGCCTTTGGAAACGAAGATTAATACTCCATAATATCATAA
TGCGGCATCGTATAATGATTAAAGAATTTCGCTTTAGGATGGGCGTGCGCCTGATTAGATAGTTGGTGAGGTAACGGCTC
ACCAAGTCGACGATCAGTAGCTGATGTGAGAGCATGATCAGCCACACGGGCACTGAGACACGGGCCCGACTCCTACGGGA
GGCAGCAGTGAGGAATATTGGTCAATGGAGGCAACTCTGAACCAGCCATGCCGCGTGGAGGATGAAGGTCCTCTGGATTG
TAAACTTCTTTTATTAGGGAAGAAACCCGAGATTTCTATCTTGGTTGACGGTACCTAACGAATAAGCACCGGCTAACTCC
GTGCCAGCCGCCGCCGTAACAC
>OTU_251
AACGAACGCTGGCGGCAGGCCTAACACATGCAAGTCGAGCGCACTCTTCGGAGTGAGCGGCGGACGGGTTAGTAACGCGT
GGGAATATGCCCAGATCTACGGAATAGCCTTTGGAAACGAAGAGTAATACCGTATACGCCCTTCGGgggAAAGATTTATC
GGATTTGGATTAGCCCGCGTTAGATTAGATAGTTGGTGGGGTAACGGCCTACCAAGTCGACGATCTATAGCTGGTTTGAG
AGGATGATCAGCAACACTGGGACTGAGACACGGCCCAGACTCCTACGGGAGGCAGCAGTGGGGAATCTTGGACAATGGGC
GCAAGCCTGATCCAGCCATGCCGCGTGAGTGATGAAGGCCCTAGGGTCGTAAAGCTCTTTCGCCAGGGATGATAATGACA
GTACCTGGTAAAGAAACCCCGGCTAACTCCGTGCCAGCCGCCGCCGTAACAC
>OTU_252
GATGAACGCTGGCGGTATGCCTAACACATGCAAGTCGTACGAGAGTTtttAACTCAAGTGGCGGACGGGTGAGTAACACG
TGAGAATTTACCTTTAGGAGGgggACAACAATTGGAAACGATTGCTAATACCCCATATGCTTTCGAGTGAAATGGTTttt
CCGCCTAAAGAAAAGCTCGCGGCTGATTAGCTTGTTGGTAAGGTAACGGCTTACCAAGGCGACGATCAGTATCTGGTTTG
AGAGGACGATCAGACacacTGGAACTGAGACACGGTCCAGACTCCTACGGGAGGCAGCAGTGGGGAATTTTCCGCAATGG
GCGAAAGCCTGACGGAGCAATACCGCGTGAGGGAAGACTGCCTATGGGTTGTAAACCTCTTttttCAGGGAGGAACAAAA
TGACGTGTACCTGAAGAATAAGCATCGGCTAACTCCGTGCCAGCCGCCGCCGTAACAC
>OTU_253
AACGAACGCTGGCGGCGTGGATAAGACATGCAAGTCGAACGGGGAATATGATTAGCTTGCTAAATGTATTCCTAGTGGCG
AACGGGTGCGTAACACGTGAGTAATATGCCTCGAAGAGCGGGATAGCCCAGCGAAAGTTGGATTAATACCGCATGTGGCG
GGGATGGGATTCCATTCTTTGCTAAAGGTAGGGACCTTCGGGCCTGCCGCTTCGAGATTGGCTCGCGGCCTATCAGTTTG
TTGGTGGGGTAATGGCCTACCAAGACGACGACGGGTAGCCGGTCTGAGAGGATGTCCGGCCACACTGGAACTGAGACACG
GTCCAGACACCTACGGGTGGCAGCAGTCGAGAATCATGCACAATGGGCGAAAGCCTGATGCTGCAACGCCGCGTGGAGGA
TGAAGGCCCTAGGGTCGTAAACTCCTGTCACCAATGAGTATGGGTGGATGTGTTAATAGCACATTTATTTGATAGTAATT
GGAGAGGAAGGGACGGCTAACTTCGTGCCAGCCGCCGCCGTAACAC
>OTU_254
AACGAACGCTGGCGGCAGGCCTAACACATGCAAGTCGGACGAGAAGGTTCCTTCGGGAACTGGAGAGTGGCGCACGGGTG
AGTAACGCGTGGGGACCTACCTCTTAGTGGgggATAACGGTTGGAAACGACCGCTAATACCGCATACGCCCTTCGGgggA
AAGATTTATCGCTAAGAGATGGACCCGCGTTGGATTAGATAGTTGGTGAGGTAACGGCTCACCAAGTCAGCGATCCATAG
CTGGTTTGAGAGGATGATCAGCCACACTGGGACTGAGACACGGCCCAGACTCCTACGGGAGGCAGCAGTGGGGAATATTG
GACAATGGgggCAACCCTGATCCAGCCATGCCGCGTGAGTGAAGAAGGCCTTCGGGTTGTAAAGCTCTTTCAGATGCGAA
GATGATGACGGTAACATCAGAAGAAGCCCCGGCTAATTTCGTGCCAGCCGCCGCCGTAACAC
>OTU_255
AATGAACGTTGGCGGCGTGGATTAGGCATGCAAGTCGAGCGAGAAACTTTTAAAAGATACTTCGGTTGATTTTAGAAGCG
GACAGCGGCGAAAGGGAGAGTAACGAGTAGATTACGTACCCGAGGGTCCGGGATAGCTGCGGGAAACTGCAGGTAATACC
GGATAATGTTTCCGAACCAAAGATTTATTGCCCTCGGAGCGGTCTGCTTACTATTAGCTAGTTGGTGGGGTAAAGGCCTA
CCAAGGCTCAGATGGTTAGCGGGTGTGAGAGCATGGCCCGTCTCACTGGGACTGAGACACTGCCCAGACACCTACGGGTG
GCTGCAGTCGAGAATCTTCCGCAATGGGCGAAAGCCTGACGGAGCGACGCCGCGTGCGGGATGAAGGCCTTCGGGTTGTA
AACCGCTGTCAGTAGGGAGGAAATTTTGACCGATCTACAGAGGAAGCACAGGCTAAGTTCGTGCCAGCCGCCGCCGTAAC
AC
>OTU_256
ATTGAACGCTGGCGGCATGCCTAACACATGCAAGTCGAACGGAAACGATGGGAGCTTGCTCCCAGGCGTCGAGTGGCGGA
CGGGTGAGTAATACTTAGGAATCTACCCAGTAGCGGgggACAACTCGGGGAAACTCGAGCTAATACCGCATACGCTCTAC
GGAGGAAAGCAGGGGATCTTCGGACCTTGCACTATTGGATGAGCCTAAGTCGGATTAGCTTGTTGGTGAGGTAAAGGCTC
ACCAAGGCGACGATCCGTAGCTGGTCTGAGAGGACGATCAGCCACACTGGGACTGAGACACGGCCCAGACTCCTACGGGA
GGCAGCAGTGGGGAATATTGGACAATGGgggCAACCCTGATCCAGCAATGCCGCGTgtgtgAAGAAGGCCTGCGGGTTGT
AAAGCACTTTCAGTAGAGAAGAAAAGCCTAGGGTTAATACCCCTGAGTCTTGACGTTACCTACAGAAGAAGCTCCGGCTA
ACTCCGTGCCAGCCGCCGCCGTAACAC
>OTU_257
AGCGAACGCTGGCGGCAGGCCTAACACATGCAAGTCGAGCGAGAAAATTCCTTCGGGAATGATTAAAGCGGCGGACGGGT
GCGTACAACATGGATAACCTACCATAAGGACCGGGATAACCTCGGGAAACCGAAGCTAATACCGGATAAGACCACATTAT
CTGCGGATAAAGGGGTAAAATGTTtttCGCCTTTTGATGGGTCCATGCTCCATCAGGTTGTTGGTGAGGTAAAAGCTCAC
CAAGCCGAAGACGGATAGCCGGCCTTAGCGGGTGATCGGCCACACGGGGACTGAGACACGGCCCCGACTCCTACGGGAGG
CAGCAGTGGGGAATATTGGGCAATGGGCGAAAGCCTGACCCAGCCATGCCGCGTGAAGGATGAAGGCCTTCGGGTCGTAA
ACTTCTGTCAGTAGGGACGATGGGACTTCGGTCTTGACGGTACCTACAGAGGAAGCCCCGGCTAACTCCGTGCCAGCCGC
CGCCGTAACAC
>OTU_258
AATGAACGTTGGCGGCGTGGATTAGGCATGCAAGTCGAGCGAGAAACCAATTAGCTTGCTAAGAGGTGGACAGCGGCGAA
AGGGAGAGTAACGCGTGGTTACGTGCCCTCGGGACCGGGATAGTGTTGGGAAACTGGCAGTAATACCGGATAACATCTAT
GGATCAAATGGTGAGATTCCGCCCGAGGATCGGACCGCGTACTATTAGCTTGTTGGCGGGGTAACGGCCCACCAAGGCTG
CGATGGTTACCGGGTGTGAGAGCATGGCCCGGCTCACTGGGACTGAGACACTGCCCAGACATCTACGGATGGCTGCAGTC
GAGAATCTTCGGCAATGGACGAAAGTCTGACCGAGCGACGCCGCGTGCGGGATGAAGGCCCTCGGGTTGTAAACCGCTGT
CAGTTGGGAGGAAATTCATGGgggTTCTCCCCTGTGATTGACCGAGCTTCAGAGGAAGGACGGGCTAAGTTCGTGCCAGC
CGCCGCCGTAACAC
>OTU_259
GATGAACGCTAGCGGCAGGCCTAATACATGCAAGTCGAGGGGTATATGAGTGCTTGCACTCATAGAGACCGGCGAACGGG
TGCGTAACACGTATGCAACCTACCTTCAACAGAGGAATAGCCCGAAGAAATTCGGATTAATGCCTCATAACATTGCGACA
TGGCATCATGATGCAATTAAAGCTCCGGCGGTTGAAGATGGGCATGCGGTCCATTAGTTAGTTGGTGAGGTAACGGCTCA
CCAAGGCCACGATGGATAGGgggTCTGAGAGGATGATCCcccACACTGGTACTGAGACACGGACCAGACTCCTACGGGAG
GCAGCAGTAGGGAATATTGGACAATGGGCGAAAGCCTGATCCAGCCATGCCGCGTGCAGGATGACTGCCCTATGGGTTGT
AAACTGCTTTTATATGGAAAGAAACACTCCCACGTGTGGGAGCTTGACGGTACCATATGAATAAGGATCGGCTAACTCCG
TGCCAGCCGCCGCCGTAACAC
>OTU_260
ATTGAACGCTGGCGGCATGGCTAAAACATGCAAGTCGAACGCGAAAGCACTTCGGTGCAAGTAGAGTGGCGAAAGGGCGA
GGAATAAGTACCTAACGTGCCTTCAGGTAAGGGATAGCTCATGGAAACGTGTGGTAATACCTTATAATCTCCATCTTCCG
TATGGTTGGTGGAGCAAAGGCTTGCTGCCTGAAGATCGGGGTACTTCCTATCAGCTTGTTGGTAAGGTAACGGCTTACCA
AGGCTAAGACGGGTAGCGGGTGTGAGAGCATGACCCGCCGCATCGGGACTGAGACACTGCCCGGACTCCTACGGGAGGCT
GCAGTAACGAATATTCCGCAATGCGCGAAAGCGTGACGGAGCAATGCCGCGTGTGGGATGAAGCATCTAGGTgtgtAAAC
CACTGTCAGGGTTTAGGAAACAAATGACCAGACCCAAAGGAAGAGCCGGCTAACTCTGTGCCAGCCGCCGCCGTAACAC
[truncated: 43,155 more rows]
