# Supplementary material for: Does Dark-Spot Syndrome Experimentally Transmit among Caribbean Corals?
Source: PLOS journal article supplement (doi:10.1371/journal.pone.0147493), 2016-01-20

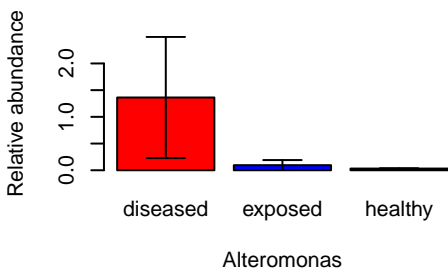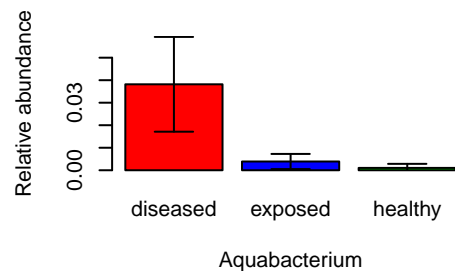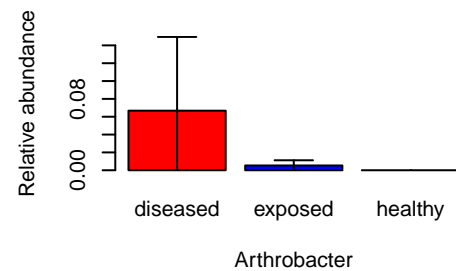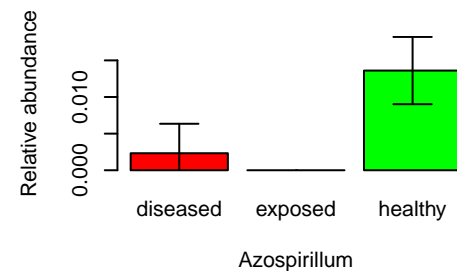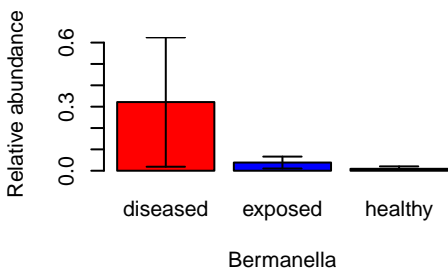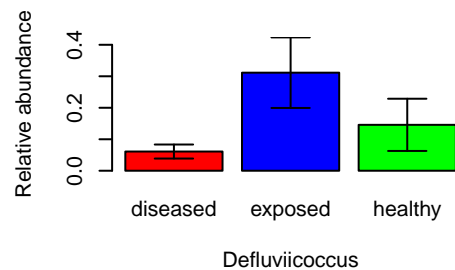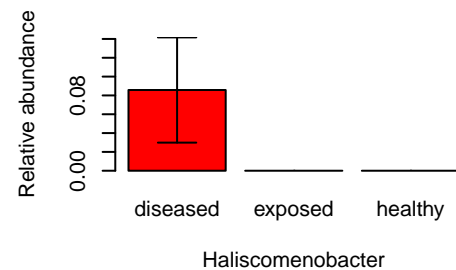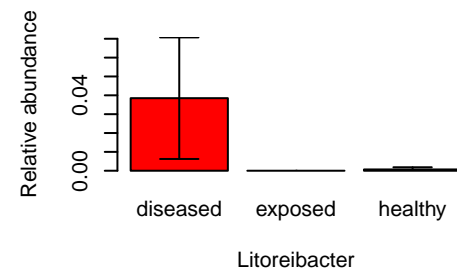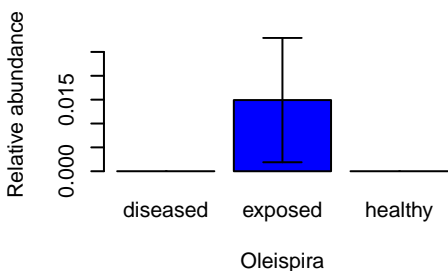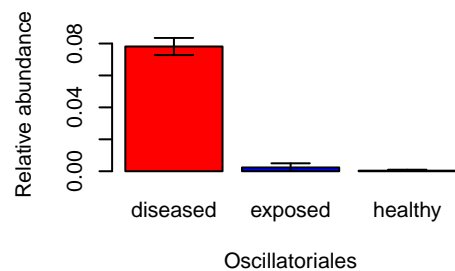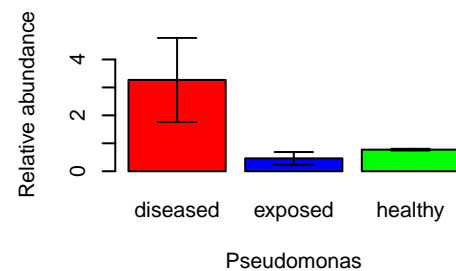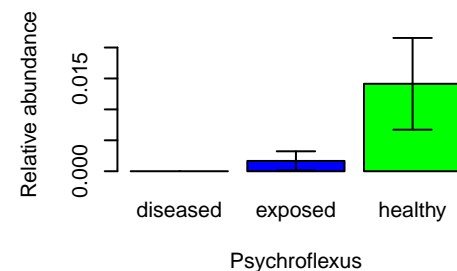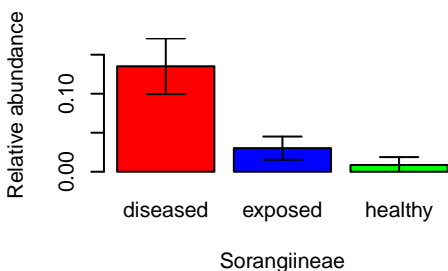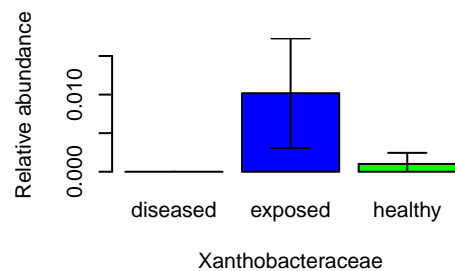

Supplement: S4 (10.1371/journal.pone.0147493.s004) [file journal.pone.0147493.s004]
